# Supplementary material
Source: PubMed Central journal article supplement (PMC6105271)
Supplement: NIHMS982596-supplement-Supporting_Information.pdf [file NIHMS982596-supplement-Supporting_Information.pdf]

# Achieving High Ortho Selectivity in Aniline C–H Borylations by Modifying Boron Substituents

Milton R. Smith, III,<sup>§,\*</sup> Ranjana Bisht,<sup>†,‡</sup> Chabush Haldar,<sup>†</sup> Gajanan Pandey,<sup>‡</sup> Jonathan E. Dannatt,<sup>§</sup> Behnaz Ghaffari,<sup>§</sup> Robert E. Maleczka, Jr.,<sup>§,\*</sup> and Buddhadeb Chattopadhyay,<sup>†,\*</sup>

<sup>§</sup>*Department of Chemistry, Michigan State University, 578 South Shaw Lane, East Lansing, Michigan 48824-1322 USA*

<sup>†</sup>*Division of Molecular Synthesis & Drug Discovery, Centre of Bio-Medical Research (CBMR), SGPGIMS Campus, Raebareli Road, Lucknow 226014, U.P., India*

<sup>‡</sup>*Department of Applied Chemistry, Babasaheb Bhimrao Ambedkar University, Lucknow 226025, U.P., India*

M.R.S: [smithmil@msu.edu](mailto:smithmil@msu.edu). R.E.M: [maleczka@chemistry.msu.edu](mailto:maleczka@chemistry.msu.edu). B.C: [buddhadeb.c@cbmr.res.in](mailto:buddhadeb.c@cbmr.res.in).

## Supporting Information

|                                                         |     |
|---------------------------------------------------------|-----|
| Experimental section.....                               | S3  |
| General information.....                                | S3  |
| Ortho-borylation of aniline derivatives .....           | S4  |
| Ortho-borylation of aniline (2a).....                   | S4  |
| Ortho-borylation of 2-fluoroaniline (2b) .....          | S5  |
| Ortho-borylation of 2-chloroaniline (2c).....           | S6  |
| Ortho-borylation of 2-bromoaniline (2d).....            | S7  |
| Ortho-borylation of 2-trifluoromethylaniline (2e) ..... | S8  |
| Ortho-borylation of 2-aminobenzonitrile (2f).....       | S9  |
| Ortho-borylation of 2-methylaniline (2g).....           | S10 |
| Ortho-borylation of 2-methoxyaniline (2h) .....         | S11 |
| Ortho-borylation of 2-phenylaniline (2i).....           | S12 |
| Ortho-borylation of 3-fluoroaniline (2j).....           | S13 |
| Ortho-borylation of 3-chloroaniline (2k).....           | S14 |
| Ortho-borylation of 3-trifluoromethylaniline (2l).....  | S15 |
| Ortho-borylation of 3-methoxyaniline (2m).....          | S16 |
| Ortho-borylation of 4-trifluoromethylaniline (2n) ..... | S17 |
| Ortho-borylation of 4-methoxyaniline (2o) .....         | S18 |
| Ortho-borylation of 4-aminobenzonitrile (2p).....       | S19 |
| Ortho-borylation of 4-fluoroaniline (2q) .....          | S20 |
| Ortho-borylation of 4-phenylaniline (2r).....           | S21 |
| Ortho-borylation of 4-nitroaniline (2s).....            | S22 |
| Ortho-borylation of 2-methyl-4-methoxyaniline (2t)..... | S23 |
| Ortho-borylation of 3,4-dimethoxyaniline (2u) .....     | S24 |

|                                                                                                 |     |
|-------------------------------------------------------------------------------------------------|-----|
| Ortho-borylation of 3,4-ethylenedioxy aniline (2v).....                                         | S25 |
| Ortho-borylation of 2,4-dimethoxyaniline (2w) .....                                             | S26 |
| Ortho-borylation at 7-position of 2-methylquinolin-6-amine (2x): .....                          | S27 |
| Borylation at 2-position of 1H-indole (2y):.....                                                | S28 |
| Large scale ortho-borylation of aniline: .....                                                  | S29 |
| Ortho-borylation of <i>N</i> -methylaniline same conditions as Table 1:.....                    | S30 |
| Ortho-borylation of <i>N</i> -methylaniline (eq 1): .....                                       | S31 |
| C–H borylation of aniline with B <sub>2</sub> pin <sub>2</sub> .....                            | S34 |
| Synthesis of 4,4,5,5-tetramethyl- <i>N</i> -phenyl-1,3,2-dioxaborolan-2-amine (PhN(H)Bpin)..... | S34 |
| Regioselectivity of C–H borylation of PhN(H)Bpin with B <sub>2</sub> eg <sub>2</sub> .....      | S35 |
| Aniline <i>N</i> -Beg formation.....                                                            | S35 |
| Regioselectivity of C–H borylation of PhN(H)Beg with B <sub>2</sub> pin <sub>2</sub> .....      | S36 |
| Computational procedures and results .....                                                      | S37 |
| General .....                                                                                   | S37 |
| Guide to structures, structure titles and their organization .....                              | S37 |
| Calculated Structures, Energies, and Selected NPA Charges.....                                  | S38 |
| Reactants: .....                                                                                | S38 |
| PhN(H)Beg.....                                                                                  | S38 |
| PhN(Me)Beg .....                                                                                | S38 |
| (4,4'-dimethyl-2,2'-bipyridine)Ir(Beg) <sub>3</sub> .....                                       | S39 |
| Transition structures: .....                                                                    | S39 |
| TS1.....                                                                                        | S39 |
| TS2.....                                                                                        | S40 |
| TS3.....                                                                                        | S41 |
| TS4.....                                                                                        | S42 |
| TS <sub>meta</sub> .....                                                                        | S43 |
| TS5.....                                                                                        | S44 |
| TS6.....                                                                                        | S45 |
| TS <sub>para</sub> .....                                                                        | S46 |
| TS7.....                                                                                        | S47 |
| TS8.....                                                                                        | S48 |
| NMR spectra.....                                                                                | S50 |
| References .....                                                                                | S87 |

## Experimental section

### General information

All commercially available chemicals were used as received unless otherwise indicated. Pinacolborane (HBPin) and bis(pinacolato)diboron ( $B_2Pin_2$ ) were procured from Sigma-Aldrich and A. K. Scientific respectively and used directly.  $B_2eg_2$  was produced as previously reported from  $B_2(OH)_4$  and ethylene glycol.<sup>1</sup> Bis( $\eta^4$ -1,5-cyclooctadiene)-di- $\mu$ -methoxy-diiridium(I)  $[Ir(OMe)COD]_2$  was procured from Sigma-Aldrich. Tetrahydrofuran (THF) were refluxed over sodium/benzophenone ketyl, distilled and degassed twice before borylation. Column chromatography was performed on flash silica gel (ACME, India). Thin layer chromatography was performed on 0.25 mm thick aluminum-backed silica gel plates purchased from Merck and visualized with ultraviolet light ( $\lambda = 254$  nm). All borylations were conducted in an argon-filled glovebox, unless otherwise stated.

$^1H$ ,  $^{13}C$ , and  $^{11}B$  NMR spectra collected at the Centre of Biomedical Research (CBMR, Lucknow) were recorded on Bruker 400 MHz, 600 MHz and 800 MHz NMR spectrometers.  $^1H$ ,  $^{13}C$ , and  $^{11}B$  NMR spectra collected at Michigan State University were recorded on Varian 500 MHz NMR spectrometers. The boron bearing carbon atom was not observed due to quadrupolar relaxation. All coupling constants are apparent  $J$  values measured at the indicated field strengths in Hertz (s = singlet, d = doublet, t = triplet, q = quartet, dd = doublet of doublets, bs = broad singlet, dt = doublet of triplet, td = triplet of doublet, ttt = triplet of triplet of triplet). High-resolution mass spectra (HRMS) were obtained at the Centre of Biomedical Research Mass Spectrometry Service Center using a Waters GCT Premier instrument run on electron ionization (EI) direct probe or a Waters QTOF Ultima instrument run on electrospray ionization (ESI+). GC-MS (Agilent Technology) was obtained from Centre of Biomedical Research.

## Ortho-borylation of aniline derivatives

### Ortho-borylation of aniline (2a)

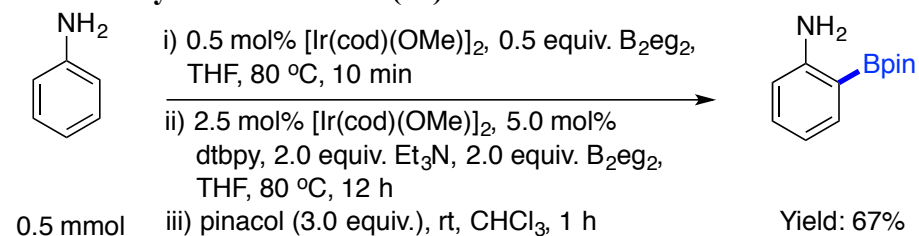

In a glove box, a 5.0 mL Wheaton microreactor was charged with  $[\text{Ir}(\text{cod})(\text{OMe})]_2$  (1.65 mg, 0.5 mol %),  $\text{B}_2\text{eg}_2$  (35.5 mg, 0.5 equiv.), aniline (46.6 mg, 0.5 mmol), dry THF (0.5 mL) and stirred in a preheated aluminum block at 80 °C for 10 min. The microreactor was charged again with  $[\text{Ir}(\text{cod})(\text{OMe})]_2$  (8.28 mg, 2.5 mol %), dtbpy (6.7 mg, 5.0 mol %),  $\text{B}_2\text{eg}_2$  (142.0 mg, 2.0 equiv.),  $\text{Et}_3\text{N}$  (139.0  $\mu\text{L}$ , 2.0 equiv.) and dry THF (1.0 mL). The microreactor was capped with a teflon pressure cap and placed into a preheated aluminum block at 80 °C. After 12 h, THF was removed under reduced pressure using dry  $\text{CHCl}_3$  as transferring solvent and transesterification was performed using dry  $\text{CHCl}_3$  (4.0 mL) and pinacol (177.0 mg, 3.0 equiv.) at room temperature for 1 h. Removal of solvent under reduced pressure and chromatographic separation with silica gel (1% EtOAc in hexane as eluent) gave 73.4 mg of ortho-borylated aniline (67%) as a liquid. Spectral data are in accordance with the reported data.<sup>2</sup>

### Ortho-borylation of 2-fluoroaniline (2b)

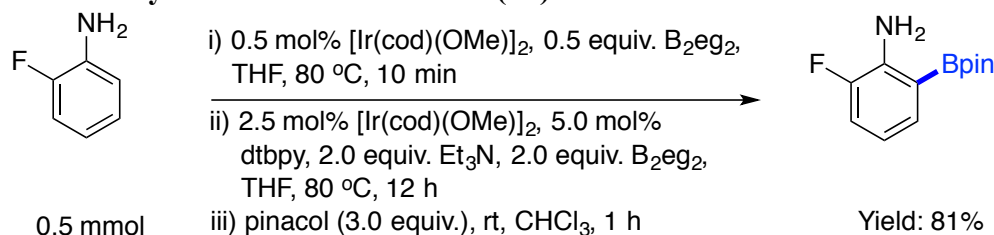

In a glove box, a 5.0 mL Wheaton microreactor was charged with  $[\text{Ir}(\text{cod})(\text{OMe})]_2$  (1.65 mg, 0.5 mol %),  $\text{B}_2\text{eg}_2$  (35.5 mg, 0.5 equiv.), 2-fluoroaniline (55.6 mg, 0.5 mmol) dry THF (0.5 mL) and stirred in a preheated aluminum block at 80 °C for 10 min. The microreactor was charged again with  $[\text{Ir}(\text{cod})(\text{OMe})]_2$  (8.28 mg, 2.5 mol %), dtbpy (6.7 mg, 5.0 mol %),  $\text{B}_2\text{eg}_2$  (142.0 mg, 2.0 equiv.),  $\text{Et}_3\text{N}$  (139.0  $\mu\text{L}$ , 2.0 equiv.) and dry THF (1.0 mL). The microreactor was capped with a teflon pressure cap and placed into a preheated aluminum block at 80 °C. After 12 h, THF was removed under reduced pressure using dry  $\text{CHCl}_3$  as transferring solvent and transesterification was performed using dry  $\text{CHCl}_3$  (4.0 mL) and pinacol (177.0 mg, 3.0 equiv.) at room temperature for 1 h. Removal of solvent under reduced pressure and chromatographic separation with silica gel (1% EtOAc in hexane as eluent) gave 96.0 mg of ortho-borylated 2-fluoroaniline (81%) as a solid (mp = 50-51 °C).

$^1\text{H}$  NMR (400 MHz,  $\text{CDCl}_3$ ):  $\delta$  7.37 (d,  $J$  = 7.2 Hz, 1H), 7.03 (ddd,  $J$  = 11.6,  $J$  = 8.0,  $J$  = 1.2 Hz, 1H), 6.59 (dt,  $J$  = 7.6,  $J$  = 4.0 Hz, 1H), 4.82 (br, 2H), 1.35 (s, 12H).

$^{13}\text{C}$  NMR (100 MHz,  $\text{CDCl}_3$ ):  $\delta$  151.2 (d,  $J$  = 237.7 Hz), 141.7 (d,  $J$  = 11.1 Hz), 131.6 (d,  $J$  = 3.6 Hz), 117.7 (d,  $J$  = 18.1 Hz), 116.4 (d,  $J$  = 6.2 Hz), 83.7, 24.9.

$^{11}\text{B}$  NMR (128 MHz,  $\text{CDCl}_3$ ):  $\delta$  30.9.

HRMS (ESI)  $m/z$  calcd for  $\text{C}_{12}\text{H}_{18}\text{BFNO}_2$   $[\text{M}+\text{H}]^+$  238.1415, found: 238.1404.

### Ortho-borylation of 2-chloroaniline (2c)

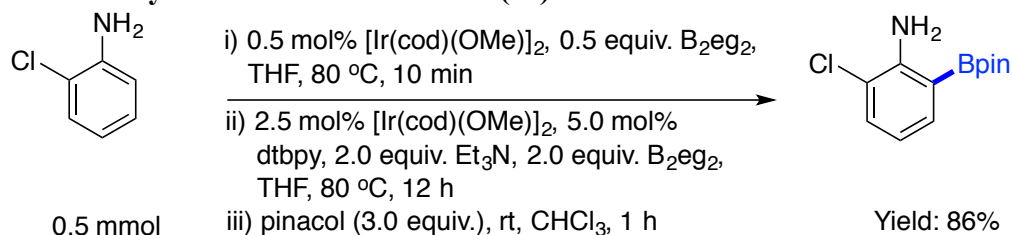

In a glove box, a 5.0 mL Wheaton microreactor was charged with  $[\text{Ir}(\text{cod})(\text{OMe})]_2$  (1.65 mg, 0.5 mol %),  $\text{B}_2\text{eg}_2$  (35.5 mg, 0.5 equiv.), 2-chloroaniline (63.8 mg, 0.5 mmol), dry THF (0.5 mL) and stirred in a preheated aluminum block at 80 °C for 10 min. The microreactor was charged again with  $[\text{Ir}(\text{cod})(\text{OMe})]_2$  (8.28 mg, 2.5 mol %), dtbpy (6.7 mg, 5.0 mol %),  $\text{B}_2\text{eg}_2$  (142.0 mg, 2.0 equiv.),  $\text{Et}_3\text{N}$  (139.0  $\mu\text{L}$ , 2.0 equiv.) and dry THF (1.0 mL). The microreactor was capped with a teflon pressure cap and placed into a preheated aluminum block at 80 °C and stirred. After 12 h, THF was removed under reduced pressure using dry  $\text{CHCl}_3$  as transferring solvent and transesterification was performed using dry  $\text{CHCl}_3$  (4.0 mL) and pinacol (177.0 mg, 3.0 equiv.) at room temperature for 1 h. Removal of solvent under reduced pressure and chromatographic separation with silica gel (1% EtOAc in hexane as eluent) gave 109.0 mg of ortho-borylated 2-chloroaniline (86%) as a white solid (mp = 84-85 °C).

$^1\text{H}$  NMR (400 MHz,  $\text{CDCl}_3$ ):  $\delta$  7.53 (dd,  $J$  = 7.6 Hz,  $J$  = 1.6 Hz, 1H), 7.31 (dd,  $J$  = 8.0 Hz,  $J$  = 1.6 Hz, 1H), 6.60 (t,  $J$  = 7.6 Hz, 1H), 5.22 (bs, 2H), 1.35 (s, 12H).

$^{13}\text{C}$  NMR (100 MHz,  $\text{CDCl}_3$ ):  $\delta$  149.3, 135.3, 132.5, 118.9, 117.1, 83.9, 24.9.

$^{11}\text{B}$  NMR (128 MHz,  $\text{CDCl}_3$ ):  $\delta$  31.2.

HRMS (ESI)  $m/z$  calcd for  $\text{C}_{12}\text{H}_{18}\text{BClNO}_2$   $[\text{M}+\text{H}]^+$  254.1119, found: 254.1109.

### Ortho-borylation of 2-bromoaniline (2d)

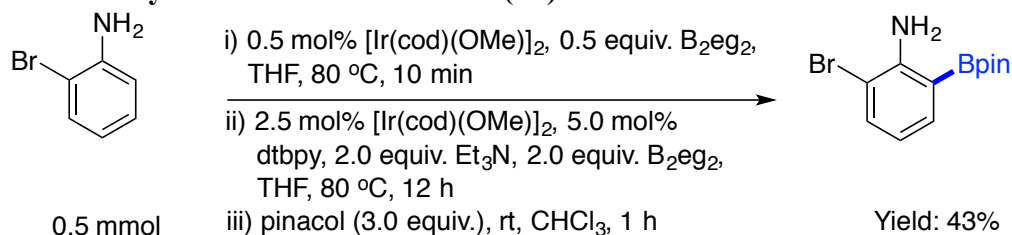

In a glove box, a 5.0 mL Wheaton microreactor was charged with  $[\text{Ir}(\text{cod})(\text{OMe})]_2$  (1.65 mg, 0.5 mol %),  $\text{B}_2\text{eg}_2$  (35.5 mg, 0.5 equiv.), 2-bromoaniline (86.0 mg, 0.5 mmol), dry THF (0.5 ml) and stirred in a preheated aluminum block at 80 °C for 10 min. The microreactor was charged again with  $[\text{Ir}(\text{cod})(\text{OMe})]_2$  (8.28 mg, 2.5 mol %), dtbpy (6.7 mg, 5.0 mol %),  $\text{B}_2\text{eg}_2$  (142.0 mg, 2.0 equiv.),  $\text{Et}_3\text{N}$  (139.0  $\mu\text{L}$ , 2.0 equiv.) and dry THF (1.0 mL). The microreactor was capped with a teflon pressure cap and placed into a preheated aluminum block at 80 °C. After 12 h, THF was removed under reduced pressure using dry  $\text{CHCl}_3$  as transferring solvent and transesterification was performed using dry  $\text{CHCl}_3$  (4.0 mL) and pinacol (177.0 mg, 3.0 equiv.) at room temperature for 1 h. Removal of solvent under reduced pressure and chromatographic separation with silica gel (5% EtOAc in hexane as eluent) gave 64.0 mg of ortho-borylated 2-bromoaniline (43%) as a light yellow solid (mp = 82-83 °C).

$^1\text{H}$  NMR (400 MHz,  $\text{CDCl}_3$ ):  $\delta$  7.56 (d,  $J$  = 7.2 Hz, 1H), 7.48 (dd,  $J$  = 7.6 Hz,  $J$  = 0.8 Hz, 1H), 6.54 (t,  $J$  = 7.6 Hz, 1H), 5.28 (bs, 2H), 1.34 (s, 12H).

$^{13}\text{C}$  NMR (100 MHz,  $\text{CDCl}_3$ ):  $\delta$  150.3, 136.0, 135.9, 117.6, 109.5, 83.9, 24.9.

$^{11}\text{B}$  NMR (128 MHz,  $\text{CDCl}_3$ ):  $\delta$  30.5.

HRMS (ESI)  $m/z$  calcd for  $\text{C}_{12}\text{H}_{18}\text{BBrNO}_2$   $[\text{M}+\text{H}]^+$  298.0614, found: 298.0607.

### Ortho-borylation of 2-trifluoromethylaniline (2e)

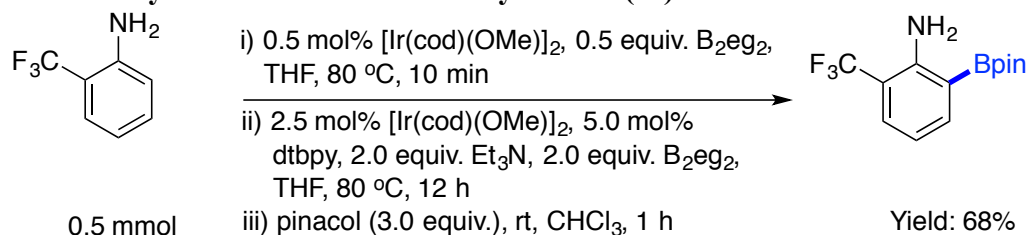

In a glove box, a 5.0 mL Wheaton microreactor was charged with  $[\text{Ir}(\text{cod})(\text{OMe})]_2$  (1.65 mg, 0.5 mol %),  $\text{B}_2\text{eg}_2$  (35.5 mg, 0.5 equiv.), 2-trifluoromethylaniline (80.6 mg, 0.5 mmol), dry THF (0.5 mL) and stirred in a preheated aluminum block at 80 °C for 10 min. The microreactor was charged again with  $[\text{Ir}(\text{cod})(\text{OMe})]_2$  (8.28 mg, 2.5 mol %), dtbpy (6.7 mg, 5.0 mol %),  $\text{B}_2\text{eg}_2$  (142.0 mg, 2.0 equiv.),  $\text{Et}_3\text{N}$  (139.0  $\mu\text{L}$ , 2.0 equiv.) and dry THF (1.0 mL). The microreactor was capped with a teflon pressure cap and placed into a preheated aluminum block at 80 °C. After 12 h, THF was removed under reduced pressure using dry  $\text{CHCl}_3$  as transferring solvent and transesterification was performed using dry  $\text{CHCl}_3$  (4.0 mL) and pinacol (177.0 mg, 3.0 equiv.) at room temperature for 1 h. Removal of solvent under reduced pressure and chromatographic separation with silica gel (1% EtOAc in hexane as eluent) gave 97.6 mg of ortho-borylated 2-trifluoromethylaniline (68%) as a white solid (mp = 89-90 °C).

$^1\text{H}$  NMR (400 MHz,  $\text{CDCl}_3$ ):  $\delta$  7.77 (d,  $J$  = 7.2 Hz, 1H), 7.50 (d,  $J$  = 7.6 Hz, 1H), 6.69 (t,  $J$  = 7.6 Hz, 1H), 5.38 (bs, 2H), 1.35 (s, 12H).

$^{13}\text{C}$  NMR (100 MHz,  $\text{CDCl}_3$ ):  $\delta$  151.1 (d,  $J$  = 1.5 Hz), 140.9, 130.1 (q,  $J$  = 5.3 Hz), 125.2 (d,  $J$  = 270.7 Hz), 115.7, 112.9 (q,  $J$  = 29.1 Hz), 84.0, 24.9.

$^{11}\text{B}$  NMR (128 MHz,  $\text{CDCl}_3$ ):  $\delta$  30.6

HRMS (ESI)  $m/z$  calcd for  $\text{C}_{13}\text{H}_{18}\text{BF}_3\text{NO}_2$   $[\text{M}+\text{H}]^+$  288.1383, found: 288.1376.

### Ortho-borylation of 2-aminobenzonitrile (2f)

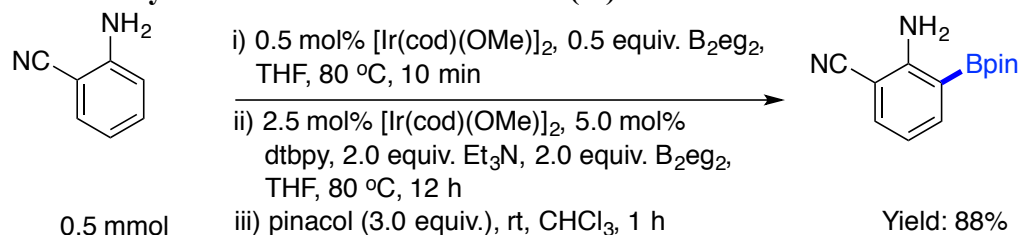

In a glove box, a 5.0 mL Wheaton microreactor was charged with  $[\text{Ir}(\text{cod})(\text{OMe})]_2$  (1.65 mg, 0.5 mol %),  $\text{B}_2\text{eg}_2$  (35.5 mg, 0.5 equiv.), 2-aminobenzonitrile (59.1 mg, 0.5 mmol), dry THF (0.5 mL) and stirred in a preheated aluminum block at 80 °C for 10 min. The microreactor was charged again with  $[\text{Ir}(\text{cod})(\text{OMe})]_2$  (8.28 mg, 2.5 mol %), dtbpy (6.7 mg, 5.0 mol %),  $\text{B}_2\text{eg}_2$  (142.0 mg, 2.0 equiv.),  $\text{Et}_3\text{N}$  (139.0  $\mu\text{L}$ , 2.0 equiv.) and dry THF (1.0 mL). The microreactor was capped with a Teflon pressure cap and placed into a preheated aluminum block at 80 °C. After 12 h, THF was removed under reduced pressure using dry  $\text{CHCl}_3$  as transferring solvent and transesterification was performed using dry  $\text{CHCl}_3$  (4.0 mL) and pinacol (177.0 mg, 3.0 equiv.) at room temperature for 1 h. Removal of solvent under reduced pressure and chromatographic separation with silica gel (1% EtOAc in hexane as eluent) gave 107.4 mg of ortho-borylated 2-aminobenzonitrile (88%) as a light yellow solid (mp = 95-96 °C).

$^1\text{H}$  NMR (400 MHz,  $\text{CDCl}_3$ ):  $\delta$  7.78 (dd,  $J$  = 7.2 Hz,  $J$  = 1.6 Hz, 1H), 7.45 (dd,  $J$  = 7.6 Hz,  $J$  = 1.6 Hz, 1H), 6.65 (t,  $J$  = 7.6 Hz, 1H), 5.55 (bs, 2H), 1.35 (s, 12H).

$^{13}\text{C}$  NMR (200 MHz,  $\text{CDCl}_3$ ):  $\delta$  155.5, 141.9, 135.9, 117.9, 116.3, 95.4, 84.2, 24.9.

$^{11}\text{B}$  NMR (128 MHz,  $\text{CDCl}_3$ ):  $\delta$  30.9.

HRMS (ESI)  $m/z$  calcd for  $\text{NaC}_{13}\text{H}_{17}\text{BN}_2\text{O}_2$   $[\text{M}+\text{Na}]^+$  267.1281, found: 267.1275.

### Ortho-borylation of 2-methylaniline (2g)

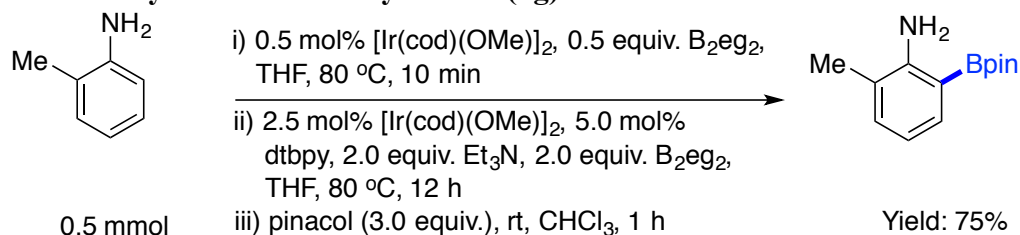

In a glove box, a 5.0 mL Wheaton microreactor was charged with  $[\text{Ir}(\text{cod})(\text{OMe})]_2$  (1.65 mg, 0.5 mol %),  $\text{B}_2\text{eg}_2$  (35.5 mg, 0.5 equiv.), 2-methylaniline (53.6 mg, 0.5 mmol), dry THF (0.5 ml) and stirred in a preheated aluminum block at 80 °C for 10 min. The microreactor was charged again with  $[\text{Ir}(\text{cod})(\text{OMe})]_2$  (8.28 mg, 2.5 mol %), dtbpy (6.7 mg, 5.0 mol %),  $\text{B}_2\text{eg}_2$  (142.0 mg, 2.0 equiv.),  $\text{Et}_3\text{N}$  (139.0  $\mu\text{L}$ , 2.0 equiv.) and dry THF (1.0 mL). The microreactor was capped with a teflon pressure cap and placed into a preheated aluminum block at 80 °C. After 12 h, THF was removed under reduced pressure using dry  $\text{CHCl}_3$  as transferring solvent and transesterification was performed using dry  $\text{CHCl}_3$  (4.0 mL) and pinacol (177.0 mg, 3.0 equiv.) at room temperature for 1 h. Removal of solvent under reduced pressure and chromatographic separation with silica gel (1% EtOAc in hexane as eluent) gave 87.4 mg of ortho-borylated 2-methylaniline (75%) as a white solid (mp = 44-45 °C).

$^1\text{H}$  NMR (400 MHz,  $\text{CDCl}_3$ ):  $\delta$  7.53 (d,  $J$  = 7.2 Hz, 1H), 7.13 (d,  $J$  = 6.8 Hz, 1H), 6.65 (t,  $J$  = 7.2 Hz, 1H), 4.77 (bs, 2H), 2.14 (s, 3H), 1.35 (s, 12H).

$^{13}\text{C}$  NMR (100 MHz,  $\text{CDCl}_3$ ):  $\delta$  151.8, 134.7, 133.7, 121.4, 116.8, 83.5, 24.9, 17.5.

$^{11}\text{B}$  NMR (128 MHz,  $\text{CDCl}_3$ ):  $\delta$  31.2.

HRMS (ESI)  $m/z$  calcd for  $\text{C}_{13}\text{H}_{21}\text{BNO}_2$   $[\text{M}+\text{H}]^+$  234.1665, found: 234.1662.

## Ortho-borylation of 2-methoxyaniline (2h)

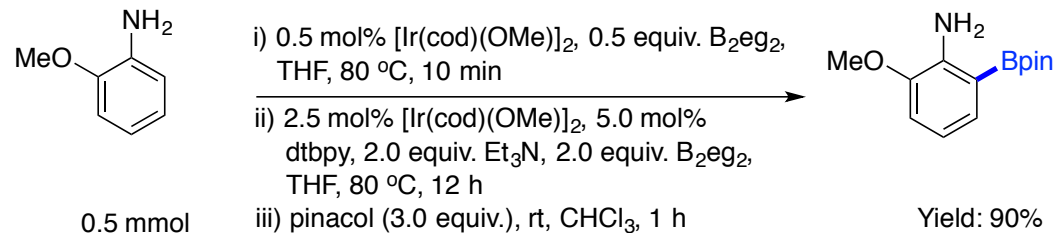

In a glove box, a 5.0 mL Wheaton microreactor was charged with  $[\text{Ir}(\text{cod})(\text{OMe})]_2$  (1.65 mg, 0.5 mol %),  $\text{B}_2\text{eg}_2$  (35.5 mg, 0.5 equiv.), 2-methoxyaniline (61.6 mg, 0.5 mmol), dry THF (0.5 mL) and stirred in a preheated aluminum block at 80 °C for 10 min. The microreactor was charged again with  $[\text{Ir}(\text{cod})(\text{OMe})]_2$  (8.28 mg, 2.5 mol %), dtbpy (6.7 mg, 5.0 mol %),  $\text{B}_2\text{eg}_2$  (142.0 mg, 2.0 equiv.),  $\text{Et}_3\text{N}$  (139.0  $\mu\text{L}$ , 2.0 equiv.) and dry THF (1.0 mL). The microreactor was capped with a teflon pressure cap and placed into a preheated aluminum block at 80 °C. After 12 h, THF was removed under reduced pressure using dry  $\text{CHCl}_3$  as transferring solvent and transesterification was performed using dry  $\text{CHCl}_3$  (4.0 mL) and pinacol (177.0 mg, 3.0 equiv.) at room temperature for 1 h. Removal of solvent under reduced pressure and chromatographic separation with silica gel (1% EtOAc in hexane as eluent) gave 112.0 mg of ortho-borylated 2-methoxyaniline (90%) as a white solid (mp = 102-103 °C).

$^1\text{H}$  NMR (400 MHz,  $\text{CDCl}_3$ ):  $\delta$  7.22 (d,  $J$  = 7.6 Hz, 1H), 6.84 (d,  $J$  = 8.0 Hz, 1H), 6.64 (t,  $J$  = 7.6 Hz, 1H), 4.97 (bs, 2H), 3.84 (s, 3H), 1.34 (s, 12H).

$^{13}\text{C}$  NMR (100 MHz,  $\text{CDCl}_3$ ):  $\delta$  146.4, 143.9, 128.0, 116.2, 112.8, 83.5, 55.5, 24.9.

$^{11}\text{B}$  NMR (128 MHz,  $\text{CDCl}_3$ ):  $\delta$  31.0.

HRMS (ESI)  $m/z$  calcd for  $\text{C}_{13}\text{H}_{21}\text{BNO}_3$   $[\text{M}+\text{H}]^+$  250.1614, found: 250.1612.

### Ortho-borylation of 2-phenylaniline (2i)

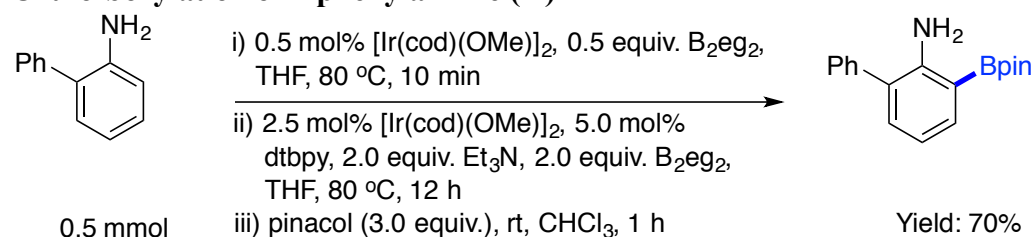

In a glove box, a 5.0 mL Wheaton microreactor was charged with  $[\text{Ir}(\text{cod})(\text{OMe})]_2$  (1.65 mg, 0.5 mol %),  $\text{B}_2\text{eg}_2$  (35.5 mg, 0.5 equiv.), 2-phenylaniline (84.6 mg, 0.5 mmol) and dry THF (0.5 mL) and stirred in a preheated aluminum block at 80 °C for 10 min. The microreactor was charged again with  $[\text{Ir}(\text{cod})(\text{OMe})]_2$  (8.28 mg, 2.5 mol %), dtbpy (6.7 mg, 5.0 mol %),  $\text{B}_2\text{eg}_2$  (142.0 mg, 2.0 equiv.),  $\text{Et}_3\text{N}$  (139.0  $\mu\text{L}$ , 2.0 equiv.) and dry THF (1.0 mL). The microreactor was capped with a teflon pressure cap and placed into a preheated aluminum block at 80 °C. After 12 h, THF was removed under reduced pressure using dry  $\text{CHCl}_3$  as transferring solvent and transesterification was performed using dry  $\text{CHCl}_3$  (4.0 mL) and pinacol (177.0 mg, 3.0 equiv.) at room temperature for 1 h. Removal of solvent under reduced pressure and chromatographic separation with silica gel (5% EtOAc in hexane as eluent) gave 103.0 mg of ortho-borylated 2-phenylaniline (70%) as a white solid (mp = 39-40 °C).

$^1\text{H}$  NMR (400 MHz,  $\text{CDCl}_3$ ):  $\delta$  7.64 (dd,  $J = 7.6$  Hz,  $J = 1.6$  Hz, 1H), 7.44 (s, 2H), 7.43 (d,  $J = 1.2$ , 2H), 7.34-7.36 (m, 1H), 7.17 (dd,  $J = 7.6$  Hz,  $J = 1.6$  Hz, 1H), 6.75 (t,  $J = 7.6$  Hz, 1H), 4.92 (bs, 2H), 1.35 (s, 12H).

$^{13}\text{C}$  NMR (100 MHz,  $\text{CDCl}_3$ ):  $\delta$  150.5, 139.8, 136.4, 133.8, 129.3, 128.8, 127.1, 127.0, 116.8, 83.6, 24.9.

$^{11}\text{B}$  NMR (128 MHz,  $\text{CDCl}_3$ ):  $\delta$  31.7.

HRMS (ESI)  $m/z$  calcd for  $\text{C}_{18}\text{H}_{23}\text{BNO}_2$   $[\text{M}+\text{H}]^+$  296.1822, found: 296.1816.

### Ortho-borylation of 3-fluoroaniline (2j)

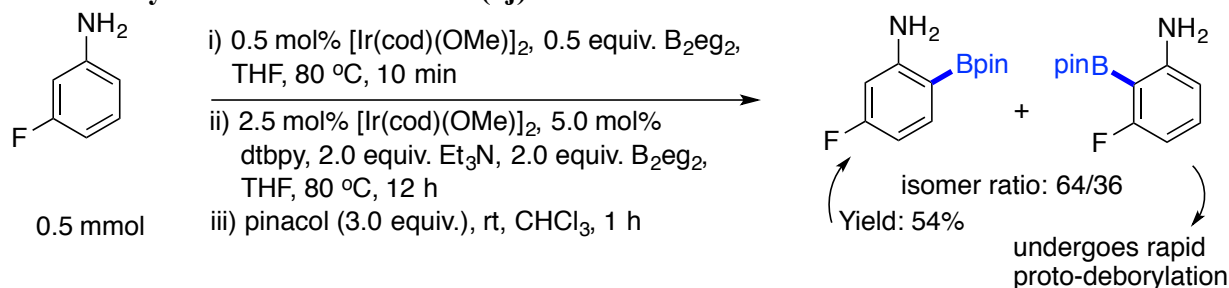

In a glove box, a 5.0 mL Wheaton microreactor was charged with [Ir(cod)(OMe)]<sub>2</sub> (1.65 mg, 0.5 mol %), B<sub>2</sub>eg<sub>2</sub> (35.5 mg, 0.5 equiv.), 3- fluoroaniline (55.6 mg, 0.5 mmol), dry THF (0.5 mL) and stirred in a preheated aluminum block at 80 °C for 10 min. The microreactor was charged again with [Ir(cod)(OMe)]<sub>2</sub> (8.28 mg, 2.5 mol %), dtbpy (6.7 mg, 5.0 mol %), B<sub>2</sub>eg<sub>2</sub> (142.0 mg, 2.0 equiv.), Et<sub>3</sub>N (139.0 μL, 2.0 equiv.) and dry THF (1.0 mL). The microreactor was capped with a teflon pressure cap and placed into a preheated aluminum block at 80 °C. After 12 h, THF was removed under reduced pressure using dry CHCl<sub>3</sub> as transferring solvent and transesterification was performed using dry CHCl<sub>3</sub> (4.0 mL) and pinacol (177.0 mg, 3.0 equiv.) at room temperature for 1 h. Analyzing the crude reaction mixture it was observed that two ortho isomers were formed and the ratio is shown in the above scheme. Moreover, 4% diborylation was observed, but due to less amount of the product, it was not characterized. Removal of solvent under reduced pressure and chromatographic separation with silica gel (1% EtOAc in hexane as eluent) gave 64.0 mg of ortho-borylated 3-fluoroaniline (major isomer 54%) as a brown solid (mp = 44-46 °C). Minor (mp = 82-84 °C).

**Data of Major Isomer:** <sup>1</sup>H NMR (400 MHz, CDCl<sub>3</sub>): δ 7.57 (t, J = 7.6 Hz, 1H), 6.36 (td, J = 8.4, J = 2.0 Hz, 1H), 6.26 (dd, J = 11.6, J = 2.4 Hz, 1H), 4.87 (br, 2H), 1.33 (s, 12H).

<sup>13</sup>C NMR (100 MHz, CDCl<sub>3</sub>): δ 166.4 (d, J = 246.5 Hz), 155.7 (d, J = 11.4 Hz), 138.9 (d, J = 10.5 Hz), 104.2 (d, J = 20.7 Hz), 100.9 (d, J = 23.3 Hz), 83.6, 24.9.

<sup>11</sup>B NMR (128 MHz, CDCl<sub>3</sub>): δ 30.2.

HRMS (ESI) *m/z* calcd for C<sub>12</sub>H<sub>18</sub>BFNO<sub>2</sub> [M+H]<sup>+</sup> 238.1415, found: 238.1406.

**Data of Minor Isomer:** <sup>1</sup>H NMR (600 MHz, CDCl<sub>3</sub>): δ 7.09-7.13 (m, 1H), 6.35 (dd, J = 8.4 Hz, J = 1.2 Hz, 1H), 6.31 (ddd, J = 9.6 Hz, J = 7.8 Hz, J = 0.6 Hz, 1H), 4.95 (bs, 2H), 1.36 (s, 12H).

<sup>13</sup>C NMR (150 MHz, CDCl<sub>3</sub>): δ 169.1 (d, J = 247.2 Hz), 155.4 (d, J = 10.9 Hz), 133.5 (d, J = 11.7 Hz), 110.5 (d, J = 2.4 Hz), 103.5 (d, J = 25.1 Hz), 83.4, 24.8.

$^{11}\text{B}$  NMR (192 MHz,  $\text{CDCl}_3$ ):  $\delta$  30.4.

HRMS (ESI)  $m/z$  calcd for  $\text{C}_{12}\text{H}_{18}\text{BFNO}_2$   $[\text{M}+\text{H}]^+$  238.1415, found: 238.1408.

#### Ortho-borylation of 3-chloroaniline (2k)

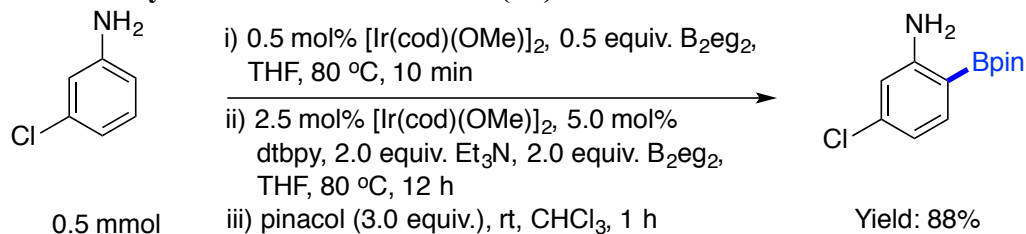

In a glove box, a 5.0 mL Wheaton microreactor was charged with  $[\text{Ir}(\text{cod})(\text{OMe})]_2$  (1.65 mg, 0.5 mol %),  $\text{B}_2\text{eg}_2$  (35.5 mg, 0.5 equiv.), 3-chloroaniline (63.8 mg, 0.5 mmol), dry THF (0.5 mL) and stirred in a preheated aluminum block at 80 °C for 10 min. The microreactor was charged again with  $[\text{Ir}(\text{cod})(\text{OMe})]_2$  (8.28 mg, 2.5 mol %), dtbpy (6.7 mg, 5.0 mol %),  $\text{B}_2\text{eg}_2$  (142.0 mg, 2.0 equiv.),  $\text{Et}_3\text{N}$  (139.0  $\mu\text{L}$ , 2.0 equiv.) and dry THF (1.0 mL). The microreactor was capped with a teflon pressure cap and placed into a preheated aluminum block at 80 °C. After 12 h, THF was removed under reduced pressure using dry  $\text{CHCl}_3$  as transferring solvent and transesterification was performed using dry  $\text{CHCl}_3$  (4.0 mL) and pinacol (177.0 mg, 3.0 equiv.) at room temperature for 1 h. Removal of solvent under reduced pressure and chromatographic separation with silica gel (1% EtOAc in hexane as eluent) gave 111.3 mg of ortho-borylated 3-chloroaniline (88%) as a white solid (mp = 64-65 °C).

$^1\text{H}$  NMR (400 MHz,  $\text{CDCl}_3$ ):  $\delta$  7.51 (d,  $J$  = 8.0 Hz, 1H), 6.63 (dd,  $J$  = 8.0 Hz,  $J$  = 2.0 Hz, 1H), 6.58 (d,  $J$  = 1.6 Hz, 1H), 4.81 (bs, 2H), 1.33 (s, 12H).

$^{13}\text{C}$  NMR (100 MHz,  $\text{CDCl}_3$ ):  $\delta$  154.6, 138.6, 138.0, 117.1, 114.2, 83.7, 24.9.

$^{11}\text{B}$  NMR (128 MHz,  $\text{CDCl}_3$ ):  $\delta$  30.6.

HRMS (ESI)  $m/z$  calcd for  $\text{C}_{12}\text{H}_{18}\text{BCINO}_2$   $[\text{M}+\text{H}]^+$  254.1119, found: 254.1114.

### Ortho-borylation of 3-trifluoromethylaniline (2l)

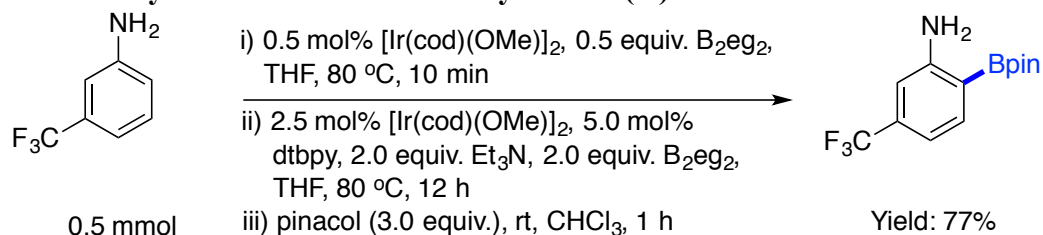

In a glove box, a 5.0 mL Wheaton microreactor was charged with  $[\text{Ir}(\text{cod})(\text{OMe})]_2$  (1.65 mg, 0.5 mol %),  $\text{B}_2\text{eg}_2$  (35.5 mg, 0.5 equiv.), 3-trifluoromethylaniline (80.6 mg, 0.5 mmol), dry THF (0.5 mL), and stirred in a preheated aluminum block at 80 °C for 10 min. The microreactor was charged again with  $[\text{Ir}(\text{cod})(\text{OMe})]_2$  (8.28 mg, 2.5 mol %), dtbpy (6.7 mg, 5.0 mol %),  $\text{B}_2\text{eg}_2$  (142.0 mg, 2.0 equiv.),  $\text{Et}_3\text{N}$  (139.0  $\mu\text{L}$ , 2.0 equiv.) and dry THF (1.0 mL). The microreactor was capped with a teflon pressure cap and placed into a preheated aluminum block at 80 °C. After 12 h, THF was removed under reduced pressure using dry  $\text{CHCl}_3$  as transferring solvent and transesterification was performed using dry  $\text{CHCl}_3$  (4.0 mL) and pinacol (177.0 mg, 3.0 equiv.) at room temperature for 1 h. Removal of solvent under reduced pressure and chromatographic separation with silica gel (1% EtOAc in hexane as eluent) gave 110.5 mg of ortho-borylated 3-trifluoromethylaniline (77%) as a solid (mp = 64-65 °C). Spectral data are in accordance with the reported data.<sup>3</sup>

### Ortho-borylation of 3-methoxyaniline (2m)

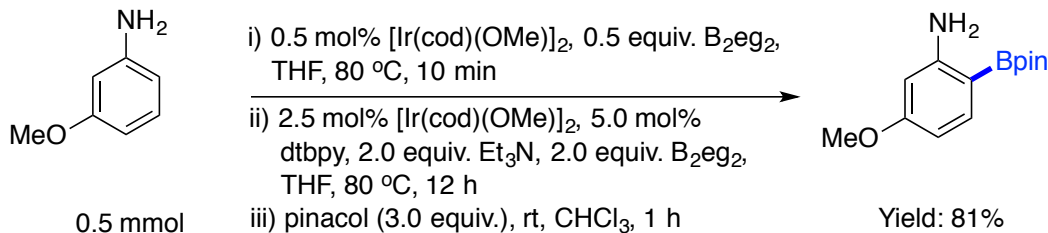

In a glove box, a 5.0 mL Wheaton microreactor was charged with  $[\text{Ir}(\text{cod})(\text{OMe})]_2$  (1.65 mg, 0.5 mol %),  $\text{B}_2\text{eg}_2$  (35.5 mg, 0.5 equiv.), 3-methoxyaniline (61.6 mg, 0.5 mmol), dry THF (0.5 mL) and stirred in a preheated aluminum block at 80 °C for 10 min. The microreactor was charged again with  $[\text{Ir}(\text{cod})(\text{OMe})]_2$  (8.28 mg, 2.5 mol %), dtbpy (6.7 mg, 5.0 mol %),  $\text{B}_2\text{eg}_2$  (142.0 mg, 2.0 equiv.),  $\text{Et}_3\text{N}$  (139.0  $\mu\text{L}$ , 2.0 equiv.) and dry THF (1.0 mL). The microreactor was capped with a teflon pressure cap and placed into a preheated aluminum block at 80 °C. After 12 h, THF was removed under reduced pressure using dry  $\text{CHCl}_3$  as transferring solvent and transesterification was performed using dry  $\text{CHCl}_3$  (4.0 mL) and pinacol (177.0 mg, 3.0 equiv.) at room temperature for 1 h. Removal of solvent under reduced pressure and chromatographic separation with silica gel (1% EtOAc in hexane as eluent) gave 101.0 mg of ortho-borylated 3-methoxyaniline (81%) as a white solid (mp = 32-33 °C). Spectral data are in accordance with the reported data.<sup>3</sup>

### Ortho-borylation of 4-trifluoromethylaniline (2n)

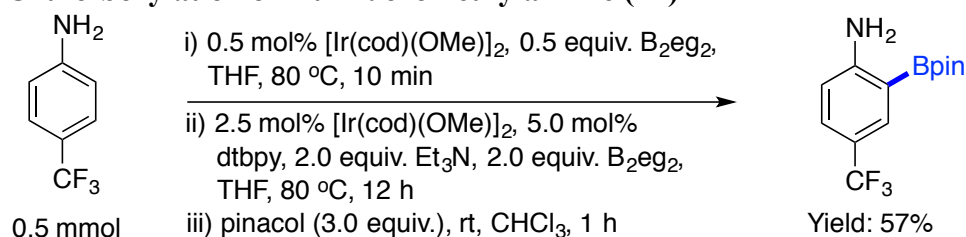

In a glove box, a 5.0 mL Wheaton microreactor was charged with  $[\text{Ir}(\text{cod})(\text{OMe})]_2$  (1.65 mg, 0.5 mol %),  $\text{B}_2\text{eg}_2$  (35.5 mg, 0.5 equiv.), 4-trifluoromethylaniline (80.6 mg, 0.5 mmol), dry THF (0.5 mL) and stirred in a preheated aluminum block at 80 °C for 10 min. The microreactor was charged again with  $[\text{Ir}(\text{cod})(\text{OMe})]_2$  (8.28 mg, 2.5 mol %), dtbpy (6.7 mg, 5.0 mol %),  $\text{B}_2\text{eg}_2$  (142.0 mg, 2.0 equiv.),  $\text{Et}_3\text{N}$  (139.0  $\mu\text{L}$ , 2.0 equiv.) and dry THF (1.0 mL). The microreactor was capped with a teflon pressure cap and placed into a preheated aluminum block at 80 °C. After 12 h, THF was removed under reduced pressure using dry  $\text{CHCl}_3$  as transferring solvent and transesterification was performed using dry  $\text{CHCl}_3$  (4.0 mL) and pinacol (177.0 mg, 3.0 equiv.) at room temperature for 1 h. Removal of solvent under reduced pressure and chromatographic separation with silica gel (1% EtOAc in hexane as eluent) gave 82.0 mg of ortho-borylated 4-trifluoromethylaniline (57%) as a solid (mp = 110-113 °C). Spectral data are in accordance with the reported data.<sup>3</sup>

### Ortho-borylation of 4-methoxyaniline (2o)

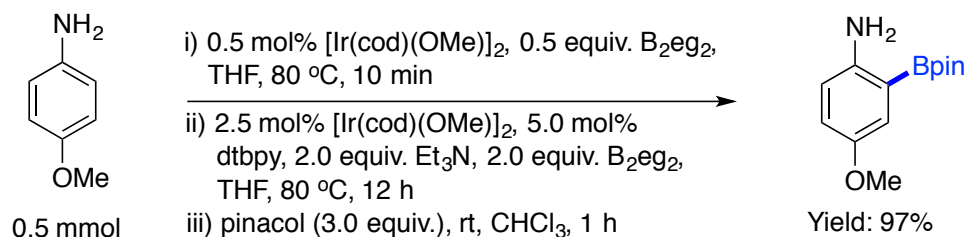

In a glove box, a 5.0 mL Wheaton microreactor was charged with  $[\text{Ir}(\text{cod})(\text{OMe})]_2$  (1.65 mg, 0.5 mol %),  $\text{B}_2\text{eg}_2$  (35.5 mg, 0.5 equiv.), 4-methoxyaniline (61.6 mg, 0.5 mmol), dry THF (0.5 mL) and stirred in a preheated aluminum block at 80 °C for 10 min. The microreactor was charged again with  $[\text{Ir}(\text{cod})(\text{OMe})]_2$  (8.28 mg, 2.5 mol %), dtbpy (6.7 mg, 5.0 mol %),  $\text{B}_2\text{eg}_2$  (142.0 mg, 2.0 equiv.),  $\text{Et}_3\text{N}$  (139.0  $\mu\text{L}$ , 2.0 equiv.) and dry THF (1.0 mL). The microreactor was capped with a teflon pressure cap and placed into a preheated aluminum block at 80 °C. After 12 h, THF was removed under reduced pressure using dry  $\text{CHCl}_3$  as transferring solvent and transesterification was performed using dry  $\text{CHCl}_3$  (4.0 mL) and pinacol (177.0 mg, 3.0 equiv.) at room temperature for 1 h. Removal of solvent under reduced pressure and chromatographic separation with silica gel (5% EtOAc in hexane as eluent) gave 120.0 mg of ortho-borylated 4-methoxyaniline (97%) as a white solid (mp = 73-74 °C). Spectral data are in accordance with the reported data.<sup>3</sup>

### Ortho-borylation of 4-aminobenzonitrile (2p)

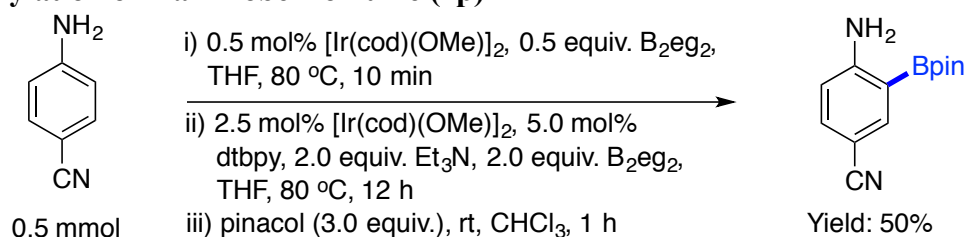

In a glove box, a 5.0 mL Wheaton microreactor was charged with  $[\text{Ir}(\text{cod})(\text{OMe})]_2$  (1.65 mg, 0.5 mol %),  $\text{B}_2\text{eg}_2$  (35.5 mg, 0.5 equiv.), 4-aminobenzonitrile (59.1 mg, 0.5 mmol), dry THF (0.5 mL) and stirred in a preheated aluminum block at 80 °C for 10 min. The microreactor was charged again with  $[\text{Ir}(\text{cod})(\text{OMe})]_2$  (8.28 mg, 2.5 mol %), dtbpy (6.7 mg, 5.0 mol %),  $\text{B}_2\text{eg}_2$  (142.0 mg, 2.0 equiv.),  $\text{Et}_3\text{N}$  (139.0  $\mu\text{L}$ , 2.0 equiv.) and dry THF (1.0 mL). The microreactor was capped with a teflon pressure cap and placed into a preheated aluminum block at 80 °C. After 12 h, THF was removed under reduced pressure using dry  $\text{CHCl}_3$  as transferring solvent and transesterification was performed using dry  $\text{CHCl}_3$  (4.0 mL) and pinacol (177.0 mg, 3.0 equiv.) at room temperature for 1 h. Removal of solvent under reduced pressure and chromatographic separation with silica gel (5% EtOAc in hexane as eluent) gave 61.0 mg of ortho-borylated 4-aminobenzonitrile (50%) as a white solid (mp = 96-97 °C). Spectral data are in accordance with the reported data.<sup>3</sup>

### Ortho-borylation of 4-fluoroaniline (2q)

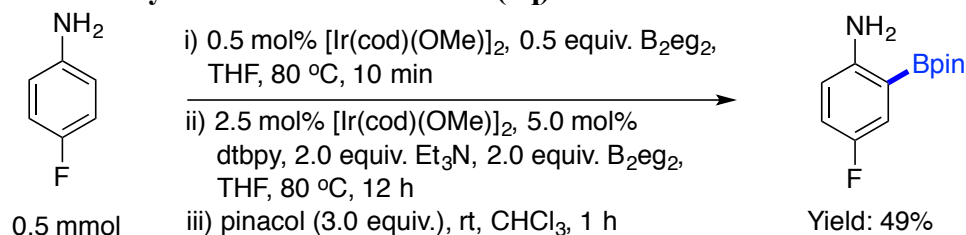

In a glove box, a 5.0 mL Wheaton microreactor was charged with [Ir(cod)(OMe)]<sub>2</sub> (1.65 mg, 0.5 mol %), B<sub>2</sub>eg<sub>2</sub> (35.5 mg, 0.5 equiv.), 4-fluoroaniline (61.6 mg, 0.5 mmol), dry THF (0.5 mL) and stirred in a preheated aluminum block at 80 °C for 10 min. The microreactor was charged again with [Ir(cod)(OMe)]<sub>2</sub> (8.28 mg, 2.5 mol %), dtbpy (6.7 mg, 5.0 mol %), B<sub>2</sub>eg<sub>2</sub> (142.0 mg, 2.0 equiv.), Et<sub>3</sub>N (139.0 μL, 2.0 equiv.) and dry THF (1.0 mL). The microreactor was capped with a teflon pressure cap and placed into a preheated aluminum block at 80 °C. After 12 h, THF was removed under reduced pressure using dry CHCl<sub>3</sub> as transferring solvent and transesterification was performed using dry CHCl<sub>3</sub> (4.0 mL) and pinacol (177.0 mg, 3.0 equiv.) at room temperature for 1 h. Analyzing the crude reaction mixture, it was observed that 20% *o,o*-di-borylation, however, due to minor amount, it was not isolated. Removal of solvent under reduced pressure and chromatographic separation with silica gel (1% EtOAc in hexane as eluent) gave 58.0 mg of ortho-borylated 4-fluoroaniline (49%) as a white solid (mp = 29-30 °C). Spectral data are in accordance with the reported data.<sup>3</sup>

### Ortho-borylation of 4-phenylaniline (2r)

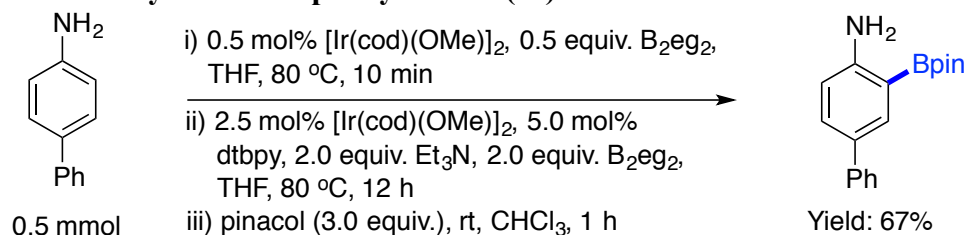

In a glove box, a 5.0 mL Wheaton microreactor was charged with  $[\text{Ir}(\text{cod})(\text{OMe})]_2$  (1.65 mg, 0.5 mol %),  $\text{B}_2\text{eg}_2$  (35.5 mg, 0.5 equiv.), 4-phenylaniline (84.6 mg, 0.5 mmol), dry THF (0.5 mL) and stirred in a preheated aluminum block at 80 °C for 10 min. The microreactor was charged again with  $[\text{Ir}(\text{cod})(\text{OMe})]_2$  (8.28 mg, 2.5 mol %), dtbpy (6.7 mg, 5.0 mol %),  $\text{B}_2\text{eg}_2$  (142.0 mg, 2.0 equiv.),  $\text{Et}_3\text{N}$  (139.0  $\mu\text{L}$ , 2.0 equiv.) and dry THF (1.0 mL). The microreactor was capped with a teflon pressure cap and placed into a preheated aluminum block at 80 °C. After 12 h, THF was removed under reduced pressure using dry  $\text{CHCl}_3$  as transferring solvent and transesterification was performed using dry  $\text{CHCl}_3$  (4.0 mL) and pinacol (177.0 mg, 3.0 equiv.) at room temperature for 1 h. Removal of solvent under reduced pressure and chromatographic separation with silica gel (1% EtOAc in hexane as eluent) gave 99.0 mg of ortho-borylated 4-phenylaniline (67%) as a white solid (mp = 146-147 °C).

$^1\text{H}$  NMR (400 MHz,  $\text{CDCl}_3$ ):  $\delta$  7.89 (d,  $J$  = 2.4 Hz, 1H), 7.57 (d,  $J$  = 7.2 Hz, 2H), 7.49 (dd,  $J$  = 8.4 Hz,  $J$  = 2.4 Hz, 1H), 7.38 (t,  $J$  = 7.2 Hz, 2H), 7.24 (t,  $J$  = 6.8 Hz, 1H), 6.68 (d,  $J$  = 8.4 Hz, 1H), 4.83 (bs, 2H), 1.36 (s, 12H).

$^{13}\text{C}$  NMR (100 MHz,  $\text{CDCl}_3$ ):  $\delta$  153.1, 141.2, 135.3, 131.5, 129.8, 128.5, 126.4, 125.9, 115.2, 83.6, 24.9.

$^{11}\text{B}$  NMR (128 MHz,  $\text{CDCl}_3$ ):  $\delta$  31.4.

HRMS (ESI)  $m/z$  calcd for  $\text{C}_{18}\text{H}_{23}\text{BNO}_2$   $[\text{M}+\text{H}]^+$  296.1822, found: 296.1818.

## Ortho-borylation of 4-nitroaniline (2s)

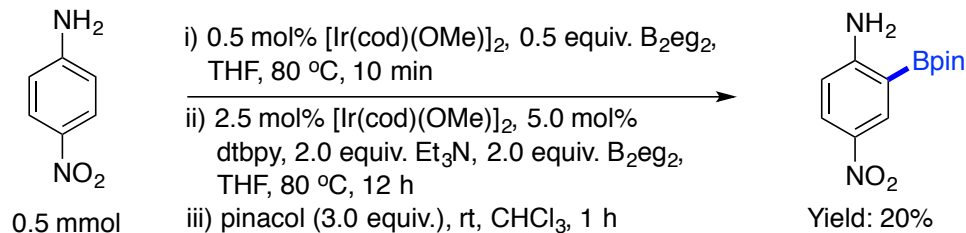

In a glove box, a 5.0 mL Wheaton microreactor was charged with  $[\text{Ir}(\text{cod})(\text{OMe})]_2$  (1.65 mg, 0.5 mol %),  $\text{B}_2\text{eg}_2$  (35.5 mg, 0.5 equiv.), 4-nitroaniline (69.1 mg, 0.5 mmol), dry THF (0.5 mL) and stirred in a preheated aluminum block at 80 °C for 10 min. The microreactor was charged again with  $[\text{Ir}(\text{cod})(\text{OMe})]_2$  (8.28 mg, 2.5 mol %), dtbpy (6.7 mg, 5.0 mol %),  $\text{B}_2\text{eg}_2$  (142.0 mg, 2.0 equiv.),  $\text{Et}_3\text{N}$  (139.0  $\mu\text{L}$ , 2.0 equiv.) and dry THF (1.0 mL). The microreactor was capped with a teflon pressure cap and placed into a preheated aluminum block at 80 °C. After 12 h, THF was removed under reduced pressure using dry  $\text{CHCl}_3$  as transferring solvent and transesterification was performed using dry  $\text{CHCl}_3$  (4.0 mL) and pinacol (177.0 mg, 3.0 equiv.) at room temperature for 1 h. Analyzing the crude mixture, it was found that the GC conversion of the product was 50%, but during isolation via chromatographic separation with silica gel (1% EtOAc in hexane as eluent) 26.4 mg of ortho-borylated 4-nitroaniline (20%) was obtained as a yellow solid (mp = 159-160 °C).

$^1\text{H}$  NMR (800 MHz,  $\text{CDCl}_3$ ):  $\delta$  8.54 (d,  $J$  = 2.4 Hz, 1H), 8.07 (dd,  $J$  = 8.8 Hz,  $J$  = 2.4 Hz, 1H), 6.53 (d,  $J$  = 8.8 Hz, 1H), 5.52 (bs, 2H), 1.35 (s, 12H).

$^{13}\text{C}$  NMR (200 MHz,  $\text{CDCl}_3$ ):  $\delta$  158.6, 137.9, 134.2, 128.8, 113.7, 84.4, 24.9.

$^{11}\text{B}$  NMR (128 MHz,  $\text{CDCl}_3$ ):  $\delta$  38.3.

HRMS (ESI)  $m/z$  calcd for  $\text{NaC}_{12}\text{H}_{17}\text{BN}_2\text{O}_4$   $[\text{M}+\text{Na}]^+$  287.1179, found: 287.1170.

## Ortho-borylation of 2-methyl-4-methoxyaniline (2t)

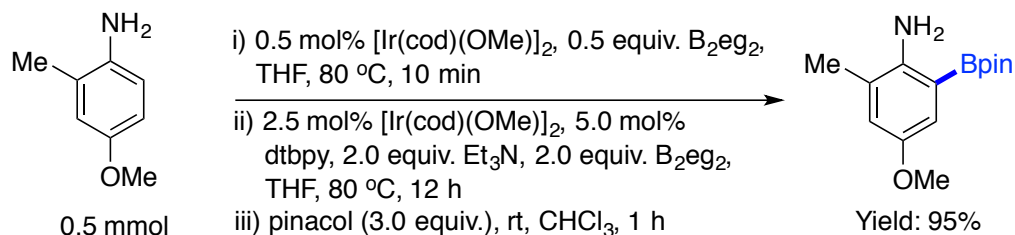

In a glove box, a 5.0 mL Wheaton microreactor was charged with  $[\text{Ir}(\text{cod})(\text{OMe})]_2$  (1.65 mg, 0.5 mol %),  $\text{B}_2\text{eg}_2$  (35.5 mg, 0.5 equiv.), 2-methyl-4-methoxyaniline (68.6 mg, 0.5 mmol), dry THF (0.5 mL) and stirred in a preheated aluminum block at 80 °C for 10 min. The microreactor was charged again with  $[\text{Ir}(\text{cod})(\text{OMe})]_2$  (8.28 mg, 2.5 mol %), dtbpy (6.7 mg, 5.0 mol %),  $\text{B}_2\text{eg}_2$  (142.0 mg, 2.0 equiv.),  $\text{Et}_3\text{N}$  (139.0  $\mu\text{L}$ , 2.0 equiv.) and dry THF (1.0 mL). The microreactor was capped with a teflon pressure cap and placed into a preheated aluminum block at 80 °C. After 12 h, THF was removed under reduced pressure using dry  $\text{CHCl}_3$  as transferring solvent and transesterification was performed using dry  $\text{CHCl}_3$  (4.0 mL) and pinacol (177.0 mg, 3.0 equiv.) at room temperature for 1 h. Removal of solvent under reduced pressure and chromatographic separation with silica gel (5% EtOAc in hexane as eluent) gave 125.0 mg of ortho-borylated 2-methyl-4-methoxyaniline (95%) as a solid (mp = 65-66 °C).

$^1\text{H}$  NMR (400 MHz,  $\text{CDCl}_3$ ):  $\delta$  7.05 (d,  $J$  = 3.2 Hz, 1H), 6.79 (d,  $J$  = 3.2 Hz 1H), 4.49 (bs, 2H), 3.76 (s, 3H), 2.13 (s, 3H), 1.34 (s, 12H).

$^{13}\text{C}$  NMR (100 MHz,  $\text{CDCl}_3$ ):  $\delta$  151.1, 146.1, 123.7, 121.8, 117.0, 83.6, 55.8, 24.9, 17.8.

$^{11}\text{B}$  NMR (128 MHz,  $\text{CDCl}_3$ ):  $\delta$  30.9.

HRMS (ESI)  $m/z$  calcd for  $\text{C}_{14}\text{H}_{23}\text{BNO}_3$   $[\text{M}+\text{H}]^+$  264.1771, found: 264.1764.

## Ortho-borylation of 3,4-dimethoxyaniline (2u)

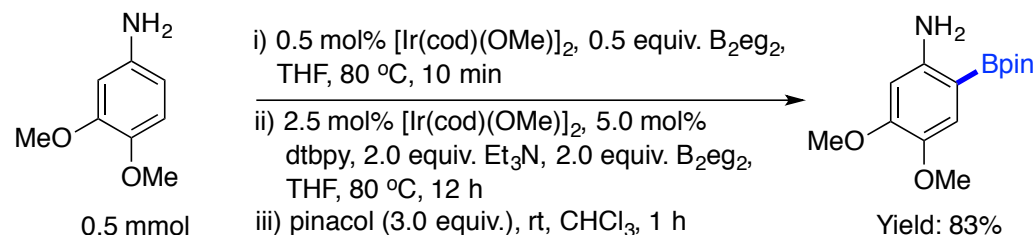

In a glove box, a 5.0 mL Wheaton microreactor was charged with  $[\text{Ir}(\text{cod})(\text{OMe})]_2$  (1.65 mg, 0.5 mol %),  $\text{B}_2\text{eg}_2$  (35.5 mg, 0.5 equiv.), 3,4-dimethoxyaniline (76.6 mg, 0.5 mmol), dry THF (0.5 mL) and stirred in a preheated aluminum block at 80 °C for 10 min. The microreactor was charged again with  $[\text{Ir}(\text{cod})(\text{OMe})]_2$  (8.28 mg, 2.5 mol %), dtbpy (6.7 mg, 5.0 mol %),  $\text{B}_2\text{eg}_2$  (142.0 mg, 2.0 equiv.),  $\text{Et}_3\text{N}$  (139.0  $\mu\text{L}$ , 2.0 equiv.) and dry THF (1.0 mL). The microreactor was capped with a teflon pressure cap and placed into a preheated aluminum block at 80 °C. After 12 h, THF was removed under reduced pressure using dry  $\text{CHCl}_3$  as transferring solvent and transesterification was performed using dry  $\text{CHCl}_3$  (4.0 mL) and pinacol (177.0 mg, 3.0 equiv.) at room temperature for 1 h. Removal of solvent under reduced pressure and chromatographic separation with silica gel (5% EtOAc in hexane as eluent) gave 116.0 mg of ortho-borylated 3,4-dimethoxyaniline (83%) as a solid (mp = 124-125 °C).

$^1\text{H}$  NMR (400 MHz,  $\text{CDCl}_3$ ):  $\delta$  7.07 (s, 1H), 6.18 (s, 1H), 4.56 (bs, 2H), 3.84 (s, 3H), 3.83 (s, 3H), 1.33 (s, 12H).

$^{13}\text{C}$  NMR (100 MHz,  $\text{CDCl}_3$ ):  $\delta$  153.2, 149.5, 141.1, 118.5, 99.3, 83.3, 56.5, 55.6, 24.9.

$^{11}\text{B}$  NMR (128 MHz,  $\text{CDCl}_3$ ):  $\delta$  31.5.

HRMS (ESI)  $m/z$  calcd for  $\text{C}_{14}\text{H}_{23}\text{BNO}_4$   $[\text{M}+\text{H}]^+$  280.1720, found: 280.1714.

### Ortho-borylation of 3,4-ethylenedioxy aniline (2v)

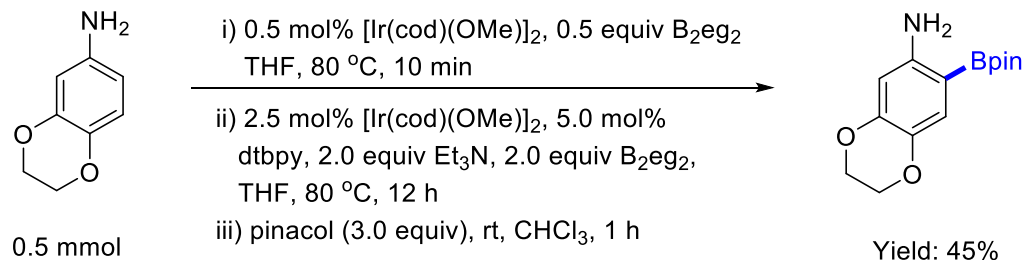

In a glove box, a 5.0 mL Wheaton microreactor was charged with  $[\text{Ir}(\text{cod})(\text{OMe})]_2$  (1.65 mg, 0.5 mol %),  $\text{B}_2\text{eg}_2$  (35.5 mg, 0.5 equiv.), 3,4-ethylenedioxy aniline (75.6 mg, 0.5 mmol), dry THF (0.5 mL) and stirred in a preheated aluminum block at 80 °C for 10 min. The microreactor was charged again with  $[\text{Ir}(\text{cod})(\text{OMe})]_2$  (8.28 mg, 2.5 mol %), dtbpy (6.7 mg, 5.0 mol %),  $\text{B}_2\text{eg}_2$  (142.0 mg, 2.0 equiv.),  $\text{Et}_3\text{N}$  (139.0  $\mu\text{L}$ , 2.0 equiv.) and dry THF (1.0 mL). The microreactor was capped with a teflon pressure cap and placed into a preheated aluminum block at 80 °C. After 12 h, THF was removed under reduced pressure using dry  $\text{CHCl}_3$  as transferring solvent and transesterification was performed using dry  $\text{CHCl}_3$  (4.0 mL) and pinacol (177.0 mg, 3.0 equiv.) at room temperature for 1 h. Removal of solvent under reduced pressure and chromatographic separation with silica gel (10% EtOAc in hexane as eluent) gave 62.0 mg of ortho-borylated 3,4-ethylenedioxy aniline (45%) as a solid (mp = 49-51 °C).

$^1\text{H}$  NMR (400 MHz,  $\text{CDCl}_3$ ):  $\delta$  7.13 (s, 1H), 6.13 (s, 1H), 4.44 (bs, 2H), 4.21-4.24 (m, 2H), 4.14-4.17 (m, 2H), 1.31 (s, 12H).

$^{13}\text{C}$  NMR (100 MHz,  $\text{CDCl}_3$ ):  $\delta$  148.8, 147.5, 135.6, 125.9, 124.3, 102.9, 83.3, 64.9, 63.9, 24.8.

$^{11}\text{B}$  NMR (128 MHz,  $\text{CDCl}_3$ ):  $\delta$  30.7.

HRMS (ESI)  $m/z$  calcd for  $\text{C}_{14}\text{H}_{21}\text{BNO}_4$   $[\text{M}+\text{H}]^+$  278.1564, found: 278.1557.

### Ortho-borylation of 2,4-dimethoxyaniline (2w)

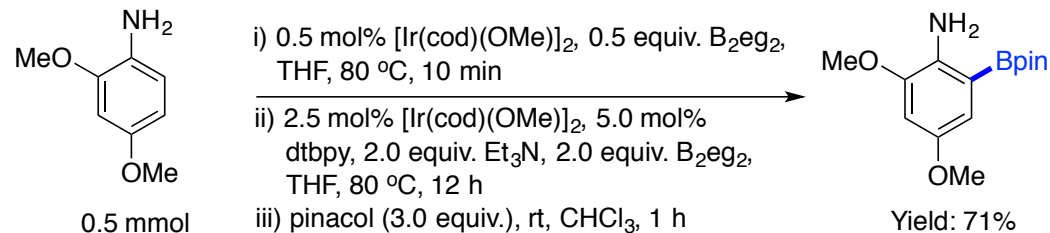

In a glove box, a 5.0 mL Wheaton microreactor was charged with  $[\text{Ir}(\text{cod})(\text{OMe})]_2$  (1.65 mg, 0.5 mol %),  $\text{B}_2\text{eg}_2$  (35.5 mg, 0.5 equiv.), 2,4-dimethoxyaniline (76.6 mg, 0.5 mmol), dry THF (0.5 mL) and stirred in a preheated aluminum block at 80 °C for 10 min. The microreactor was charged again with  $[\text{Ir}(\text{cod})(\text{OMe})]_2$  (8.28 mg, 2.5 mol %), dtbpy (6.7 mg, 5.0 mol %),  $\text{B}_2\text{eg}_2$  (142.0 mg, 2.0 equiv.),  $\text{Et}_3\text{N}$  (139.0  $\mu\text{L}$ , 2.0 equiv.) and dry THF (1.0 mL). The microreactor was capped with a teflon pressure cap and placed into a preheated aluminum block at 80 °C. After 12 h, THF was removed under reduced pressure using dry  $\text{CHCl}_3$  as transferring solvent and transesterification was performed using dry  $\text{CHCl}_3$  (4.0 mL) and pinacol (177.0 mg, 3.0 equiv.) at room temperature for 1 h. Removal of solvent under reduced pressure and chromatographic separation with silica gel (5% EtOAc in hexane as eluent) gave 99.0 mg of ortho-borylated 2,4-dimethoxyaniline (71%) as a solid (mp = 69-71 °C).

$^1\text{H}$  NMR (400 MHz,  $\text{CDCl}_3$ ):  $\delta$  6.71 (d,  $J$  = 2.4 Hz, 1H), 6.52 (d,  $J$  = 2.8 Hz 1H), 4.68 (bs, 2H), 3.81 (s, 3H), 3.78 (s, 3H), 1.34 (s, 12H).

$^{13}\text{C}$  NMR (100 MHz,  $\text{CDCl}_3$ ):  $\delta$  151.1, 147.7, 138.4, 108.4, 103.3, 83.5, 55.8, 55.5, 24.9.

$^{11}\text{B}$  NMR (128 MHz,  $\text{CDCl}_3$ ):  $\delta$  31.2.

HRMS (ESI)  $m/z$  calcd for  $\text{C}_{14}\text{H}_{23}\text{BNO}_4$   $[\text{M}+\text{H}]^+$  280.1720, found: 280.1712.

### Ortho-borylation at 7-position of 2-methylquinolin-6-amine (2x):

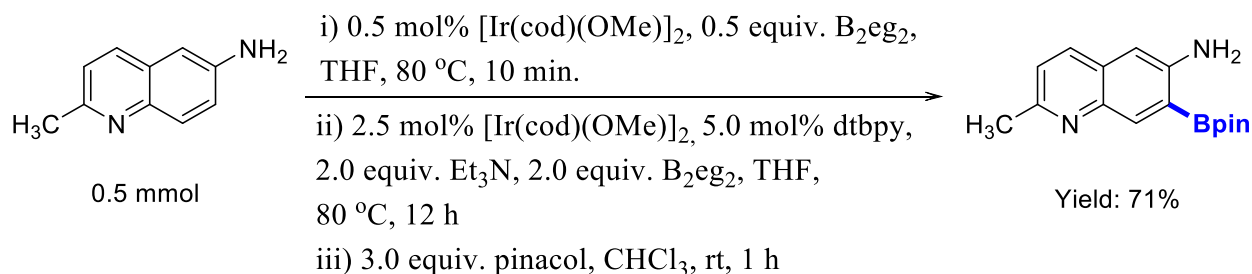

In a glove box, a 5.0 mL Wheaton microreactor was charged with [Ir(cod)(OMe)]<sub>2</sub> (1.65 mg, 0.5 mol %), B<sub>2</sub>eg<sub>2</sub> (35.5 mg, 0.5 equiv.), 2-methylquinolin-6-amine (31.6 mg, 0.5 mmol), dry THF (0.5 mL) and stirred in a preheated aluminum block at 80 °C for 10 min. The microreactor was charged again with [Ir(cod)(OMe)]<sub>2</sub> (8.28 mg, 2.5 mol %), dtbpy (6.7 mg, 5.0 mol %), B<sub>2</sub>eg<sub>2</sub> (142.0 mg, 2.0 equiv.), Et<sub>3</sub>N (139.0 μL, 2.0 equiv.) and dry THF (1.0 mL). The microreactor was capped with a teflon pressure cap and placed into a preheated aluminum block at 80 °C. After 12 h, THF was removed under reduced pressure using dry CHCl<sub>3</sub> as transferring solvent and transesterification was performed using dry CHCl<sub>3</sub> (4.0 mL) and pinacol (177.0 mg, 3.0 equiv.) at room temperature for 1 h. Removal of solvent under reduced pressure and chromatographic separation with silica gel (10% EtOAc in hexane as eluent) gave 100.8 mg of 7-borylated 2-methylquinolin-6-amine (71%) as a solid (mp = 62-63 °C).

<sup>1</sup>H NMR (400 MHz, CDCl<sub>3</sub>): δ 8.40 (s, 1H), 7.72 (d, *J* = 8.4 Hz, 1H), 7.12 (d, *J* = 8.4 Hz, 1H), 6.77 (s, 1H), 4.80 (bs, 2H), 2.63 (s, 3H), 1.36 (s, 12H).

<sup>13</sup>C NMR (100 MHz, CDCl<sub>3</sub>): δ 154.7, 149.2, 141.7, 139.0, 133.6, 130.0, 123.1, 106.9, 83.9, 25.0, 24.9.

<sup>11</sup>B NMR (128 MHz, CDCl<sub>3</sub>): δ 30.2.

HRMS (ESI) *m/z* calcd for C<sub>16</sub>H<sub>22</sub>BN<sub>2</sub>O<sub>2</sub> [M+H]<sup>+</sup> 285.1774, found: 285.1752.

### Borylation at 2-position of 1H-indole (2y):

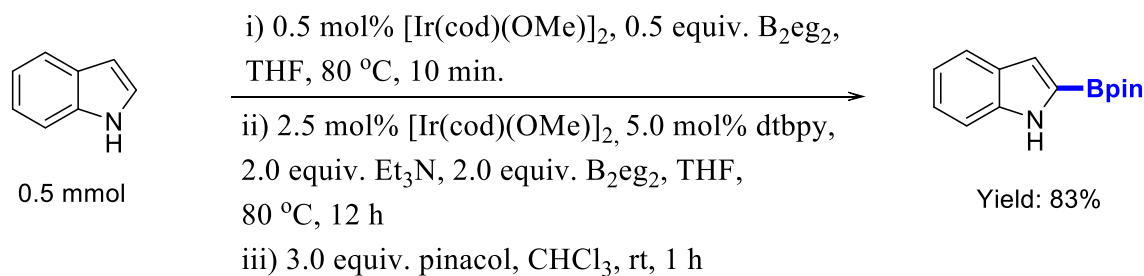

In a glove box, a 5.0 mL Wheaton microreactor was charged with  $[\text{Ir}(\text{cod})(\text{OMe})]_2$  (1.65 mg, 0.5 mol %),  $\text{B}_2\text{eg}_2$  (35.5 mg, 0.5 equiv.), 1H-indole (58.5 mg, 0.5 mmol), dry THF (0.5 mL) and stirred in a preheated aluminum block at 80 °C for 10 min. The microreactor was charged again with  $[\text{Ir}(\text{cod})(\text{OMe})]_2$  (8.28 mg, 2.5 mol %), dtbpy (6.7 mg, 5.0 mol %),  $\text{B}_2\text{eg}_2$  (142.0 mg, 2.0 equiv.),  $\text{Et}_3\text{N}$  (139.0  $\mu\text{L}$ , 2.0 equiv.) and dry THF (1.0 mL). The microreactor was capped with a teflon pressure cap and placed into a preheated aluminum block at 80 °C. After 12 h, THF was removed under reduced pressure using dry  $\text{CHCl}_3$  as transferring solvent and transesterification was performed using dry  $\text{CHCl}_3$  (4.0 mL) and pinacol (177.0 mg, 3.0 equiv.) at room temperature for 1 h. Removal of solvent under reduced pressure and chromatographic separation with silica gel (5% EtOAc in hexane as eluent) gave 100.8 mg of 2-borylated 1H-indole (83%) as a white solid (mp = 85-86 °C). Spectral data are in accordance with the reported data.<sup>4</sup>

### Large scale ortho-borylation of aniline:

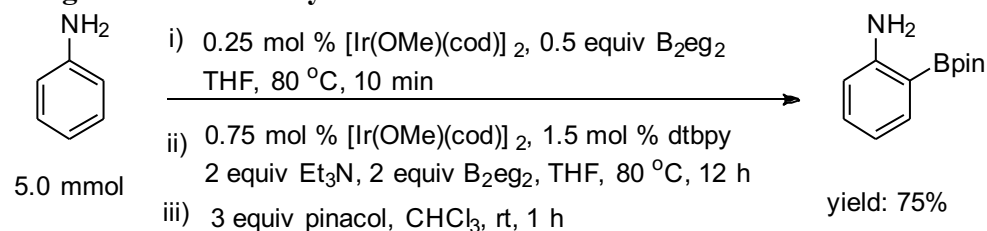

#### Lower Catalyst loading

Total Ir: 0.5+1.5 = 2.0 mol %

In a glove box, a 15 mL pressure tube was charged with [Ir(cod)(OMe)]<sub>2</sub> (8.3 mg, 0.25 mol %), B<sub>2</sub>eg<sub>2</sub> (355 mg, 0.5 equiv.), aniline (465.6 mg, 5.0 mmol), dry THF (5.0 mL) and stirred on a preheated oil bath at 80 °C for 10 min. The pressure tube was charged again with [Ir(cod)(OMe)]<sub>2</sub> (24.86 mg, 0.75 mol %), dtbpy (20.13 mg, 1.5 mol %), B<sub>2</sub>eg<sub>2</sub> (1.42 g, 2.0 equiv.), Et<sub>3</sub>N (1.39 mL, 2.0 equiv.) and dry THF (6.0 mL). The Pressure tube was capped with a teflon pressure cap and placed into a preheated oil bath at 80 °C. After 12 h, THF was removed under reduced pressure using dry CHCl<sub>3</sub> as transferring solvent and transesterification was performed using dry CHCl<sub>3</sub> (10.0 mL) and pinacol (1.77 g, 3.0 equiv.) at room temperature for 1 h. Removal of solvent under reduced pressure and chromatographic separation with silica gel (1% EtOAc in hexane as eluent) gave 821 mg of ortho-borylated aniline (75%) as a solid. Spectral data are in accordance with the reported data.<sup>5</sup>

**Ortho-borylation of *N*-methylaniline same conditions as Table 1:**

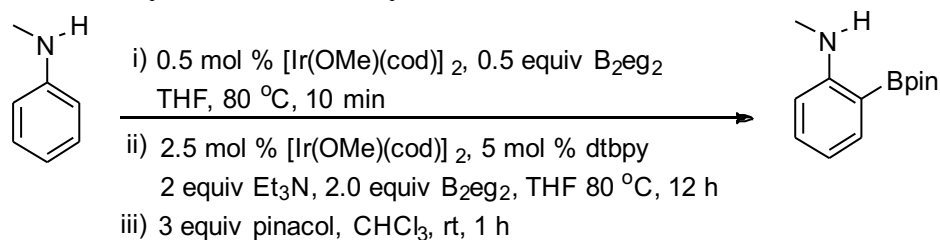

In a glove box, a 5.0 mL Wheaton microreactor was charged with  $[\text{Ir}(\text{cod})(\text{OMe})]_2$  (3.3 mg, 0.5 mol %),  $\text{B}_2\text{eg}_2$  (70.8 mg, 0.5 equiv.), *N*-methylaniline (107.2 mg, 1.0 mmol, 1 equiv), dry THF (1.0 mL) and stirred in a preheated aluminum block at 80 °C for 10 min. The microreactor was charged again with  $[\text{Ir}(\text{cod})(\text{OMe})]_2$  (16.5 mg, 2.5 mol %), dtbpy (13.4 mg, 5.0 mol %),  $\text{B}_2\text{eg}_2$  (283.0 mg, 2.0 equiv.),  $\text{Et}_3\text{N}$  (202.3 mg, 2.0 equiv.) and dry THF (4.0 mL). The microreactor was capped with a Teflon pressure cap and placed into a preheated aluminum block at 80 °C. After 12 h, THF was removed under reduced pressure using dry  $\text{CHCl}_3$  as transferring solvent and transesterification was performed using dry  $\text{CHCl}_3$  (4.0 mL) and pinacol (355.0 mg, 3.0 equiv.) at room temperature for 1 h. Removal of solvent under reduced pressure and chromatographic separation with silica gel (1% EtOAc in hexane to 5% EtOAc in hexane as eluent) gave 49.3 mg of ortho-borylated *N*-methylaniline (21%) as a solid. Spectra data are in accordance with reported data.<sup>6</sup> It should be noted that by GC ortho-borylation is the only mono-borylated product and conversion was 24%. A trace amount of diborylated material was observed on the GCMS. The remainder of the mass was unreacted starting material.

**Ortho-borylation of *N*-methylaniline (eq 1):**

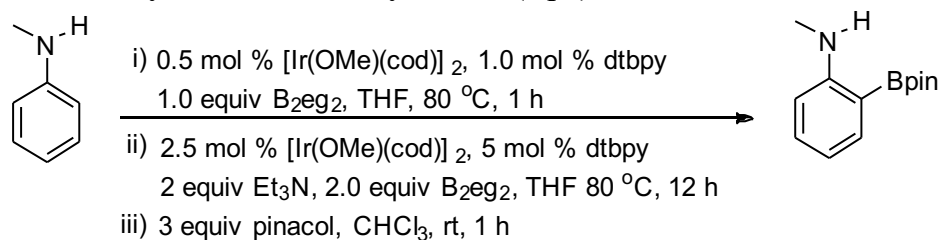

In a glove box, a 5.0 mL Wheaton microreactor was charged with [Ir(cod)(OMe)]<sub>2</sub> (1.7 mg, 0.5 mol %), B<sub>2</sub>eg<sub>2</sub> (70.8 mg, 1.0 equiv.), dtbpy (1.3 mg, 1 mol %) *N*-methylaniline (53.5 mg, 0.5 mmol, 1 equiv), dry THF (1.0 mL) and stirred in a preheated aluminum block at 80 °C for 1 h. The microreactor was charged again with [Ir(cod)(OMe)]<sub>2</sub> (8.3 mg, 2.5 mol %), dtbpy (6.7 mg, 5.0 mol %), B<sub>2</sub>eg<sub>2</sub> (141.7 mg, 2.0 equiv.), Et<sub>3</sub>N (101.2 mg, 2.0 equiv.) and dry THF (3.0 mL). The microreactor was capped with a Teflon pressure cap and placed into a preheated aluminum block at 80 °C. After 12 h, THF was removed under reduced pressure using dry CHCl<sub>3</sub> as transferring solvent and transesterification was performed using dry CHCl<sub>3</sub> (4.0 mL) and pinacol (177.2 mg, 3.0 equiv.) at room temperature for 1h. GC showed only the ortho-borylated product in 29% conversion and a trace of diborylation. The remainder of the mass was unreacted starting material.

### ***N*-Borylation of *N*-methylaniline with dtbpy:**

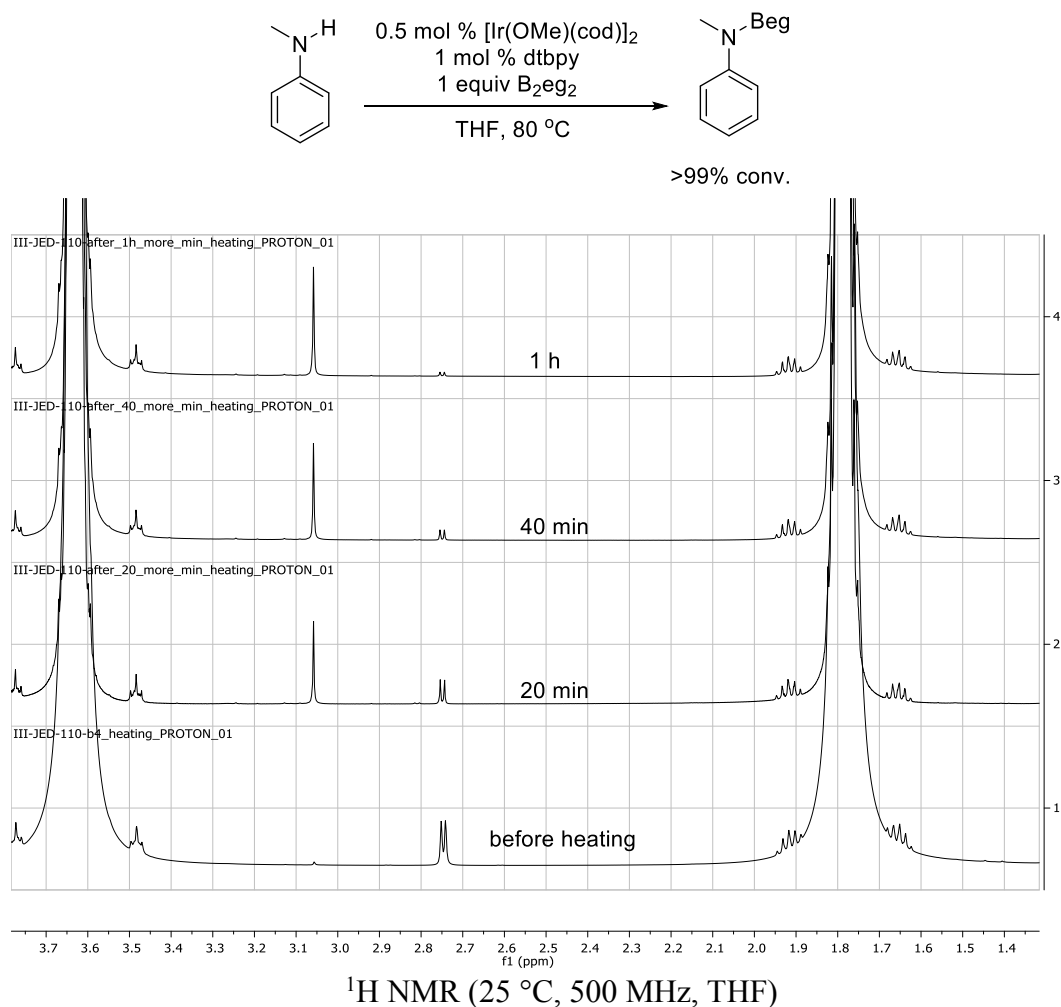

In a nitrogen filled glove box, a stock solution of [Ir(OMe)(cod)]<sub>2</sub> was prepared by dissolving 3.3 mg in 0.5 mL THF and a stock solution of dtbpy was prepared by dissolving 2.7 mg in 0.5 mL THF. *N*-Methylaniline (10.7 mg, 0.1 mmol, 1.0 equiv) and B<sub>2</sub>eg<sub>2</sub> (7.1 mg, 0.05 mmol, 0.5 equiv) were dissolved in 0.4 mL deuterated THF respectively. The *N*-methylaniline and B<sub>2</sub>eg<sub>2</sub> were transferred to a J-Young tube after which 0.05 mL of the stock [Ir(OMe)(cod)]<sub>2</sub> (0.5 mol %) and stock dtbpy (1 mol %) was added. Finally, three drops of THF-d<sub>8</sub> was added to enable locking. The J-Young tube sealed and removed from the glove box. <sup>1</sup>H NMR was immediately collected. The NMR tube was then heated at 20 min increments after which NMR was collected. The <sup>1</sup>H spectra show a new *N*-Methyl peak growing at 3.06 ppm as a singlet and in the <sup>11</sup>B NMR *N*-B bond formation via a broad singlet at 25.27 ppm. Over 1 h this conversion was complete.

***N*-Borylation of *N*-methylaniline with table 1 conditions:**

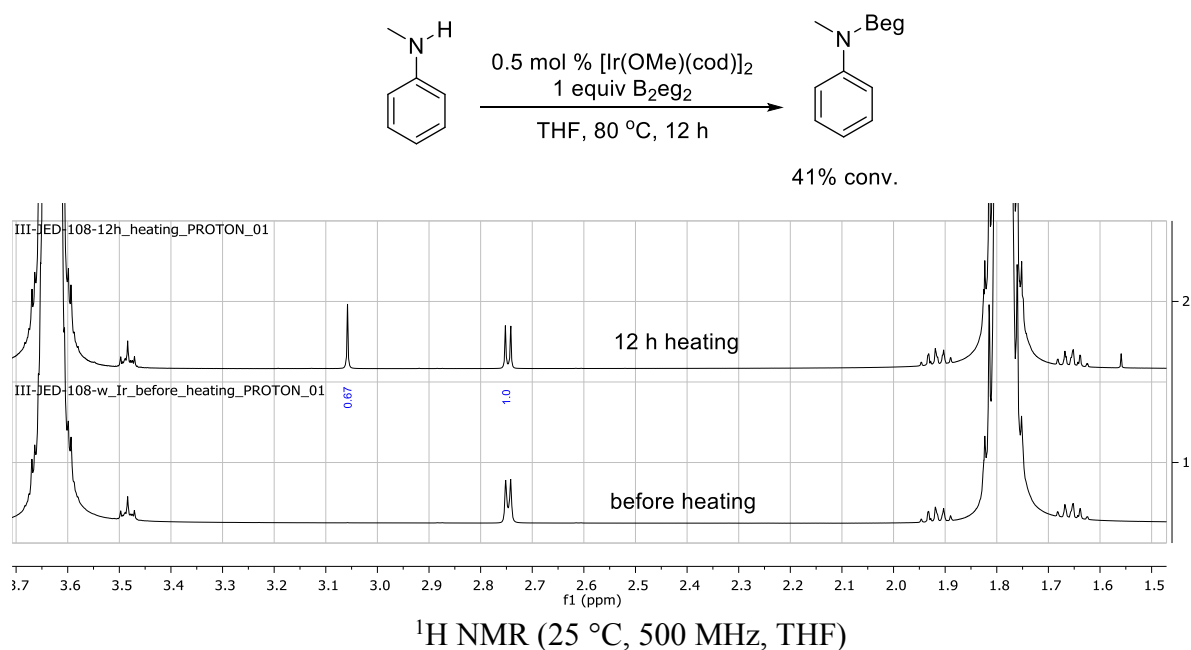

In a nitrogen filled glove box, a stock solution of  $[\text{Ir}(\text{OMe})(\text{cod})]_2$  was prepared by dissolving 3.3 mg in 0.5 mL THF. *N*-Methylaniline (10.7 mg, 0.1 mmol, 1.0 equiv) and  $\text{B}_2\text{eg}_2$  (7.1 mg, 0.05 mmol, 0.5 equiv) were dissolved in 0.4 mL deuterated THF respectively. The *N*-methylaniline and  $\text{B}_2\text{eg}_2$  were transferred to a J-Young tube after which 0.05 mL of the stock  $[\text{Ir}(\text{OMe})(\text{cod})]_2$  (0.5 mol %). Finally, three drops of THF- $\text{d}_8$  was added to enable locking. The J-Young tube sealed and removed from the glove box.  $^1\text{H}$  and  $^{11}\text{B}$  NMR were immediately collected. The NMR tube was then heated at 80 °C for 12 h after which NMR was collected. The  $^1\text{H}$  spectra show a new *N*-Methyl peak growing at 3.06 ppm as a singlet and in the  $^{11}\text{B}$  NMR *N*-B bond formation via a broad singlet at 25.27 ppm; however, even after 12 h of heating the conversion was incomplete at only 41% based on  $^1\text{H}$  NMR integration.

### C–H borylation of aniline with B<sub>2</sub>pin<sub>2</sub>

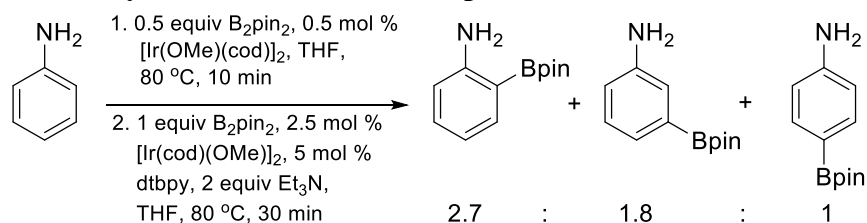

In a glove box, a 5.0 mL Wheaton microreactor was charged with [Ir(cod)(OMe)]<sub>2</sub> (1.65 mg, 0.5 mol %), B<sub>2</sub>pin<sub>2</sub> (64.0 mg, 0.5 equiv.), aniline (47 mg, 0.5 mmol), dry THF (0.5 mL) and stirred in a preheated aluminum block at 80 °C for 10 min. The microreactor was charged again with [Ir(cod)(OMe)]<sub>2</sub> (8.28 mg, 2.5 mol %), dtbpy (6.7 mg, 5.0 mol %), B<sub>2</sub>pin<sub>2</sub> (127.0 mg, 1.0 equiv.), Et<sub>3</sub>N (101 mg, 2.0 equiv.) and dry THF (2.0 mL). The microreactor was capped with a teflon pressure cap and placed into a preheated aluminum block at 80 °C and heated for 30 min. The GC (the aliquot taken from reaction mixture was treated with methanol prior to injection in to GC) showed a mixture of monoborylated products (2.7:1.8:1 o:m:p).

### Synthesis of 4,4,5,5-tetramethyl-*N*-phenyl-1,3,2-dioxaborolan-2-amine (PhN(H)Bpin)

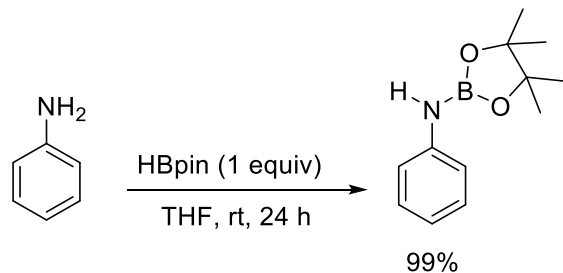

This synthesis was adapted from a previous reported procedure.<sup>7</sup> In a nitrogen filled glove box, a 50 mL Schlenk flask was charged with aniline (1 g, 10.7 mmol, 1 equiv), HBpin (1.374 g, 10.7 mmol, 1 equiv), and dry THF (10 mL). The Schlenk flask was removed from the glove box and allowed to stir under nitrogen for 24 h. After removing the volatiles under reduced pressure, 2.33 g (99%) of a white solid was obtained. It should be noted that this compound is highly hygroscopic and should not be exposed to air.

<sup>1</sup>H NMR (500 MHz, CDCl<sub>3</sub>): δ 7.20 (dd, *J* = 8.5, 7.3 Hz, 2H), 7.11 – 7.05 (m, 2H), 6.85 (td, *J* = 7.3, 1.1 Hz, 1H), 4.62 (bs, 1H), 1.31 (s, 12H).

<sup>13</sup>C NMR (126 MHz, CDCl<sub>3</sub>): δ 143.27, 129.00, 120.07, 117.56, 83.10, 24.64.

<sup>11</sup>B NMR (160 MHz, CDCl<sub>3</sub>): δ 23.23 (bs).

### Regioselectivity of C–H borylation of PhN(H)Bpin with B<sub>2</sub>eg<sub>2</sub>

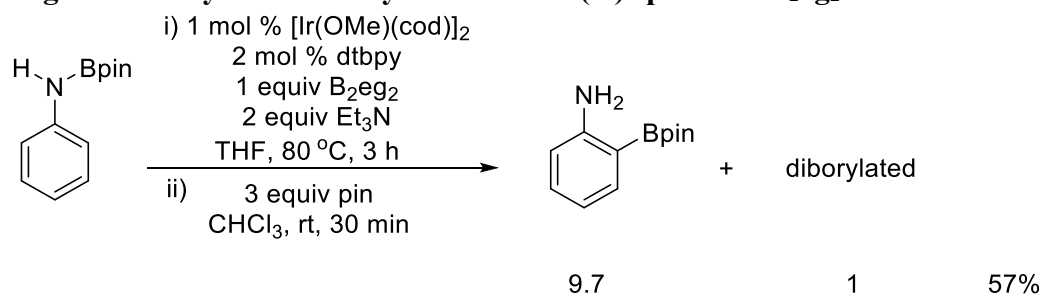

In a nitrogen filled glove box, a 3.0 mL conical vial was charged with aniline-*N*-Bpin (110 mg, 0.5 mmol, 1.0 equiv), [Ir(cod)(OMe)]<sub>2</sub> (3.3 mg, 1 mol %), dtbpy (2.68 mg, 2.0 mol %), B<sub>2</sub>eg<sub>2</sub> (70.8 mg, 0.5 mmol, 1.0 equiv), Et<sub>3</sub>N (101.1 mg, 1 mmol, 2 equiv) and dry THF (1.5 ml). The vial was capped with a teflon pressure cap and was taken out of the glove box and placed into a preheated aluminum block at 80 °C and heated for 3 h after which the volatiles were removed under reduced pressure. Pinacol (177 mg, 1.5 mmol, 3 equiv) and CHCl<sub>3</sub> (5.0 mL) were added to the reaction vial and stirred at room temperature for 30 min. After which <sup>1</sup>H NMR showed 57% conversion to the ortho-borylated product with a 9.7:1 ratio of mono:diborylation.

### Aniline *N*-Beg formation

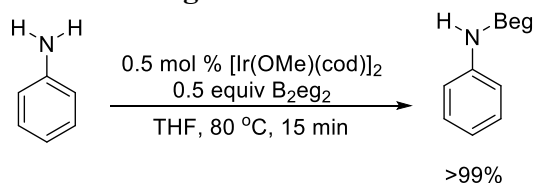

In a nitrogen filled glove box, a 3.0 mL conical vial was charged with [Ir(cod)(OMe)]<sub>2</sub> (3.3 mg, 0.5 mol %), B<sub>2</sub>eg<sub>2</sub> (70.9 mg, 0.5 equiv), aniline (93.0 mg, 1.0 mmol, 1.0 equiv), and dry THF (1.0 ml). The vial was capped with a teflon pressure cap, brought out of the glove box and placed into preheated aluminum block at 80 °C for 15 minutes. After bringing the vial back into the glove box solvent was removed and an aliquot of the black solid was dissolved in C<sub>6</sub>D<sub>6</sub>.

<sup>1</sup>H NMR (500 MHz, C<sub>6</sub>D<sub>6</sub>): δ 7.15 – 7.08 (m, 2H), 7.06 – 7.02 (m, 2H), 6.78 (ddd, *J* = 8.5, 6.6, 1.2 Hz, 1H), 4.44 (s, 1H), 3.53 (s, 4H).

<sup>11</sup>B NMR (160 MHz, C<sub>6</sub>D<sub>6</sub>): δ 24.86 (bs).

### Regioselectivity of C–H borylation of PhN(H)Beg with B<sub>2</sub>pin<sub>2</sub>

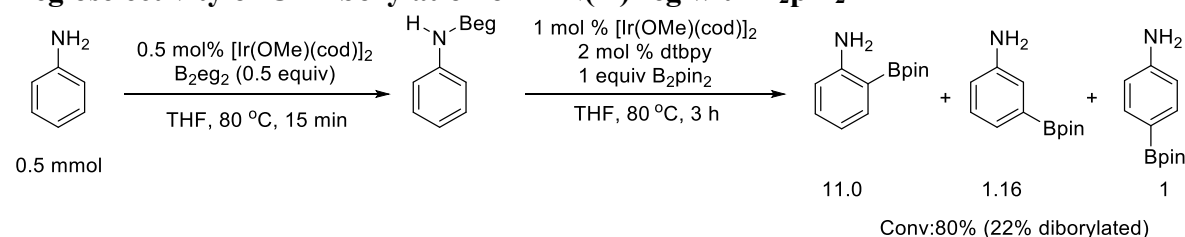

In a nitrogen filled glove box, a 3.0 mL conical vial was charged with [Ir(cod)(OMe)]<sub>2</sub> (1.65 mg, 0.5 mol %), B<sub>2</sub>eg<sub>2</sub> (35.75 mg, 0.5 equiv), aniline (46.5 mg, 0.5 mmol, 1.0 equiv), and dry THF (0.5 ml). The vial was capped with a teflon pressure cap, brought out of the glove box and placed into a preheated aluminum block at 80 °C for 15 minutes then the vial was taken to the glove box and volatiles were removed under reduced pressure and vial was charged with [Ir(cod)(OMe)]<sub>2</sub> (3.3 mg, 1.0 mol %), dtbpy (2.68 mg, 2.0 mol %), B<sub>2</sub>pin<sub>2</sub> (127.0 mg, 1.0 equiv), and dry THF (1.5 ml). The vial was capped with a teflon pressure cap and was taken out of the glove box and placed into a preheated aluminum block at 80 °C and heated for 3 h. The GC (the aliquot taken from reaction mixture was treated with methanol prior to injection in to GC) showed 80% conversion (58% mono-borylated aniline o:m:p (11.0:1.16:1) and 22% of diborylated products).

## **Computational procedures and results**

### **General**

Calculations of structures, energies, and frequencies employed default procedures in Gaussian09<sup>8,9,10</sup> with the following exceptions and all calculations were performed at the Department of Chemistry, Michigan State University. For transition state optimizations, (i) the maximum step size was set to 0.01 Bohr (MaxStep=1), (ii) the 2-electron integral accuracy was set to  $10^{-12}$  (acc2e=12), and (iii) superfine (PhN(H)Beg) or ultrafine (PhN(Me)Beg) grids were used for integration. DFT calculations were performed using the M06 functional with a split 6-31G\*/SDD basis set for the light and Ir atoms. An SDD core potential was used for Ir. Complete structures and energetics are provided in sections below. All absolute energies are in Hartrees. All relative energies are presented in kcal/mol. The default self-consistent reaction field (SCRF) and parameters for THF were used for all calculations.

### **Guide to structures, structure titles and their organization**

The sections below are divided into reactants and transition structures, then divided into specific structures. The first line after the title for a structure is a file name for the original calculation file, so that this file can always be located even if the file title changes.

# Calculated Structures, Energies, and Selected NPA Charges

## Reactants:

### PhN(H)Beg

PhN(H)Beg\_superfine\_grid

E(RM06) = -579.973272280

| Item                 | Value    | Threshold | Converged? |
|----------------------|----------|-----------|------------|
| Maximum Force        | 0.000035 | 0.000450  | YES        |
| RMS Force            | 0.000010 | 0.000300  | YES        |
| Maximum Displacement | 0.000627 | 0.001800  | YES        |
| RMS Displacement     | 0.000216 | 0.001200  | YES        |

Zero-point correction = 0.206810 (Hartree/Particle)

Thermal correction to Energy = 0.222466

Thermal correction to Enthalpy = 0.223585

Thermal correction to Gibbs Free Energy = 0.158549

Sum of electronic and zero-point Energies = -579.766462

Sum of electronic and thermal Energies = -579.750806

Sum of electronic and thermal Enthalpies = -579.749688

Sum of electronic and thermal Free Energies = -579.814723

|       | E (Thermal)<br>KCal/Mol | CV<br>Cal/Mol-Kelvin | S<br>Cal/Mol-Kelvin |
|-------|-------------------------|----------------------|---------------------|
| Total | 139.600                 | 51.547               | 115.561             |

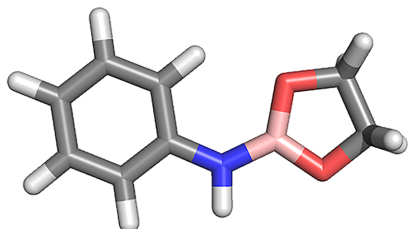

C,-3.483286,-0.775444,-0.003278  
 C,-3.696065,0.599968,0.008356  
 C,-2.593915,1.450565,0.013842  
 C,-1.298053,0.948532,0.008065  
 C,-1.08329,-0.435629,-0.003604  
 C,-2.193232,-1.289649,-0.009255  
 B,1.480243,-0.377108,-0.00584  
 O,2.621715,-1.142154,-0.065399  
 C,3.719889,-0.254488,0.11683  
 C,3.131497,1.142553,-0.10883  
 O,1.725131,0.972747,0.057677  
 H,-4.706597,1.003553,0.013276  
 H,-0.44578,1.623315,0.012648  
 H,3.49943,1.883592,0.609132  
 H,3.326915,1.515251,-1.123599  
 H,4.516817,-0.500909,-0.593582  
 H,4.114578,-0.375744,1.135246  
 N,0.19934,-0.989126,-0.010122  
 H,-2.740862,2.529879,0.022964  
 H,-2.035077,-2.368945,-0.018555  
 H,0.207509,-2.002847,-0.020572  
 H,-4.329564,-1.460917,-0.007888

### PhN(Me)Beg

MeOPhOBpinprimeM06SB

E(RM06) = -540.7031200

| Item                 | Value    | Threshold | Converged? |
|----------------------|----------|-----------|------------|
| Maximum Force        | 0.000047 | 0.000450  | YES        |
| RMS Force            | 0.000008 | 0.000300  | YES        |
| Maximum Displacement | 0.002886 | 0.001800  | NO         |
| RMS Displacement     | 0.000699 | 0.001200  | YES        |

Zero-point correction = 0.178465 (Hartree/Particle)

Thermal correction to Energy = 0.192327

Thermal correction to Enthalpy = 0.193445

Thermal correction to Gibbs Free Energy = 0.132344

Sum of electronic and zero-point Energies = -540.524655

Sum of electronic and thermal Energies = -540.510794

Sum of electronic and thermal Enthalpies = -540.509675

Sum of electronic and thermal Free Energies = -540.570776

|       | E (Thermal)<br>KCal/Mol | CV<br>Cal/Mol-Kelvin | S<br>Cal/Mol-Kelvin |
|-------|-------------------------|----------------------|---------------------|
| Total | 120.687                 | 45.867               | 108.570             |

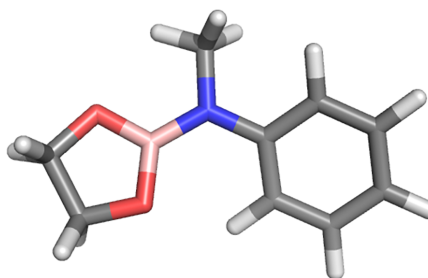

C,-3.46457,-0.67753,0.278879  
 C,-3.626669,0.676532,0.016203  
 C,-2.500686,1.434807,-0.29594  
 C,-1.240002,0.857372,-0.345606  
 C,-1.066057,-0.508477,-0.070315  
 C,-2.204525,-1.267112,0.23692  
 B,1.452855,-0.425579,-0.015991  
 O,2.651473,-1.096137,-0.125878  
 C,3.681122,-0.171589,0.204081  
 C,3.005311,1.200395,0.129559  
 O,1.611635,0.919601,0.222329  
 H,-4.613169,1.134739,0.048959  
 H,-0.377667,1.465489,-0.600664  
 H,3.30026,1.869238,0.945552  
 H,3.20439,1.708409,-0.824068  
 H,4.513235,-0.277377,-0.50085  
 H,4.052783,-0.394221,1.213973  
 N,0.206758,-1.110982,-0.128334  
 H,-2.602686,2.496697,-0.516336  
 H,-2.11666,-2.328101,0.455686  
 H,-4.327568,-1.295254,0.523809  
 C,0.248152,-2.565277,-0.208955  
 H,-0.055222,-3.040687,0.735103  
 H,-0.417097,-2.926885,-1.004126  
 H,1.266754,-2.885282,-0.436185

### (4,4'-dimethyl-2,2'-bipyridine)Ir(Beg)<sub>3</sub>

4,4'-Me<sub>2</sub>-bipyridine\_Ir\_(Beg)<sub>3</sub>\_superfine\_grid  
E(RM06) = -659.807029462

Zero-point correction = 0.426357  
(Hartree/Particle)  
Thermal correction to Energy = 0.466553  
Thermal correction to Enthalpy = 0.467671  
Thermal correction to Gibbs Free Energy = 0.343220  
Sum of electronic and zero-point Energies = -1439.201607  
Sum of electronic and thermal Energies = -1439.161411  
Sum of electronic and thermal Enthalpies = -1439.160293  
Sum of electronic and thermal Free Energies = -1439.284744

|       | E (Thermal)<br>KCal/Mol | CV<br>Cal/Mol-Kelvin | S<br>Cal/Mol-Kelvin |
|-------|-------------------------|----------------------|---------------------|
| Total | 292.766                 | 125.248              | 221.136             |

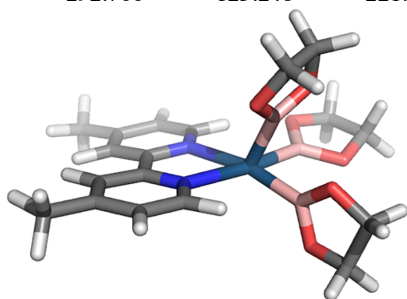

C,-3.916953,1.421993,-0.117558  
C,-2.711242,0.724928,-0.101524  
N,-1.528843,1.374512,-0.07018  
C,-1.529066,2.714237,-0.041438  
C,-2.693942,3.464353,-0.045913  
C,-3.927697,2.814985,-0.093126  
C,-2.647857,-0.755708,-0.111396  
N,-1.418778,-1.297853,-0.218154  
C,-1.3024,-2.631257,-0.214439  
C,-2.388861,-3.483085,-0.114942  
C,-3.671917,-2.943824,-0.007427  
C,-3.783755,-1.555828,-0.001458  
Ir,0.376829,0.110811,-0.307007  
B,1.841447,1.517676,-0.288722  
O,3.182763,1.378074,-0.662476  
C,3.894652,2.524468,-0.228329  
C,2.815911,3.585306,-0.03976  
O,1.625681,2.835,0.152463  
B,1.208185,-0.412052,1.410607  
O,2.223293,0.248167,2.104654  
C,2.387958,-0.387804,3.363128  
C,1.699598,-1.738253,3.18998  
O,0.772254,-1.524649,2.137131  
B,1.877122,-1.061094,-0.962767  
O,2.120262,-1.186331,-2.339379  
C,3.115088,-2.180235,-2.535874  
C,3.759867,-2.33792,-1.162973  
O,2.766291,-1.881363,-0.258201  
H,-0.285993,-3.015174,-0.283899  
H,-4.769809,-1.108202,0.101441  
H,-2.237051,-4.560939,-0.116854  
C,-4.874452,-3.826335,0.091934  
H,-4.864661,0.889691,-0.158802

C,-5.207442,3.586574,-0.131928  
H,-2.639501,4.551223,-0.017142  
H,-0.543057,3.177634,-0.004941  
H,2.640506,-3.114909,-2.875033  
H,3.823737,-1.858292,-3.308991  
H,4.037141,-3.373492,-0.930202  
H,4.658633,-1.7089,-1.062231  
H,1.177266,-2.077797,4.092822  
H,2.415814,-2.518928,2.888022  
H,1.908338,0.220419,4.146027  
H,3.454362,-0.476493,3.603857  
H,2.707558,4.224023,-0.930777  
H,2.996849,4.234797,0.82562  
H,4.653305,2.805518,-0.96933  
H,4.406796,2.295121,0.719957  
H,-6.07549,2.943955,0.051508  
H,-5.206061,4.391136,0.613579  
H,-5.341862,4.060532,-1.113587  
H,-5.779245,-3.255473,0.327507  
H,-5.045526,-4.354373,-0.855743  
H,-4.737592,-4.593529,0.864191

### Transition structures:

#### TS1

PhN(H)Beg\_left\_anti\_4,4'-dimethylbipyridine\_Ir(Beg)<sub>3</sub>\_superfine\_grid  
E(RM06) = -1980.29036773

| Item                 | Value    | Threshold | Converged? |
|----------------------|----------|-----------|------------|
| Maximum Force        | 0.000010 | 0.000450  | YES        |
| RMS Force            | 0.000003 | 0.000300  | YES        |
| Maximum Displacement | 0.015452 | 0.001800  | NO         |
| RMS Displacement     | 0.002176 | 0.001200  | NO         |

Zero-point correction = 0.600770 (Hartree/Particle)  
Thermal correction to Energy = 0.656449  
Thermal correction to Enthalpy = 0.657567  
Thermal correction to Gibbs Free Energy = 0.499537  
Sum of electronic and zero-point Energies = -1979.689598  
Sum of electronic and thermal Energies = -1979.633919  
Sum of electronic and thermal Enthalpies = -1979.632801  
Sum of electronic and thermal Free Energies = -1979.790830

|       | E (Thermal)<br>KCal/Mol | CV<br>Cal/Mol-Kelvin | S<br>Cal/Mol-Kelvin |
|-------|-------------------------|----------------------|---------------------|
| Total | 411.928                 | 176.449              | 280.802             |

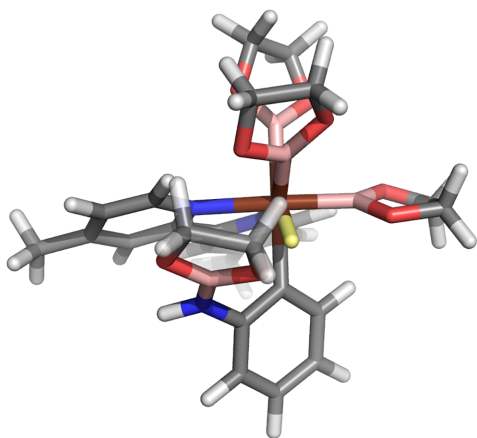

C,-4.117407,0.388126,-0.733646  
 C,-2.724633,0.376213,-0.66984  
 N,-2.05852,-0.726826,-0.27129  
 C,-2.75437,-1.825669,0.049393  
 C,-4.137176,-1.873754,0.004914  
 C,-4.852497,-0.741289,-0.386524  
 C,-1.900778,1.537215,-1.074707  
 N,-0.568704,1.349474,-1.065205  
 C,0.22414,2.332466,-1.50075  
 C,-0.264694,3.554232,-1.936694  
 C,-1.639559,3.789568,-1.913364  
 C,-2.458372,2.75157,-1.474256  
 Ir,0.167856,-0.559577,0.025916  
 B,0.578367,-2.298693,0.983977  
 O,1.582906,-2.476199,1.935326  
 C,1.562276,-3.824441,2.377133  
 C,0.181534,-4.327742,1.970488  
 O,-0.212104,-3.450729,0.923106  
 C,-0.386794,0.385637,1.972138  
 C,-1.119969,-0.434334,2.845988  
 C,-1.896833,0.07705,3.882259  
 C,-1.935237,1.451552,4.097871  
 C,-1.158418,2.281711,3.301592  
 C,-0.371948,1.764053,2.264744  
 B,1.838667,2.606731,1.382896  
 O,2.644144,1.690739,2.01736  
 C,3.97748,1.922624,1.590577  
 C,3.906884,3.164884,0.679848  
 O,2.531846,3.511202,0.609539  
 B,0.413452,-1.509675,-1.855348  
 O,0.061046,-2.815843,-2.158954  
 C,0.240764,-3.022576,-3.556438  
 C,1.132657,-1.866027,-3.989625  
 O,0.919728,-0.874564,-2.992049  
 B,2.142954,-0.562997,-0.561238  
 O,2.817641,0.600735,-0.944415  
 C,3.990189,0.209756,-1.646336  
 C,4.253007,-1.208511,-1.157233  
 O,2.974808,-1.66711,-0.738876  
 H,1.078667,0.023777,1.258146  
 H,1.2924,2.122095,-1.470472  
 H,-3.535267,2.904774,-1.449952  
 H,0.426365,4.325616,-2.272956  
 C,-2.214422,5.092711,-2.369881  
 H,-4.646583,1.279241,-1.063528  
 C,-6.346919,-0.747727,-0.429657

H,-4.655472,-2.792312,0.274865  
 H,-2.156176,-2.684862,0.351921  
 H,3.7882,0.237265,-2.728433  
 H,4.811761,0.905014,-1.427624  
 H,4.651365,-1.86862,-1.936924  
 H,4.945505,-1.228078,-0.301051  
 H,-1.12483,-1.514887,2.685978  
 H,-2.540653,1.872785,4.899381  
 H,-1.129652,3.356392,3.488558  
 H,0.882161,-1.466607,-4.97922  
 H,2.197954,-2.148728,-3.987835  
 H,-0.739546,-2.997365,-4.055668  
 H,0.691276,-4.006176,-3.732443  
 H,-0.542117,-4.251013,2.797983  
 H,0.184211,-5.363924,1.611991  
 H,1.735721,-3.868983,3.459034  
 H,2.366371,-4.385301,1.876339  
 H,4.47528,4.013083,1.08465  
 H,4.278001,2.956563,-0.332595  
 H,4.339429,1.036525,1.052609  
 H,4.615708,2.080564,2.469458  
 N,0.434235,2.668725,1.531779  
 H,-0.03317,3.507337,1.207078  
 H,-2.47379,-0.597888,4.514  
 H,-6.744739,0.166689,-0.883138  
 H,-6.720816,-1.60777,-0.999289  
 H,-6.76257,-0.831103,0.58333  
 H,-3.214053,5.262342,-1.953841  
 H,-1.570644,5.933634,-2.085985  
 H,-2.305043,5.111275,-3.464613

## TS2

PhN(H)Beg\_H...O-B\_TS\_front\_4,4'-  
 dimethylbipyridine\_Ir(Beg)3\_superfine\_grid  
 E(RM06) = -1980.29476162

| Item                 | Value    | Threshold | Converged? |
|----------------------|----------|-----------|------------|
| Maximum Force        | 0.000004 | 0.000450  | YES        |
| RMS Force            | 0.000002 | 0.000300  | YES        |
| Maximum Displacement | 0.003496 | 0.001800  | NO         |
| RMS Displacement     | 0.000651 | 0.001200  | YES        |

Zero-point correction = 0.601453  
 Thermal correction to Energy = 0.656979  
 Thermal correction to Enthalpy = .658098  
 Thermal correction to Gibbs Free Energy = 0.500930  
 Sum of electronic and zero-point Energies = -1979.693309  
 Sum of electronic and thermal Energies = -1979.637782  
 Sum of electronic and thermal Enthalpies = -1979.636664  
 Sum of electronic and thermal Free Energies = -1979.793832

|       | E (Thermal)<br>KCal/Mol | CV<br>Cal/Mol-Kelvin | S<br>Cal/Mol-Kelvin |
|-------|-------------------------|----------------------|---------------------|
| Total | 412.261                 | 176.182              | 279.270             |

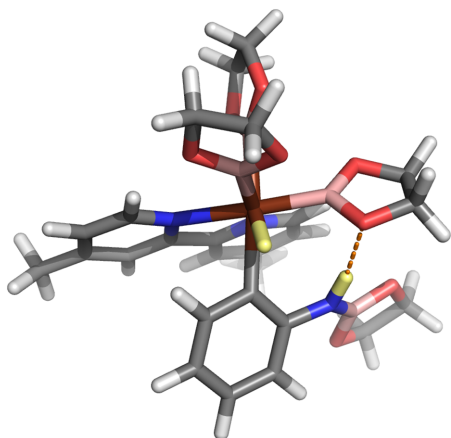

C,2.120282,2.287515,1.81476  
 C,1.005112,1.758526,1.169163  
 N,0.843423,0.42474,1.047222  
 C,1.747738,-0.390761,1.598788  
 C,2.871951,0.075002,2.261167  
 C,3.089388,1.448203,2.360342  
 C,-0.079748,2.608886,0.630271  
 N,-1.154868,1.964389,0.137644  
 C,-2.189817,2.683664,-0.30637  
 C,-2.195181,4.069936,-0.310879  
 C,-1.079548,4.759997,0.161837  
 C,-0.014595,4.000649,0.64135  
 Ir,-0.840499,-0.306323,-0.224634  
 B,-0.354568,-2.268219,-0.227309  
 O,-0.008135,-2.990858,0.916852  
 C,0.678003,-4.172219,0.50958  
 C,0.250198,-4.362767,-0.938793  
 O,-0.104666,-3.049134,-1.362618  
 C,0.381377,0.433265,-1.958022  
 C,-0.087299,1.526666,-2.697745  
 C,0.738369,2.28871,-3.521358  
 C,2.080795,1.943733,-3.641668  
 C,2.562926,0.824016,-2.975668  
 C,1.726475,0.056751,-2.155033  
 B,3.486845,-1.248293,-0.874333  
 O,4.488886,-0.303558,-0.823623  
 C,5.481466,-0.798823,0.064353  
 C,5.146248,-2.285494,0.242281  
 O,3.793778,-2.403876,-0.179304  
 B,-1.86416,-0.770847,1.572141  
 O,-1.551705,-0.125777,2.765068  
 C,-2.316854,-0.70872,3.815311  
 C,-3.411794,-1.491913,3.096387  
 O,-2.912742,-1.66262,1.775399  
 B,-2.743471,-0.86168,-0.787723  
 O,-3.813192,0.031383,-0.747207  
 C,-5.010424,-0.711221,-0.942562  
 C,-4.543281,-2.022526,-1.572622  
 O,-3.160888,-2.09788,-1.254008  
 H,-0.993968,-0.60181,-1.816058  
 H,-3.035922,2.105207,-0.676786  
 H,0.868916,4.513027,1.015806  
 H,-3.061398,4.608666,-0.691079  
 C,-1.038484,6.254591,0.181101  
 H,2.243844,3.363841,1.911339  
 C,4.310458,2.00632,3.017677

H,3.571157,-0.635494,2.700858  
 H,1.545359,-1.457073,1.506686  
 H,-5.491077,-0.875317,0.03392  
 H,-5.702369,-0.146882,-1.578816  
 H,-5.067433,-2.898159,-1.171304  
 H,-4.662857,-2.022592,-2.666268  
 H,-1.139479,1.808235,-2.610227  
 H,2.748585,2.52558,-4.276034  
 H,3.601841,0.51767,-3.092918  
 H,-4.359627,-0.934215,3.053339  
 H,-3.610342,-2.470466,3.549054  
 H,-2.709099,0.07813,4.470376  
 H,-1.666673,-1.362911,4.414406  
 H,-0.627359,-5.019428,-1.029769  
 H,1.049024,-4.756134,-1.578275  
 H,0.404262,-5.00952,1.161167  
 H,1.763106,-3.996823,0.591202  
 H,5.779684,-2.928408,-0.385671  
 H,5.242446,-2.62136,1.2821  
 H,5.41976,-0.248176,1.016173  
 H,6.47782,-0.633587,-0.36194  
 N,2.25375,-1.097324,-1.539797  
 H,1.577523,-1.852039,-1.45088  
 H,0.3335,3.141659,-4.065444  
 H,-0.009204,6.630678,0.190639  
 H,-1.557644,6.678801,-0.68632  
 H,-1.539469,6.641447,1.079096  
 H,4.077426,2.904282,3.602213  
 H,4.783074,1.27152,3.679463  
 H,5.052391,2.297702,2.261058

### TS3

PhN(H)Beg\_H...O-B\_TS\_rear\_4,4'-  
 dimethylbipyridine\_Ir(Beg)<sub>3</sub>\_superfine\_grid  
 E(RM06) = -1980.29368534

| Item                 | Value    | Threshold | Converged? |
|----------------------|----------|-----------|------------|
| Maximum Force        | 0.000002 | 0.000450  | YES        |
| RMS Force            | 0.000001 | 0.000300  | YES        |
| Maximum Displacement | 0.007538 | 0.001800  | NO         |
| RMS Displacement     | 0.000925 | 0.001200  | YES        |

Zero-point correction = 0.601689  
 (Hartree/Particle)  
 Thermal correction to Energy = 0.657309  
 Thermal correction to Enthalpy = 0.658428  
 Thermal correction to Gibbs Free Energy = 0.498707  
 Sum of electronic and zero-point Energies = -1979.691997  
 Sum of electronic and thermal Energies = -1979.636376  
 Sum of electronic and thermal Enthalpies = -1979.635258  
 Sum of electronic and thermal Free Energies = -1979.794978

|       | E (Thermal)<br>KCal/Mol | CV<br>Cal/Mol-Kelvin | S<br>Cal/Mol-Kelvin |
|-------|-------------------------|----------------------|---------------------|
| Total | 412.468                 | 175.978              | 283.806             |

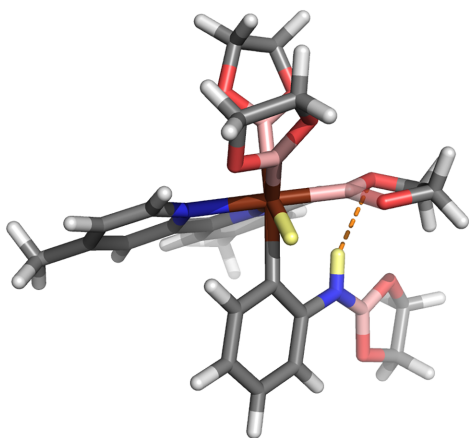

C,1.074012,3.008629,2.02546  
 C,0.290603,2.147028,1.259553  
 N,0.526668,0.817728,1.248695  
 C,1.512301,0.331483,2.015692  
 C,2.325784,1.137916,2.79313  
 C,2.121578,2.517605,2.799766  
 C,-0.864955,2.621415,0.467254  
 N,-1.601948,1.671797,-0.137534  
 C,-2.695435,2.038674,-0.814024  
 C,-3.093297,3.359912,-0.939356  
 C,-2.330134,4.365059,-0.34485  
 C,-1.202056,3.970999,0.369175  
 Ir,-0.678227,-0.447734,-0.17803  
 B,0.265161,-2.243706,-0.048929  
 O,1.138529,-2.598184,0.984924  
 C,1.897031,-3.730615,0.567939  
 C,1.087256,-4.310275,-0.585954  
 O,0.308476,-3.214531,-1.047273  
 C,0.546667,0.373273,-1.881109  
 C,-0.072105,1.156614,-2.863924  
 C,0.641592,1.882377,-3.81466  
 C,2.030767,1.816224,-3.80496  
 C,2.683713,1.035801,-2.859657  
 C,1.960227,0.310377,-1.90199  
 B,4.008411,-0.552004,-0.597591  
 O,5.062448,0.082706,-1.213055  
 C,6.253383,-0.421321,-0.615435  
 C,5.781529,-1.092297,0.678031  
 O,4.396981,-1.339933,0.468487  
 B,-1.882513,-1.010414,1.474209  
 O,-1.511311,-1.817681,2.536625  
 C,-2.577174,-1.840119,3.482154  
 C,-3.776199,-1.316725,2.701111  
 O,-3.195604,-0.5652,1.641477  
 B,-2.333053,-1.508872,-0.802393  
 O,-3.302941,-0.934685,-1.622814  
 C,-4.454498,-1.770847,-1.587669  
 C,-3.914194,-3.121475,-1.132819  
 O,-2.71012,-2.798929,-0.447215  
 H,-0.542884,-0.849288,-1.753334  
 H,-3.253561,1.223411,-1.273878  
 H,-0.588598,4.73355,0.84373  
 H,-3.990192,3.605371,-1.505693  
 C,-2.722574,5.803721,-0.454756  
 H,0.870943,4.077009,2.033539  
 C,2.994884,3.43128,3.597883

H,3.115284,0.687386,3.392285  
 H,1.641242,-0.750076,1.988047  
 H,-5.175798,-1.356506,-0.866013  
 H,-4.926475,-1.799479,-2.576316  
 H,-4.595544,-3.653595,-0.458466  
 H,-3.681731,-3.781144,-1.981846  
 H,-1.163956,1.189043,-2.890329  
 H,2.615953,2.368,-4.540098  
 H,3.770752,0.983147,-2.851492  
 H,-4.442423,-0.68086,3.295361  
 H,-4.37093,-2.137454,2.268246  
 H,-2.320994,-1.189468,4.331636  
 H,-2.718016,-2.859533,3.859251  
 H,0.417813,-5.118488,-0.254564  
 H,1.71235,-4.693421,-1.40103  
 H,2.018971,-4.425585,1.406732  
 H,2.8934,-3.38823,0.248256  
 H,6.301931,-2.034164,0.885431  
 H,5.901139,-0.432202,1.549663  
 H,6.955477,0.401615,-0.440719  
 H,6.723206,-1.13752,-1.304205  
 N,2.640998,-0.458164,-0.948718  
 H,2.010782,-0.924775,-0.303188  
 H,0.116568,2.47973,-4.559149  
 H,3.915825,3.660807,3.04459  
 H,2.49545,4.382221,3.8146  
 H,3.29438,2.969188,4.545867  
 H,-3.602157,6.013145,0.16884  
 H,-1.915895,6.470221,-0.13025  
 H,-2.992778,6.062126,-1.485938

## TS4

PhN(H)Beg\_H...O-B\_TS\_left\_4,4'-dimethylbipyridine\_  
 Ir(Beg)3\_superfine\_grid  
 E(RM06) = -1980.29519479

| Item                 | Value    | Threshold | Converged? |
|----------------------|----------|-----------|------------|
| Maximum Force        | 0.000003 | 0.000450  | YES        |
| RMS Force            | 0.000001 | 0.000300  | YES        |
| Maximum Displacement | 0.003225 | 0.001800  | NO         |
| RMS Displacement     | 0.000385 | 0.001200  | YES        |

Zero-point correction = 0.601723 (Hartree/Particle)  
 Thermal correction to Energy = 0.657028  
 Thermal correction to Enthalpy = 0.658146  
 Thermal correction to Gibbs Free Energy = 0.501778  
 Sum of electronic and zero-point Energies = -1979.693472  
 Sum of electronic and thermal Energies = -1979.638167  
 Sum of electronic and thermal Enthalpies = -1979.637049  
 Sum of electronic and thermal Free Energies = -1979.793417

|       | E (Thermal)<br>KCal/Mol | CV<br>Cal/Mol-Kelvin | S<br>Cal/Mol-Kelvin |
|-------|-------------------------|----------------------|---------------------|
| Total | 412.291                 | 176.033              | 277.850             |

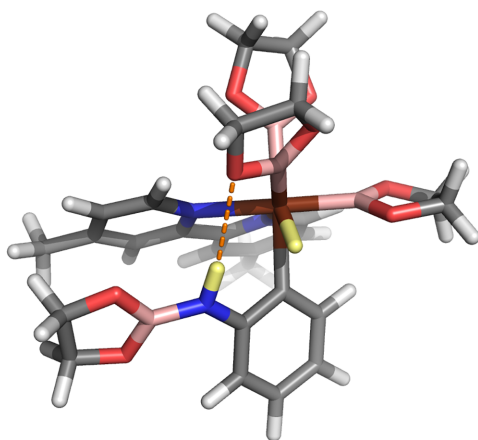

C,0.822272,3.506792,-1.614067  
 C,0.52764,2.194915,-1.250156  
 N,-0.67837,1.869756,-0.737962  
 C,-1.606477,2.826492,-0.611223  
 C,-1.374461,4.145971,-0.963014  
 C,-0.126937,4.514771,-1.464991  
 C,1.477463,1.080379,-1.461397  
 N,1.020555,-0.149545,-1.155809  
 C,1.772886,-1.207305,-1.462604  
 C,3.030477,-1.09669,-2.037119  
 C,3.562587,0.168186,-2.277084  
 C,2.750252,1.266366,-1.995572  
 Ir,-0.907087,-0.18232,0.158108  
 B,-2.647821,0.034211,1.177242  
 O,-2.986452,-0.643706,2.34746  
 C,-4.283216,-0.230757,2.754037  
 C,-4.508284,1.077789,2.004254  
 O,-3.614705,1.002256,0.900294  
 C,0.276903,0.673572,1.841672  
 C,-0.257762,1.793192,2.491014  
 C,0.507255,2.60873,3.322267  
 C,1.842881,2.285868,3.543887  
 C,2.388601,1.148144,2.963845  
 C,1.615253,0.331121,2.127445  
 B,3.510866,-1.174153,1.313632  
 O,4.593221,-0.340243,1.491889  
 C,5.755061,-1.117543,1.221993  
 C,5.231317,-2.326457,0.4445  
 O,3.8567,-2.40658,0.794377  
 B,-1.989532,-0.820858,-1.553822  
 O,-3.270063,-0.438249,-1.918725  
 C,-3.573968,-1.017474,-3.184475  
 C,-2.52957,-2.114542,-3.350164  
 O,-1.466329,-1.710605,-2.495488  
 B,-1.214579,-2.217369,0.211243  
 O,-0.131524,-3.099207,0.197215  
 C,-0.635858,-4.398658,-0.095463  
 C,-2.108554,-4.314051,0.288452  
 O,-2.408936,-2.924843,0.207972  
 H,-0.531811,-0.793206,1.623178  
 H,1.348439,-2.177192,-1.205323  
 H,3.126225,2.265765,-2.203927  
 H,3.598095,-1.996167,-2.270859  
 C,4.951381,0.350148,-2.80087  
 H,1.79649,3.758481,-2.027106  
 C,0.180676,5.933844,-1.820549

H,-2.165737,4.883795,-0.842863  
 H,-2.561652,2.500076,-0.201547  
 H,-0.50608,-4.596895,-1.170992  
 H,-0.078294,-5.153337,0.470145  
 H,-2.763133,-4.876076,-0.387915  
 H,-2.288264,-4.663808,1.315554  
 H,-1.305819,2.054599,2.32217  
 H,2.460366,2.906579,4.192414  
 H,3.422022,0.871435,3.16429  
 H,-2.167851,-2.222379,-4.379252  
 H,-2.906709,-3.092246,-3.008715  
 H,-3.490876,-0.246402,-3.964873  
 H,-4.602501,-1.39621,-3.182603  
 H,-4.247793,1.953015,2.620347  
 H,-5.536786,1.202625,1.646028  
 H,-4.315636,-0.114104,3.843718  
 H,-5.016841,-0.999388,2.467549  
 H,5.320367,-2.175857,-0.643922  
 H,5.739535,-3.261644,0.705231  
 H,6.221228,-1.410763,2.173644  
 H,6.477173,-0.520251,0.653542  
 N,2.164148,-0.850685,1.601638  
 H,1.467904,-1.494966,1.234468  
 H,0.062166,3.48489,3.792734  
 H,-0.684509,6.425392,-2.281071  
 H,0.436015,6.507945,-0.919438  
 H,1.030229,6.00466,-2.508942  
 H,5.31921,-0.558758,-3.290855  
 H,5.008542,1.179982,-3.515464  
 H,5.640812,0.58581,-1.977812

### TS<sub>meta</sub>

PhN(H)Beg\_left\_meta\_4,4'-Me2-bipyridine\_Ir\_(Beg)3\_  
 superfine\_grid  
 E(RM06) = -1980.29107739

| Item                 | Value    | Threshold | Converged? |
|----------------------|----------|-----------|------------|
| Maximum Force        | 0.000010 | 0.000450  | YES        |
| RMS Force            | 0.000003 | 0.000300  | YES        |
| Maximum Displacement | 0.061559 | 0.001800  | NO         |
| RMS Displacement     | 0.011491 | 0.001200  | NO         |

Zero-point correction = 0.601119 (Hartree/Particle)  
 Thermal correction to Energy = 0.657013  
 Thermal correction to Enthalpy = 0.658131  
 Thermal correction to Gibbs Free Energy = 0.496329  
 Sum of electronic and zero-point Energies = -1979.689958  
 Sum of electronic and thermal Energies = -1979.634065  
 Sum of electronic and thermal Enthalpies = -1979.632946  
 Sum of electronic and thermal Free Energies = -1979.794748

|       | E (Thermal)<br>KCal/Mol | CV<br>Cal/Mol-Kelvin | S<br>Cal/Mol-Kelvin |
|-------|-------------------------|----------------------|---------------------|
| Total | 412.282                 | 176.298              | 287.505             |

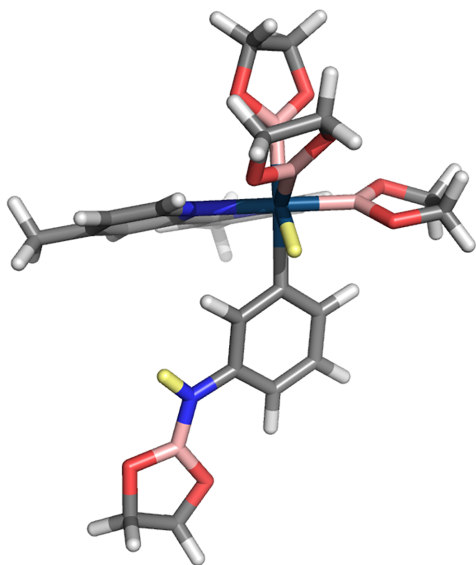

C,0.599247,2.867861,2.439927  
 C,0.175882,2.047881,1.395216  
 N,-0.609373,0.975851,1.630255  
 C,-0.983675,0.707654,2.888249  
 C,-0.591641,1.48417,3.965408  
 C,0.226047,2.594312,3.752548  
 C,0.529684,2.314423,-0.016553  
 N,-0.018723,1.494677,-0.93212  
 C,0.233633,1.709562,-2.227708  
 C,1.060805,2.729666,-2.670334  
 C,1.659726,3.579552,-1.739429  
 C,1.375961,3.35609,-0.394832  
 Ir,-1.120218,-0.352218,-0.10463  
 B,-2.057621,-1.889794,0.828633  
 O,-2.067593,-3.214063,0.389708  
 C,-2.834511,-3.992099,1.295588  
 C,-2.912445,-3.132499,2.55347  
 O,-2.657025,-1.813308,2.089765  
 C,0.869696,-1.277326,0.250662  
 C,1.062545,-2.108106,1.365519  
 C,2.347954,-2.458443,1.771727  
 C,3.471807,-2.024801,1.077061  
 C,3.303995,-1.221763,-0.056307  
 C,2.007012,-0.867564,-0.452498  
 B,5.783414,-0.975986,-0.671566  
 O,6.67697,-0.369932,-1.526832  
 C,7.959436,-0.909754,-1.231147  
 C,7.791727,-1.581949,0.13606  
 O,6.386089,-1.769026,0.275767  
 B,-2.956597,0.699994,-0.280218  
 O,-4.012358,0.666619,0.616024  
 C,-4.995179,1.608313,0.196425  
 C,-4.62544,1.91072,-1.250681  
 O,-3.246261,1.571595,-1.333089  
 B,-2.156811,-0.919877,-1.796988  
 O,-1.655217,-0.683077,-3.077922  
 C,-2.71869,-0.869074,-4.00449  
 C,-3.712772,-1.744343,-3.251197  
 O,-3.420961,-1.496103,-1.88141  
 H,-0.314504,-1.57667,-0.838242  
 H,-0.250854,1.017631,-2.917024  
 H,1.831249,4.002321,0.352437

H,1.243086,2.857854,-3.736028  
 C,2.550828,4.699882,-2.171696  
 H,1.222855,3.736468,2.241272  
 C,0.688205,3.446855,4.890362  
 H,-0.926437,1.224735,4.968241  
 H,-1.627342,-0.163551,3.007763  
 H,-3.150921,0.112134,-4.256379  
 H,-2.33951,-1.329996,-4.923773  
 H,-4.758361,-1.490124,-3.462012  
 H,-3.56653,-2.813629,-3.46511  
 H,0.206016,-2.474466,1.934332  
 H,4.470463,-2.31097,1.397533  
 H,-4.774414,2.960148,-1.530206  
 H,-5.189186,1.279052,-1.956261  
 H,-4.935668,2.502971,0.834166  
 H,-5.995991,1.174642,0.305079  
 H,-2.14271,-3.413241,3.290021  
 H,-3.890405,-3.174002,3.047567  
 H,-2.347844,-4.960211,1.465594  
 H,-3.829744,-4.179013,0.864059  
 H,8.300235,-2.550235,0.202618  
 H,8.150197,-0.944958,0.956759  
 H,8.706566,-0.107914,-1.223106  
 H,8.23554,-1.631246,-2.013204  
 N,4.389311,-0.760532,-0.811536  
 H,2.481422,-3.089132,2.651363  
 H,1.095322,4.402617,4.542298  
 H,-0.130859,3.651341,5.590533  
 H,1.476202,2.935122,5.459285  
 H,3.175097,5.062308,-1.347341  
 H,3.205596,4.39183,-2.995605  
 H,1.954495,5.548025,-2.534766  
 H,1.896439,-0.248919,-1.348275  
 H,4.118707,-0.178757,-1.596751

## TS5

PhN(H)Beg\_para\_4,4'-Me2-bipyridine\_Ir\_(Beg)3\_  
 superfine\_grid  
 E(RM06) = -1980.29037111

| Item                 | Value    | Threshold | Converged? |
|----------------------|----------|-----------|------------|
| Maximum Force        | 0.000003 | 0.000450  | YES        |
| RMS Force            | 0.000001 | 0.000300  | YES        |
| Maximum Displacement | 0.010812 | 0.001800  | NO         |
| RMS Displacement     | 0.001474 | 0.001200  | NO         |

Zero-point correction = 0.601098 (Hartree/Particle)  
 Thermal correction to Energy = 0.656941  
 Thermal correction to Enthalpy = 0.658060  
 Thermal correction to Gibbs Free Energy = 0.496976  
 Sum of electronic and zero-point Energies = -1979.689273  
 Sum of electronic and thermal Energies = -1979.633430  
 Sum of electronic and thermal Enthalpies = -1979.632311  
 Sum of electronic and thermal Free Energies = -1979.793395

|       | E (Thermal)<br>KCal/Mol | CV<br>Cal/Mol-Kelvin | S<br>Cal/Mol-Kelvin |
|-------|-------------------------|----------------------|---------------------|
| Total | 412.237                 | 176.297              | 286.228             |

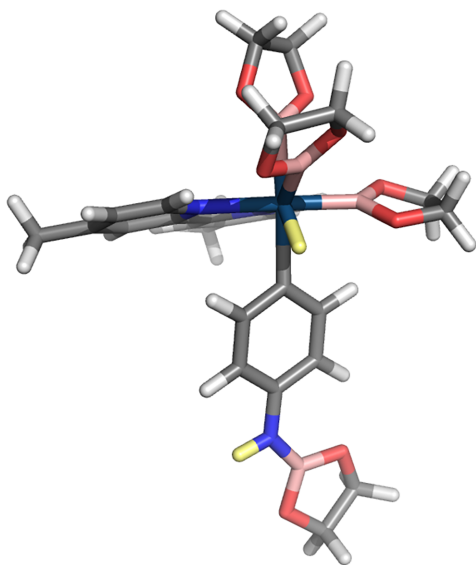

C,0.310189,2.976566,2.35232  
 C,-0.199857,2.148224,1.353734  
 N,-0.331497,0.820732,1.555415  
 C,0.034715,0.301762,2.734704  
 C,0.550898,1.074051,3.761369  
 C,0.702457,2.449182,3.579041  
 C,-0.647298,2.667252,0.042183  
 N,-1.195657,1.769732,-0.796538  
 C,-1.651267,2.185553,-1.983679  
 C,-1.56203,3.503761,-2.399545  
 C,-0.977521,4.450811,-1.556456  
 C,-0.522498,4.009417,-0.317641  
 Ir,-1.046706,-0.437648,-0.159874  
 B,-0.816852,-2.311393,0.578156  
 O,-0.520008,-3.444243,-0.181691  
 C,-0.45638,-4.5694,0.68057  
 C,-0.282186,-3.965133,2.070251  
 O,-0.775033,-2.638449,1.936556  
 C,1.066418,-0.401184,-0.831356  
 C,2.03659,-1.136161,-0.132835  
 C,3.402468,-0.937034,-0.310461  
 C,3.861567,0.006357,-1.236651  
 C,2.91261,0.727086,-1.96917  
 C,1.551416,0.520179,-1.770449  
 B,6.377424,-0.333797,-0.867578  
 O,7.637059,0.095405,-1.222753  
 C,8.562854,-0.775573,-0.584019  
 C,7.740604,-1.495126,0.490703  
 O,6.386633,-1.33161,0.077933  
 B,-2.993614,-0.301362,0.681379  
 O,-3.392144,-0.827887,1.899941  
 C,-4.723629,-0.397946,2.167022  
 C,-5.235197,0.085506,0.815635  
 O,-4.051562,0.393728,0.089348  
 B,-2.469722,-1.268346,-1.40081  
 O,-2.771929,-0.720268,-2.648463  
 C,-3.992666,-1.298392,-3.093897  
 C,-4.096032,-2.595474,-2.300733  
 O,-3.299277,-2.357967,-1.146938  
 H,-0.294176,-1.096534,-1.456382  
 H,-2.095809,1.410427,-2.608463

H,-0.062852,4.726326,0.35916  
 H,-1.941088,3.79188,-3.37872  
 C,-0.858667,5.882917,-1.970147  
 H,0.402269,4.047543,2.186599  
 C,1.271421,3.315168,4.656781  
 H,0.831265,0.604458,4.702658  
 H,-0.108583,-0.773944,2.83545  
 H,-4.821577,-0.612609,-2.858384  
 H,-3.962553,-1.450927,-4.178929  
 H,-5.122924,-2.837769,-2.001953  
 H,-3.685829,-3.4527,-2.855432  
 H,1.725076,-1.889045,0.595126  
 H,-5.87966,0.969712,0.882029  
 H,-5.783904,-0.7063,0.28011  
 H,-4.700927,0.410373,2.913277  
 H,-5.307674,-1.229445,2.578126  
 H,0.776958,-3.929708,2.371674  
 H,-0.842111,-4.497176,2.848498  
 H,0.375169,-5.221993,0.387877  
 H,-1.390647,-5.145732,0.598739  
 H,7.975743,-2.562578,0.567046  
 H,7.868632,-1.040047,1.482842  
 H,9.392837,-0.193648,-0.16731  
 H,8.970546,-1.475558,-1.327171  
 N,5.224113,0.240182,-1.459265  
 H,4.119415,-1.518031,0.265878  
 H,1.115833,4.379247,4.447605  
 H,0.821501,3.082539,5.629714  
 H,2.352382,3.147437,4.755525  
 H,-0.286501,6.469853,-1.243353  
 H,-0.367232,5.970083,-2.947412  
 H,-1.851125,6.341918,-2.070567  
 H,0.848947,1.100188,-2.373482  
 H,5.406421,0.941084,-2.168621  
 H,3.249893,1.455628,-2.709542

## TS6

PhN(Me)Beg\_anti\_meta\_4,4'-Me2-bipyridine\_Ir\_(Beg)3\_  
 ultrafine\_grid  
 E(RM06) = -2019.56206022

| Item                 | Value    | Threshold | Converged? |
|----------------------|----------|-----------|------------|
| Maximum Force        | 0.000010 | 0.000450  | YES        |
| RMS Force            | 0.000004 | 0.000300  | YES        |
| Maximum Displacement | 0.007165 | 0.001800  | NO         |
| RMS Displacement     | 0.001371 | 0.001200  | NO         |

Zero-point correction = 0.629879 (Hartree/Particle)  
 Thermal correction to Energy = 0.687155  
 Thermal correction to Enthalpy = 0.688274  
 Thermal correction to Gibbs Free Energy = 0.527023  
 Sum of electronic and zero-point Energies = -2018.932181  
 Sum of electronic and thermal Energies = -2018.874905  
 Sum of electronic and thermal Enthalpies = -2018.873787  
 Sum of electronic and thermal Free Energies = -2019.035037

|       | E (Thermal)<br>KCal/Mol | CV<br>Cal/Mol-Kelvin | S<br>Cal/Mol-Kelvin |
|-------|-------------------------|----------------------|---------------------|
| Total | 431.196                 | 181.762              | 286.524             |

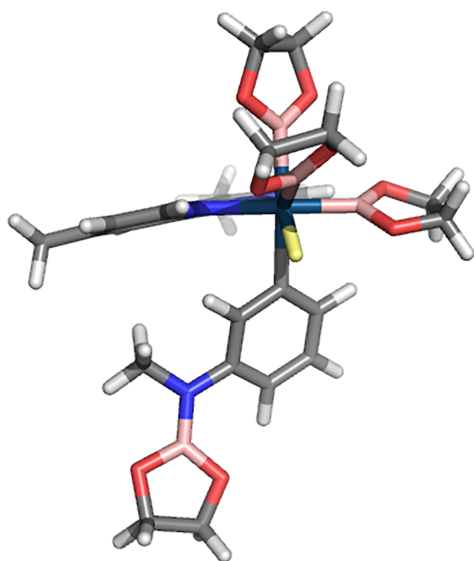

C,0.083109,3.447338,1.843978  
 C,-0.16724,2.374169,0.989868  
 N,-0.889004,1.312027,1.403478  
 C,-1.36416,1.297137,2.656259  
 C,-1.14282,2.330659,3.550271  
 C,-0.399937,3.441937,3.148918  
 C,0.31234,2.346697,-0.409736  
 N,-0.11651,1.318878,-1.164194  
 C,0.252202,1.259572,-2.448389  
 C,1.087098,2.1991,-3.032262  
 C,1.574554,3.255611,-2.261068  
 C,1.159735,3.323484,-0.933392  
 Ir,-1.166829,-0.393751,-0.03171  
 B,-2.053463,-1.785845,1.147142  
 O,-1.939091,-3.167215,0.984386  
 C,-2.710718,-3.811768,1.985953  
 C,-2.926372,-2.732795,3.042101  
 O,-2.738206,-1.513543,2.335628  
 C,0.851035,-1.054823,0.622795  
 C,1.032318,-1.586725,1.905347  
 C,2.314264,-1.708171,2.439674  
 C,3.437019,-1.329041,1.715455  
 C,3.289737,-0.832829,0.412683  
 C,1.995169,-0.713849,-0.11055  
 B,5.727548,-0.947092,-0.200425  
 O,6.777898,-0.474837,-0.959839  
 C,7.895343,-1.31302,-0.695249  
 C,7.518379,-2.064967,0.584662  
 O,6.102255,-1.948822,0.665867  
 B,-3.045637,0.459139,-0.537831  
 O,-4.144703,0.582089,0.296941  
 C,-5.153254,1.322146,-0.384684  
 C,-4.724168,1.272471,-1.845653  
 O,-3.324822,1.024916,-1.784944  
 B,-2.040084,-1.383583,-1.617283  
 O,-1.469817,-1.380128,-2.891118  
 C,-2.450678,-1.844155,-3.810918  
 C,-3.442636,-2.607828,-2.940431  
 O,-3.253056,-2.064612,-1.639996  
 H,-0.23284,-1.674598,-0.443294  
 H,-0.143551,0.410807,-3.007054  
 H,1.519591,4.139726,-0.310754

H,1.365291,2.102516,-4.080442  
 C,2.528822,4.254909,-2.832513  
 H,0.651581,4.307117,1.496685  
 C,-0.135364,4.575501,4.087041  
 H,-1.552531,2.270938,4.557102  
 H,-1.944117,0.41469,2.925537  
 H,-2.922263,-0.978187,-4.301074  
 H,-1.978585,-2.465364,-4.580818  
 H,-4.484604,-2.469559,-3.253259  
 H,-3.228457,-3.686687,-2.918045  
 H,0.171403,-1.887984,2.50557  
 H,4.427998,-1.422183,2.150441  
 H,-4.921092,2.202078,-2.392017  
 H,-5.207871,0.441493,-2.384737  
 H,-5.174139,2.350895,0.00514  
 H,-6.133882,0.866322,-0.205897  
 H,-2.183671,-2.799487,3.853191  
 H,-3.926739,-2.756808,3.490258  
 H,-2.173938,-4.688057,2.36917  
 H,-3.661749,-4.154284,1.549984  
 H,7.80048,-3.123532,0.559219  
 H,7.967277,-1.60899,1.478426  
 H,8.79859,-0.702421,-0.582816  
 H,8.04274,-1.994436,-1.545161  
 N,4.409879,-0.42919,-0.349686  
 H,2.443563,-2.096386,3.450548  
 H,0.355639,5.414538,3.582134  
 H,-1.067519,4.940011,4.536674  
 H,0.511846,4.251633,4.91284  
 H,2.591579,5.157384,-2.214454  
 H,3.53842,3.824967,-2.897273  
 H,2.23897,4.546733,-3.849066  
 H,1.868543,-0.344239,-1.126991  
 C,4.170039,0.508089,-1.438603  
 H,3.672902,0.035645,-2.299342  
 H,3.533928,1.337963,-1.096685  
 H,5.124101,0.915614,-1.781992

### TS<sub>para</sub>

PhN(Me)Beg\_para\_4,4'-Me2-bipyridine\_Ir\_(Beg)3\_  
 ultrafine\_grid  
 E(RM06) = -2019.55943016

| Item                 | Value    | Threshold | Converged? |
|----------------------|----------|-----------|------------|
| Maximum Force        | 0.000008 | 0.000450  | YES        |
| RMS Force            | 0.000002 | 0.000300  | YES        |
| Maximum Displacement | 0.018462 | 0.001800  | NO         |
| RMS Displacement     | 0.002295 | 0.001200  | NO         |

Zero-point correction = 0.629662 (Hartree/Particle)  
 Thermal correction to Energy = 0.687168  
 Thermal correction to Enthalpy = 0.688286  
 Thermal correction to Gibbs Free Energy = 0.524533  
 Sum of electronic and zero-point Energies = -2018.929768  
 Sum of electronic and thermal Energies = -2018.872262  
 Sum of electronic and thermal Enthalpies = -2018.871144  
 Sum of electronic and thermal Free Energies = -2019.034898

| E (Thermal) | CV             | S              |
|-------------|----------------|----------------|
| KCal/Mol    | Cal/Mol-Kelvin | Cal/Mol-Kelvin |

Total 431.204 181.874 290.973

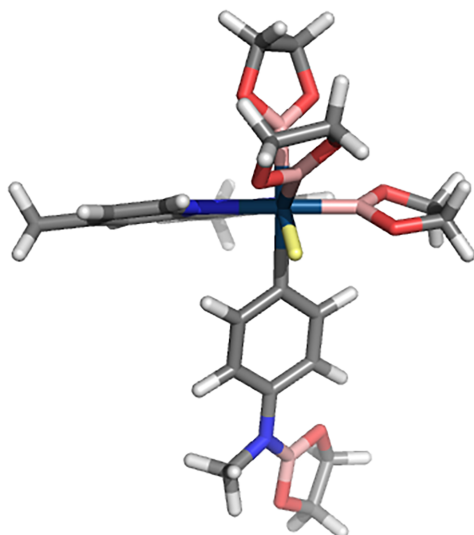

C,0.398059,2.794752,2.49018  
C,-0.172871,2.041472,1.464882  
N,-0.368362,0.714242,1.607  
C,-0.011192,0.123033,2.754957  
C,0.560511,0.818973,3.806122  
C,0.781491,2.191479,3.684001  
C,-0.61839,2.644301,0.189003  
N,-1.204777,1.811262,-0.689708  
C,-1.66167,2.305533,-1.845596  
C,-1.537943,3.64177,-2.189473  
C,-0.917164,4.523592,-1.30293  
C,-0.45922,4.000363,-0.097338  
Ir,-1.168272,-0.426827,-0.155646  
B,-1.038078,-2.341332,0.499981  
O,-0.860717,-3.460369,-0.314867  
C,-0.829345,-4.621262,0.500227  
C,-0.545795,-4.087289,1.900799  
O,-0.949036,-2.725462,1.841853  
C,0.934025,-0.485646,-0.858669  
C,1.87218,-1.317018,-0.226038  
C,3.240198,-1.197491,-0.438847  
C,3.749203,-0.233602,-1.321902  
C,2.826044,0.579501,-1.990608  
C,1.457665,0.445754,-1.762716  
B,6.165177,-0.520656,-0.667918  
O,7.497403,-0.322784,-0.967222  
C,8.254766,-0.968297,0.048289  
C,7.253706,-1.203005,1.182195  
O,5.977766,-1.123259,0.555877  
B,-3.101107,-0.206689,0.697911  
O,-3.548238,-0.784787,1.87543  
C,-4.846881,-0.27692,2.166409  
C,-5.30853,0.33657,0.85014  
O,-4.099021,0.604293,0.151141  
B,-2.642039,-1.118552,-1.422793  
O,-2.904051,-0.507469,-2.650467  
C,-4.158991,-0.986959,-3.117049  
C,-4.348258,-2.302556,-2.372419  
O,-3.544598,-2.157101,-1.207849  
H,-0.466822,-1.069091,-1.488508  
H,-2.137977,1.580419,-2.505887

H,0.026838,4.665393,0.613093  
H,-1.920089,3.994345,-3.146076  
C,-0.768177,5.974455,-1.633542  
H,0.548245,3.86524,2.370233  
C,1.406892,2.974555,4.793492  
H,0.83213,0.291801,4.719095  
H,-0.206676,-0.947745,2.809008  
H,-4.942244,-0.257316,-2.856785  
H,-4.136347,-1.100854,-4.206984  
H,-5.389789,-2.491068,-2.086281  
H,-3.988196,-3.162821,-2.956473  
H,1.531595,-2.0909,0.466078  
H,-5.885538,1.260037,0.976096  
H,-5.910219,-0.372262,0.258323  
H,-4.771786,0.473072,2.968063  
H,-5.49462,-1.089442,2.515295  
H,0.526532,-4.136858,2.148918  
H,-1.10371,-4.610632,2.686344  
H,-0.058716,-5.313699,0.140028  
H,-1.802596,-5.132662,0.445899  
H,7.369107,-2.181657,1.661406  
H,7.319713,-0.427456,1.95836  
H,9.09581,-0.331358,0.344913  
H,8.658026,-1.9112,-0.347907  
N,5.135617,-0.112679,-1.562964  
H,3.924468,-1.864748,0.078421  
H,1.405011,4.04972,4.584  
H,0.877921,2.80607,5.740002  
H,2.447685,2.661434,4.949664  
H,-0.114775,6.488787,-0.920293  
H,-0.355065,6.109126,-2.640939  
H,-1.744537,6.477118,-1.618925  
H,0.78125,1.098673,-2.319357  
H,3.165283,1.331879,-2.699691  
C,5.536376,0.581201,-2.77875  
H,5.353598,1.664407,-2.718716  
H,6.604602,0.428028,-2.947189  
H,4.985541,0.1902,-3.644769

## TS7

PhN(Me)Beg\_left\_anti\_4,4'-dimethylbipyridine\_Ir\_(Beg)3\_  
ultrafine\_grid  
E(RM06) = -2019.56349599

| Item                 | Value    | Threshold | Converged? |
|----------------------|----------|-----------|------------|
| Maximum Force        | 0.000006 | 0.000450  | YES        |
| RMS Force            | 0.000002 | 0.000300  | YES        |
| Maximum Displacement | 0.006201 | 0.001800  | NO         |
| RMS Displacement     | 0.001434 | 0.001200  | NO         |

Zero-point correction = 0.629878 (Hartree/Particle)  
Thermal correction to Energy = 0.686928  
Thermal correction to Enthalpy = 0.688046  
Thermal correction to Gibbs Free Energy = 0.528049  
Sum of electronic and zero-point Energies = -2018.933618  
Sum of electronic and thermal Energies = -2018.876568  
Sum of electronic and thermal Enthalpies = -2018.875450  
Sum of electronic and thermal Free Energies = -2019.035447

| E (Thermal) | CV | S |
|-------------|----|---|
|-------------|----|---|

|       |          |                |                |
|-------|----------|----------------|----------------|
|       | KCal/Mol | Cal/Mol-Kelvin | Cal/Mol-Kelvin |
| Total | 431.054  | 181.648        | 284.297        |

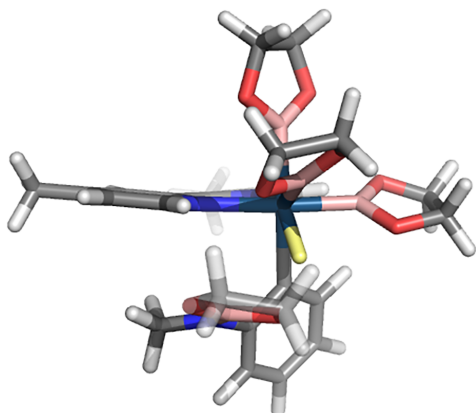

C,-4.150198,0.57305,-0.407393  
 C,-2.760405,0.482579,-0.479227  
 N,-2.119479,-0.648631,-0.120977  
 C,-2.842248,-1.707573,0.26776  
 C,-4.224398,-1.683324,0.342814  
 C,-4.91045,-0.513317,0.014957  
 C,-1.917892,1.590013,-0.981658  
 N,-0.586652,1.420122,-0.885222  
 C,0.218317,2.367665,-1.378119  
 C,-0.258594,3.52071,-1.980065  
 C,-1.635458,3.723276,-2.085305  
 C,-2.464907,2.730058,-1.574129  
 Ir,0.133008,-0.608657,-0.011447  
 B,0.541852,-2.471387,0.68014  
 O,1.645146,-2.820317,1.458761  
 C,1.589553,-4.210365,-1.737118  
 C,0.137819,-4.587428,1.461829  
 O,-0.327269,-3.563951,0.591471  
 C,-0.144345,0.097388,2.095667  
 C,-0.760273,-0.827421,2.957548  
 C,-1.299643,-0.467831,4.188936  
 C,-1.200975,0.8504,4.622332  
 C,-0.544751,1.775262,3.822559  
 C,-0.007122,1.414108,2.580282  
 B,2.052723,2.313499,1.524635  
 O,2.862463,1.284172,1.950534  
 C,4.170279,1.530151,1.459911  
 C,4.056939,2.812797,0.614284  
 O,2.724538,3.268992,0.791354  
 B,0.138266,-1.328439,-2.006087  
 O,-0.339381,-2.560856,-2.425019  
 C,-0.303131,-2.60242,-3.84822  
 C,0.629446,-1.459047,-4.227951  
 O,0.582887,-0.588227,-3.104043  
 B,2.040767,-0.652623,-0.789974  
 O,2.765318,0.506696,-1.082124  
 C,3.834984,0.14129,-1.944119  
 C,4.036313,-1.340852,-1.663672  
 O,2.764733,-1.772403,-1.198939  
 H,1.185101,-0.205136,1.181487  
 H,1.286203,2.178566,-1.277027  
 H,-3.542731,2.847235,-1.662268  
 H,0.442315,4.259061,-2.366796  
 C,-2.190488,4.959246,-2.718559

H,-4.656166,1.498185,-0.674392  
 C,-6.399688,-0.433833,0.120622  
 H,-4.764382,-2.573332,0.661388  
 H,-2.267132,-2.599987,0.513291  
 H,3.533638,0.32064,-2.988055  
 H,4.722055,0.75106,-1.726372  
 H,4.326497,-1.915355,-2.551268  
 H,4.789274,-1.512089,-0.878282  
 H,-0.855082,-1.868859,2.643533  
 H,-1.608334,1.152255,5.586331  
 H,-0.419069,2.800359,4.172249  
 H,0.320849,-0.924328,-5.133668  
 H,1.666015,-1.807316,-4.365503  
 H,-1.320195,-2.453792,-4.24101  
 H,0.05543,-3.582589,-4.183055  
 H,-0.4683,-4.58256,2.382125  
 H,0.026015,-5.567392,0.983081  
 H,1.894575,-4.39928,2.773514  
 H,2.284756,-4.744389,1.071148  
 H,4.756409,3.594159,0.938736  
 H,4.227578,2.61687,-0.45284  
 H,4.501621,0.668696,0.86533  
 H,4.85613,1.648127,2.309925  
 N,0.676789,2.418659,1.836778  
 H,-1.792934,-1.218004,4.806569  
 H,-6.794813,0.46429,-0.366615  
 H,-6.87495,-1.312602,-0.332554  
 H,-6.711075,-0.409311,1.173534  
 H,-3.273998,4.889228,-2.86516  
 H,-1.991537,5.839037,-2.091994  
 H,-1.721314,5.148751,-3.692099  
 C,-0.056159,3.644512,1.577818  
 H,-0.212652,4.245782,2.486739  
 H,0.497889,4.259743,0.861643  
 H,-1.044579,3.417145,1.150034

## TS8

PhN(Me)Beg\_left\_syn\_4,4'-dimethylbipyridine\_Ir\_(Beg)3\_  
 ultrafine\_grid  
 E(RM06) = -2019.56240728

| Item                 | Value    | Threshold | Converged? |
|----------------------|----------|-----------|------------|
| Maximum Force        | 0.000004 | 0.000450  | YES        |
| RMS Force            | 0.000002 | 0.000300  | YES        |
| Maximum Displacement | 0.003059 | 0.001800  | NO         |
| RMS Displacement     | 0.000449 | 0.001200  | YES        |

Zero-point correction = 0.629836 (Hartree/Particle)  
 Thermal correction to Energy = 0.686751  
 Thermal correction to Enthalpy = 0.687869  
 Thermal correction to Gibbs Free Energy = 0.531128  
 Sum of electronic and zero-point Energies = -2018.932572  
 Sum of electronic and thermal Energies = -2018.875656  
 Sum of electronic and thermal Enthalpies = -2018.874538  
 Sum of electronic and thermal Free Energies = -2019.031279

|       | E (Thermal) | CV             | S              |
|-------|-------------|----------------|----------------|
|       | KCal/Mol    | Cal/Mol-Kelvin | Cal/Mol-Kelvin |
| Total | 430.943     | 181.769        | 278.512        |

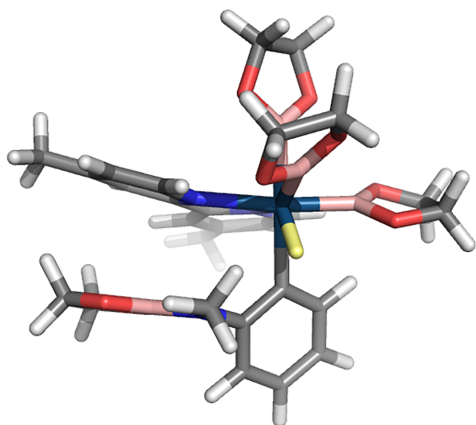

C,-2.299356,1.489658,2.530213  
 C,-1.429737,0.719902,1.759689  
 N,-0.185761,1.150664,1.469616  
 C,0.229663,2.31632,1.984083  
 C,-0.576445,3.110797,2.780948  
 C,-1.88542,2.709801,3.055059  
 C,-1.810669,-0.606348,1.235625  
 N,-1.039689,-1.105672,0.25173  
 C,-1.334209,-2.313329,-0.237167  
 C,-2.399206,-3.074484,0.223408  
 C,-3.197178,-2.585516,1.256016  
 C,-2.880805,-1.325867,1.762923  
 Ir,0.942375,0.054946,-0.147649  
 B,2.69005,1.080397,-0.18001  
 O,3.546534,1.203475,-1.273126  
 C,4.671108,1.980177,-0.889899  
 C,4.219174,2.691517,0.382552  
 O,3.137141,1.902123,0.858566  
 C,0.022471,1.575977,-1.508543  
 C,0.564861,2.872446,-1.443863  
 C,-0.075334,3.988596,-1.974459  
 C,-1.289728,3.837443,-2.634687  
 C,-1.827068,2.564298,-2.75994  
 C,-1.190631,1.443114,-2.213425  
 B,-3.076244,-0.104558,-1.85738  
 O,-3.687261,0.699168,-0.913605  
 C,-4.921161,0.098373,-0.562732  
 C,-4.99169,-1.209185,-1.377357  
 O,-3.818653,-1.226222,-2.171117  
 B,1.748585,-1.219011,1.348917  
 O,2.659471,-0.843951,2.322673  
 C,2.855405,-1.942289,3.208218  
 C,2.298825,-3.137656,2.44443  
 O,1.39374,-2.559843,1.511275  
 B,2.023328,-1.504181,-0.966658  
 O,1.430631,-2.469698,-1.780688  
 C,2.324063,-3.57303,-1.872001  
 C,3.681388,-2.977595,-1.51719  
 O,3.361749,-1.821954,-0.752763  
 H,1.015856,0.271944,-1.770067  
 H,-0.671742,-2.67499,-1.02302  
 H,-3.465337,-0.922248,2.588578  
 H,-2.601267,-4.047846,-0.220698  
 C,-4.339943,-3.372225,1.81672  
 H,-3.31864,1.150062,2.706208  
 C,-2.794735,3.556866,3.886112  
 H,-0.189903,4.049485,3.174257

H,1.252848,2.596514,1.736927  
 H,2.015839,-4.343905,-1.14777  
 H,2.285768,-4.004634,-2.878725  
 H,4.307759,-3.654862,-0.924227  
 H,4.247305,-2.67616,-2.411167  
 H,1.515167,3.031507,-0.932479  
 H,-1.803768,4.696283,-3.063915  
 H,-2.76455,2.410181,-3.295525  
 H,1.775049,-3.859244,3.081906  
 H,3.087459,-3.671135,1.889322  
 H,2.305782,-1.756542,4.14308  
 H,3.920215,-2.040655,3.448689  
 H,3.858956,3.712223,0.175947  
 H,5.003056,2.753892,1.14649  
 H,4.941957,2.672417,-1.696327  
 H,5.52811,1.314461,-0.70602  
 H,-5.004782,-2.099892,-0.730904  
 H,-5.875397,-1.250958,-2.027453  
 H,-5.744906,0.784907,-0.79981  
 H,-4.938175,-0.089859,0.522467  
 N,-1.824593,0.183381,-2.432233  
 H,0.38129,4.973085,-1.874726  
 H,-3.814145,3.15652,3.909722  
 H,-2.430285,3.618192,4.920183  
 H,-2.835781,4.583541,3.501172  
 H,-5.217968,-2.733775,1.982747  
 H,-4.629225,-4.192502,1.149661  
 H,-4.073464,-3.810515,2.787977  
 C,-1.180577,-0.71155,-3.377342  
 H,-0.217898,-1.084353,-2.997402  
 H,-1.829138,-1.574883,-3.561789  
 H,-1.002456,-0.200959,-4.336533

# NMR spectra

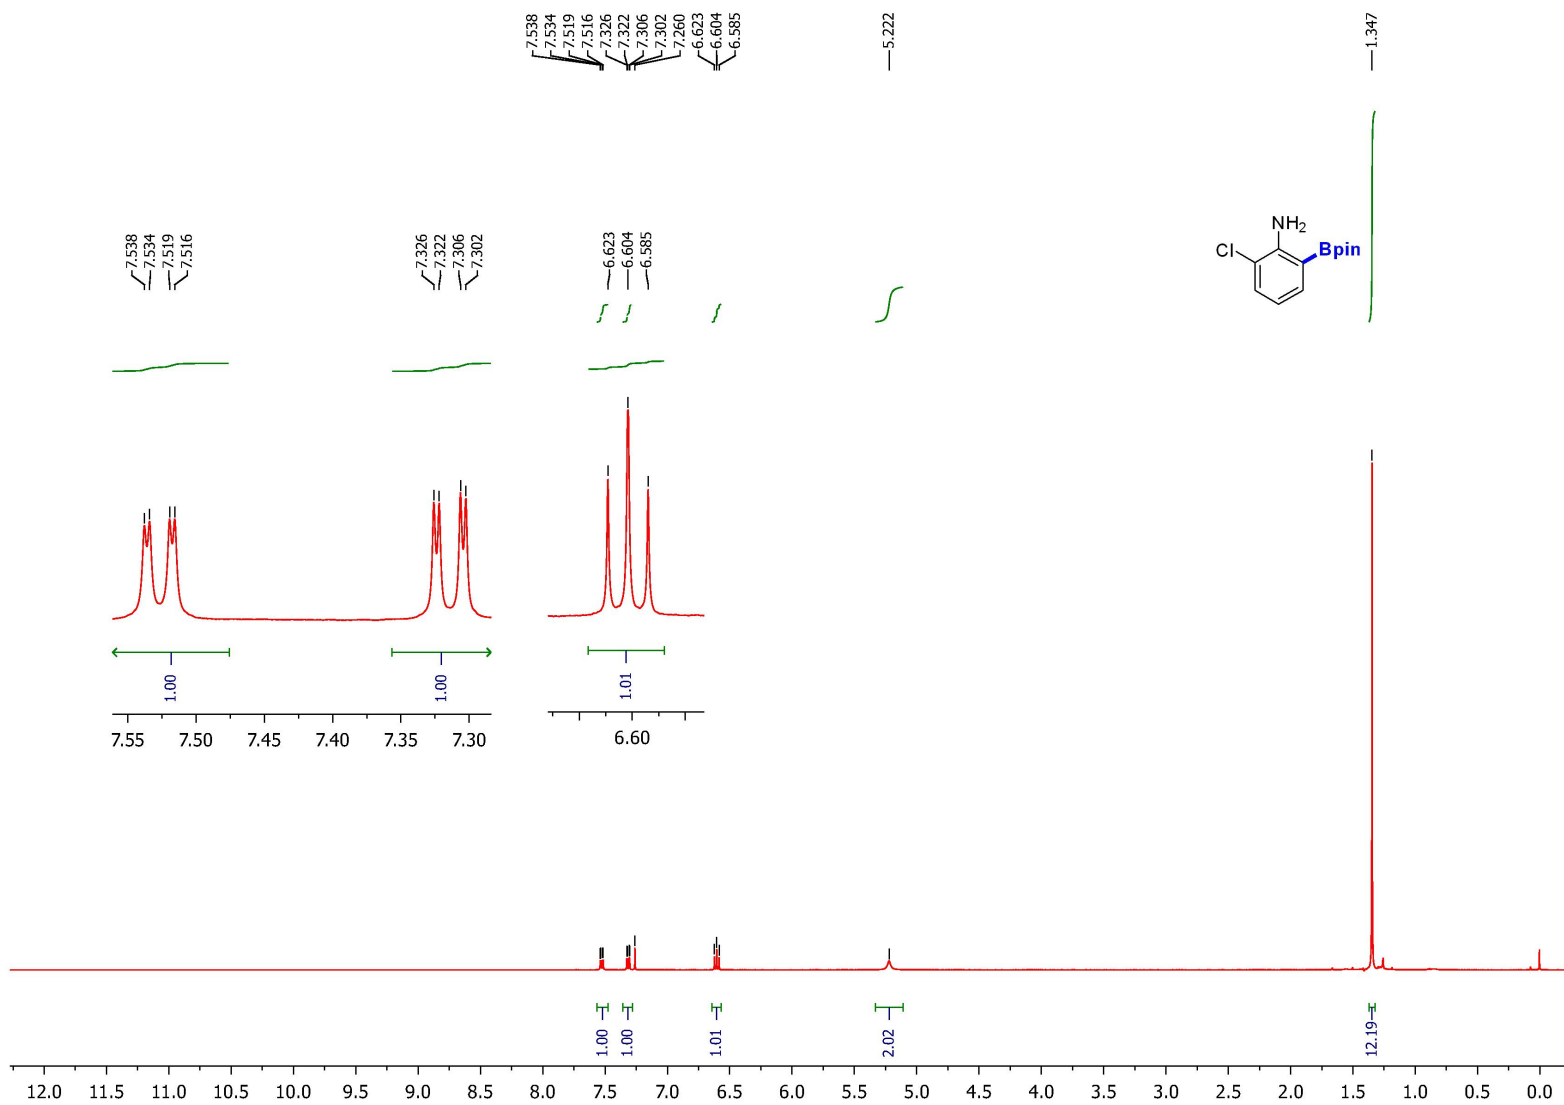

$^1\text{H}$ -NMR (25 °C, 400 MHz,  $\text{CDCl}_3$ )

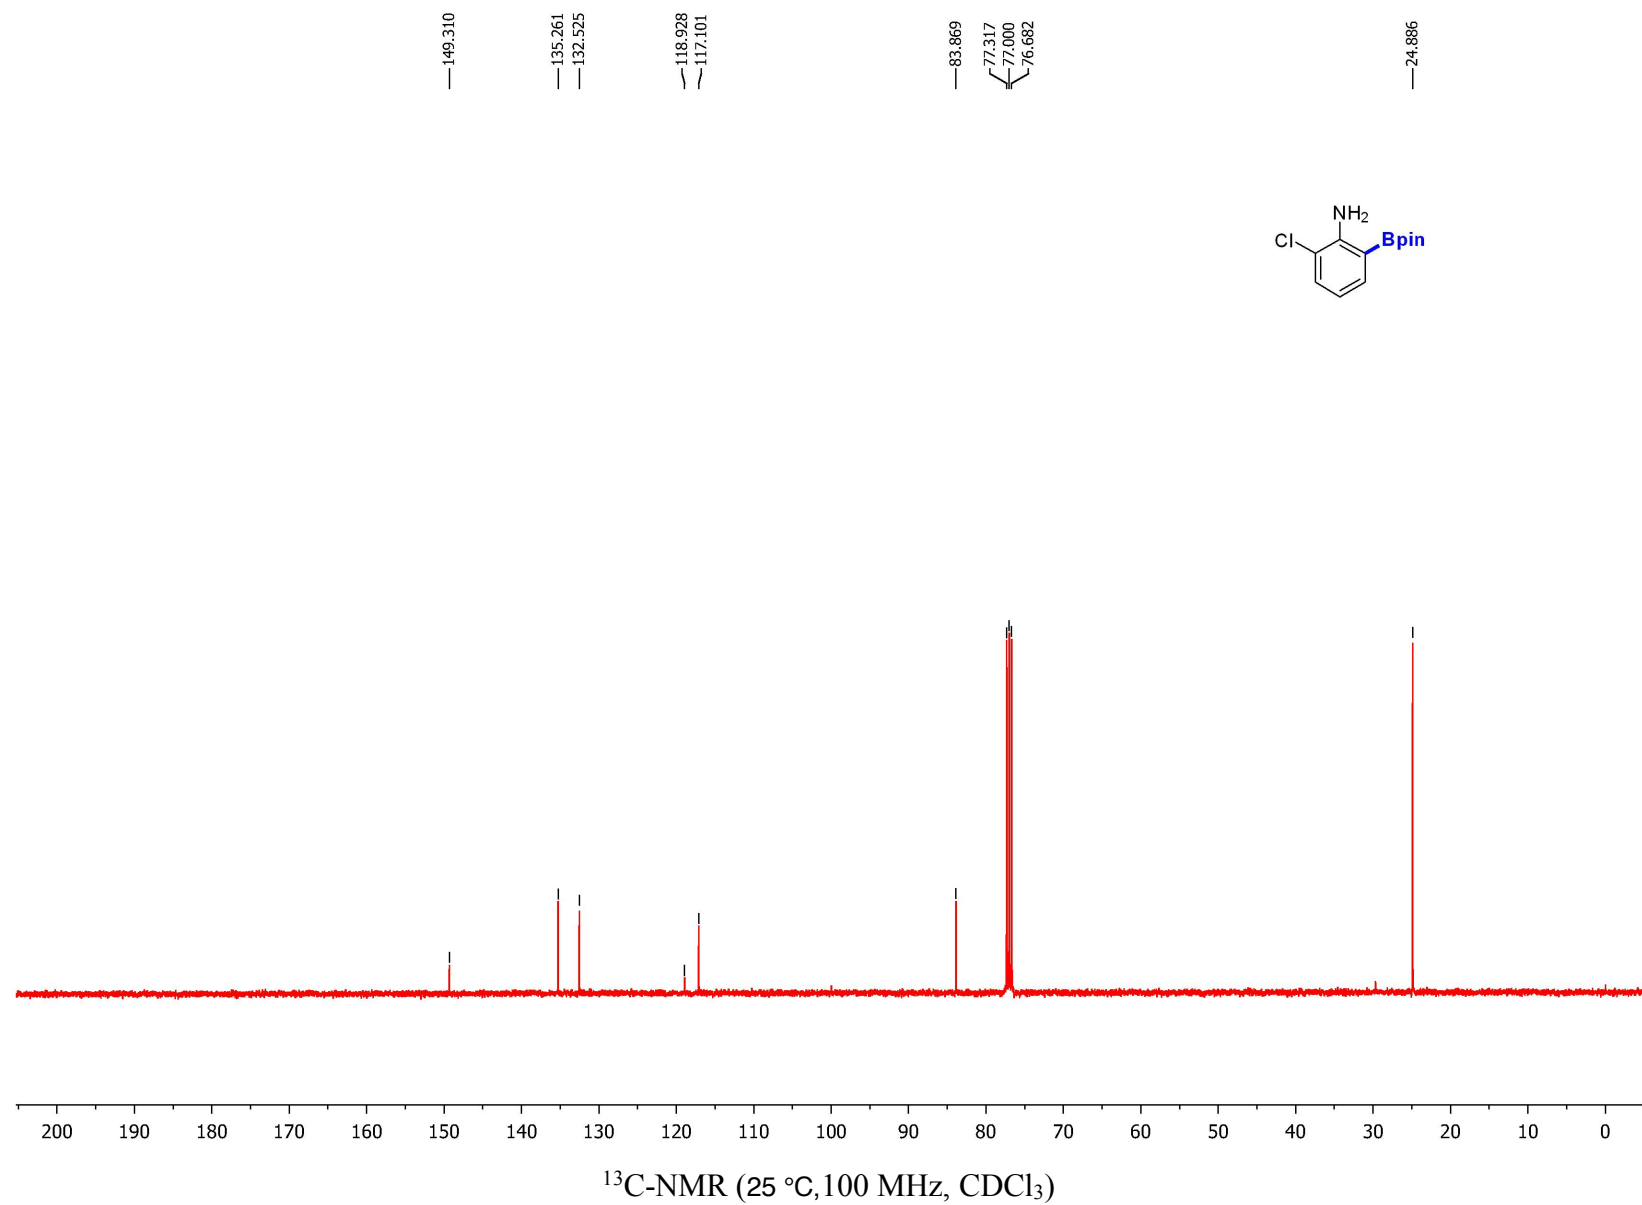

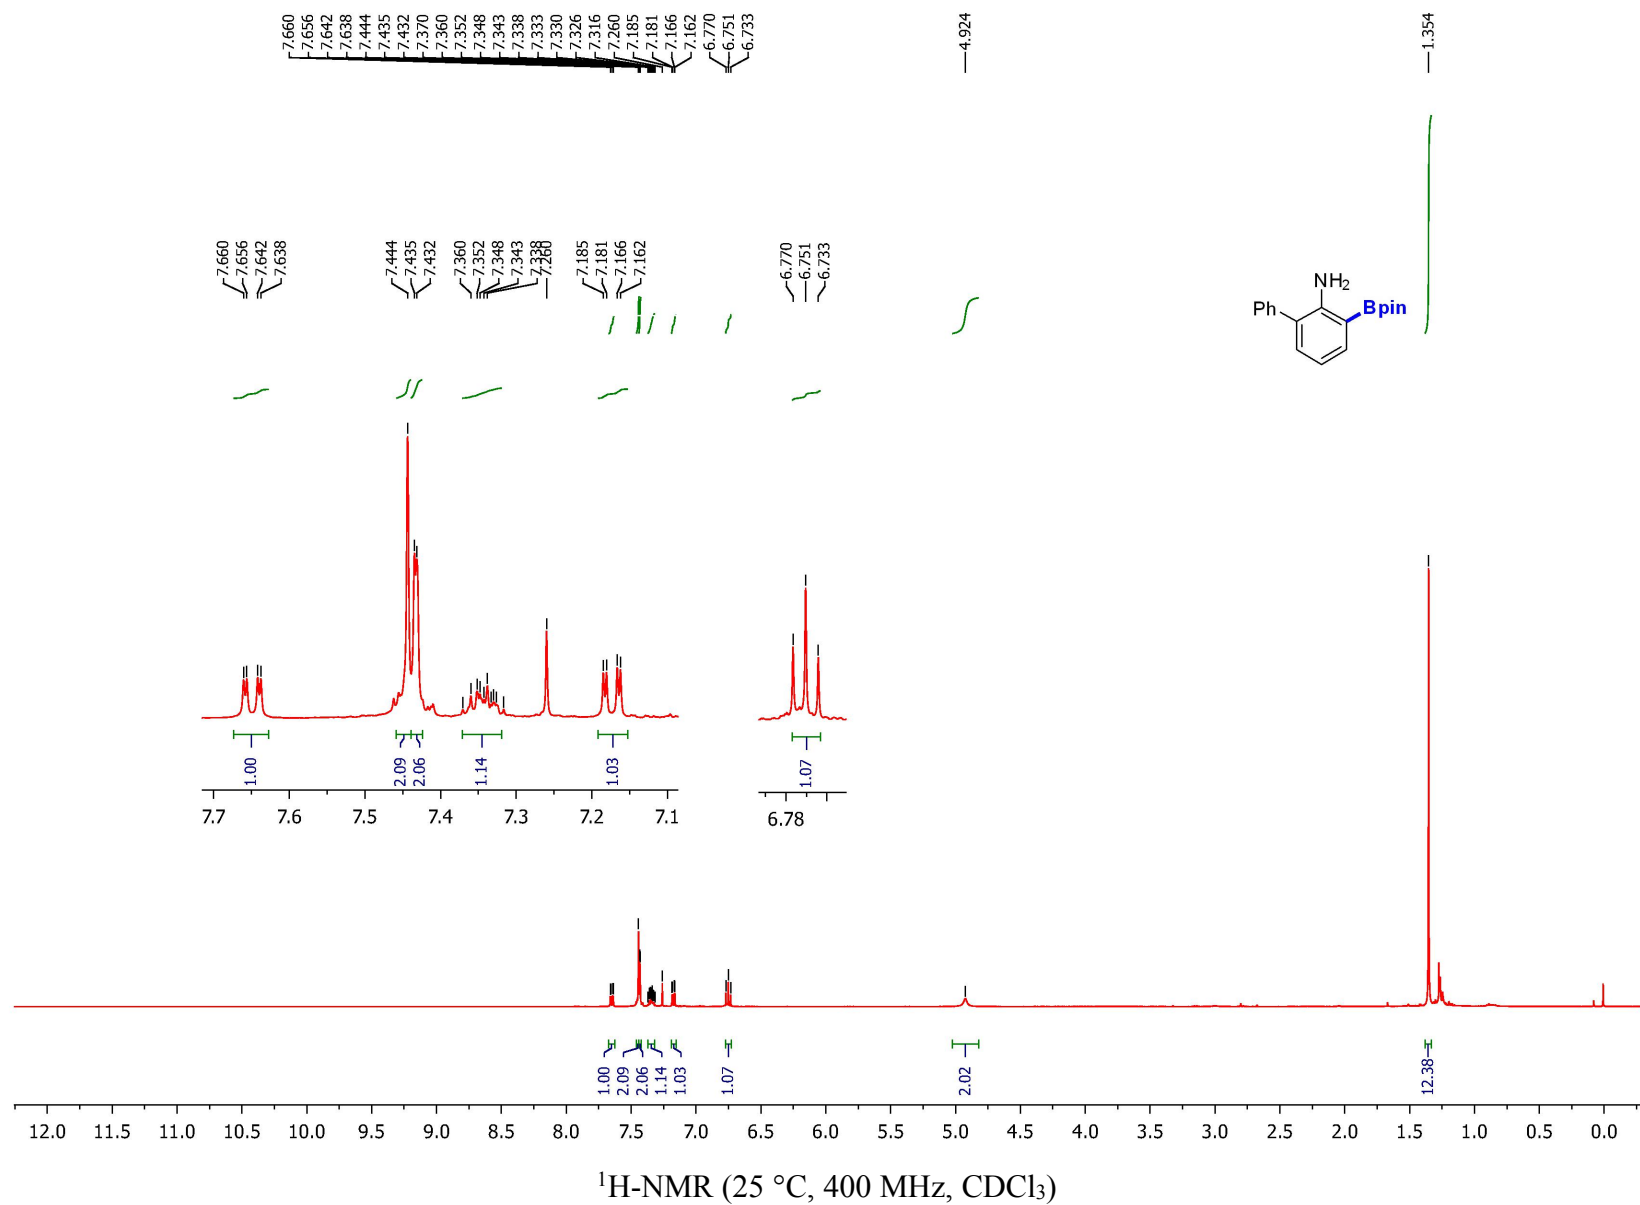

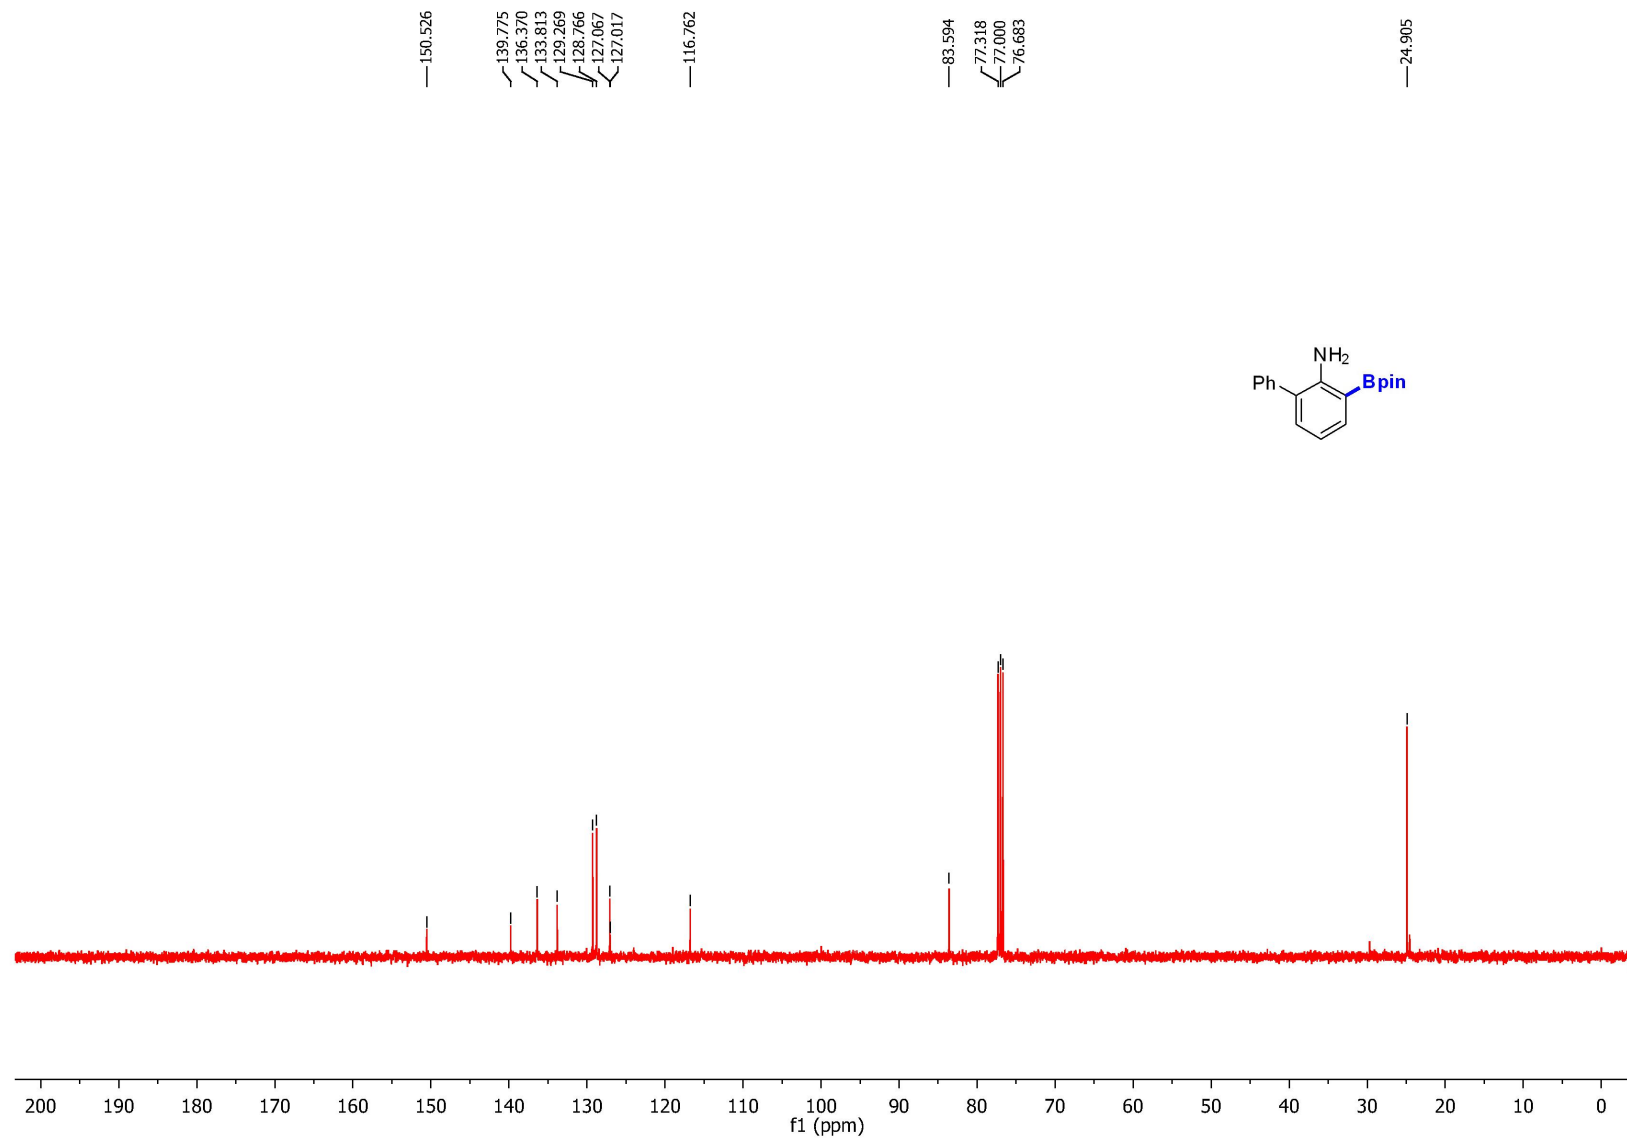

$^{13}\text{C}$ -NMR (25 °C, 100 MHz,  $\text{CDCl}_3$ )

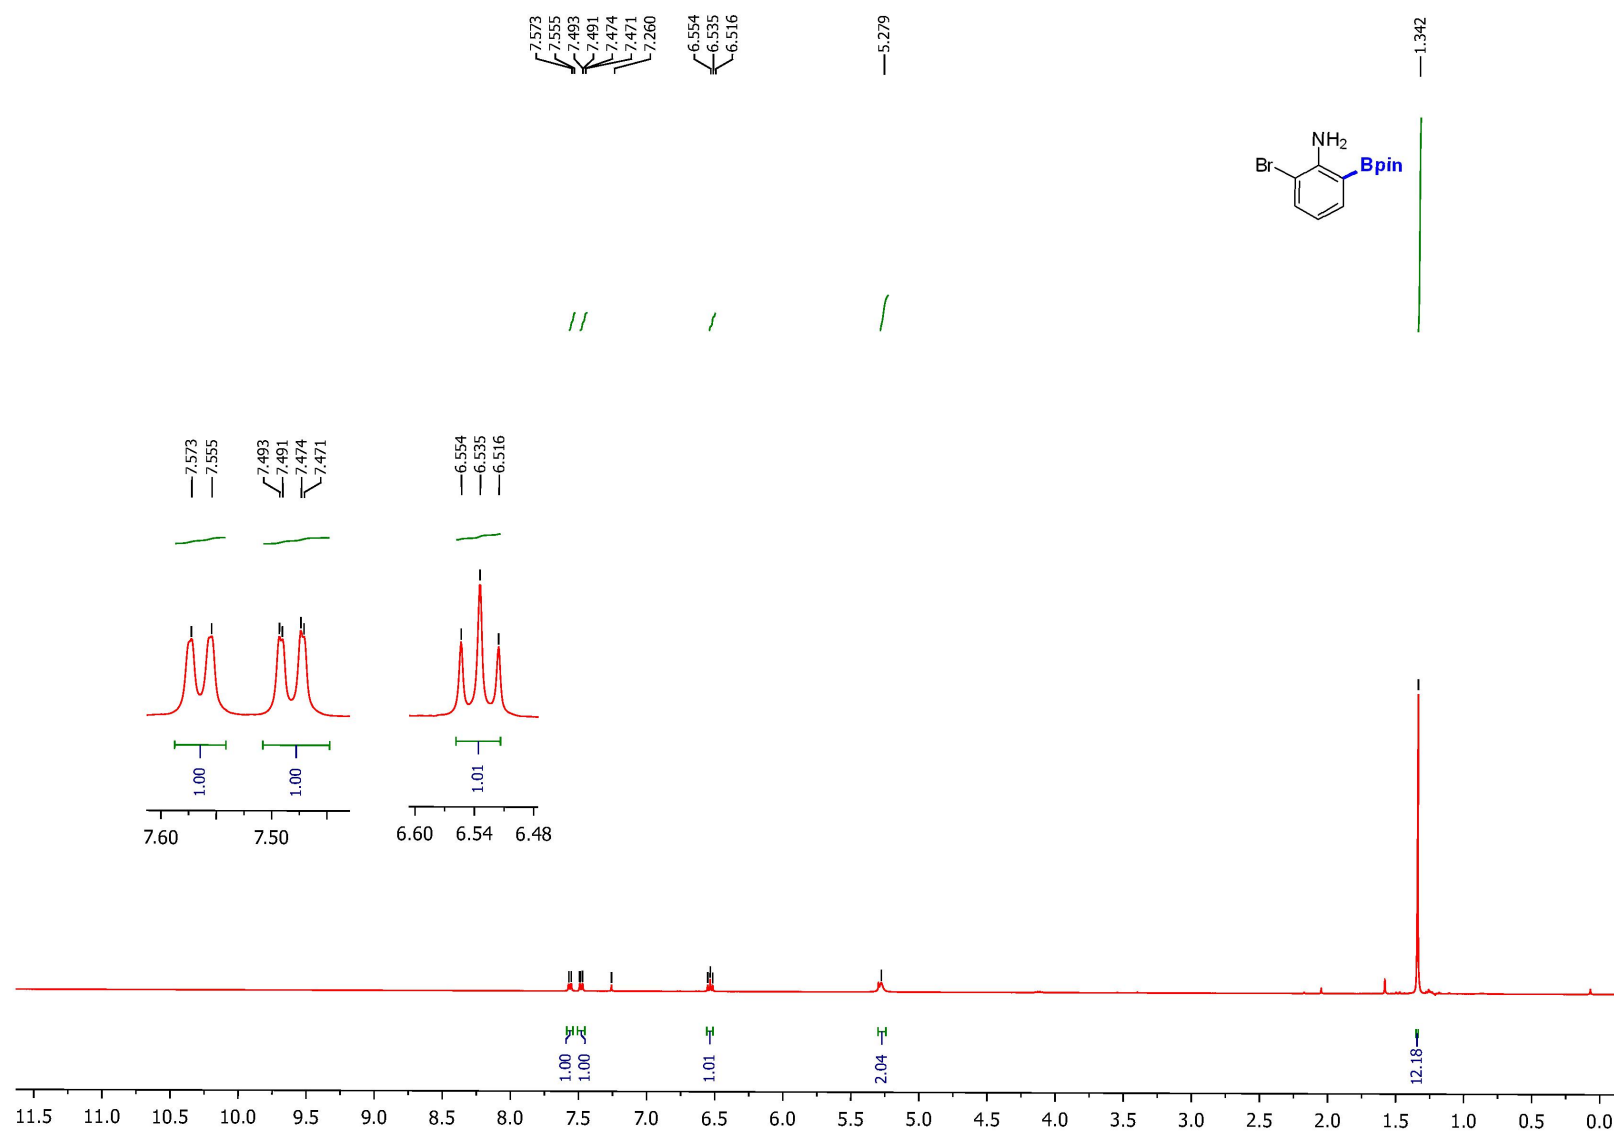

$^1\text{H-NMR}$  (25 °C, 400 MHz,  $\text{CDCl}_3$ )

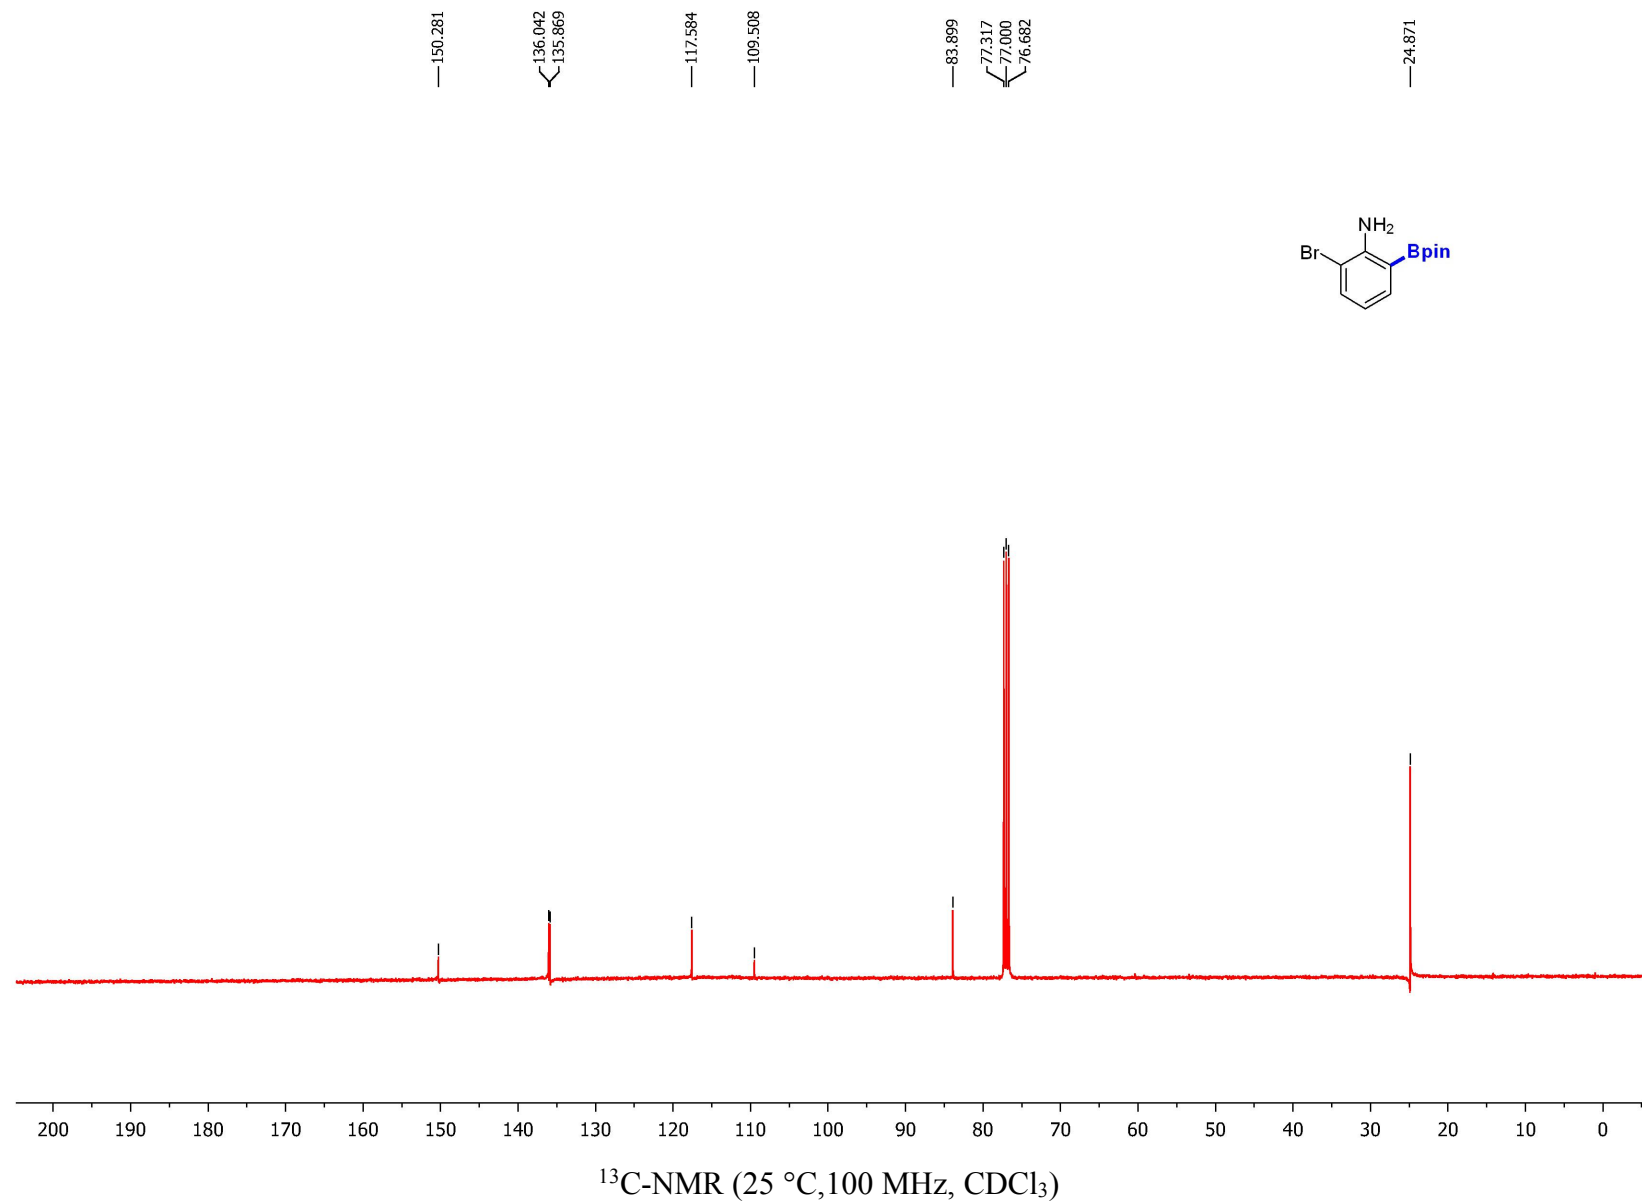

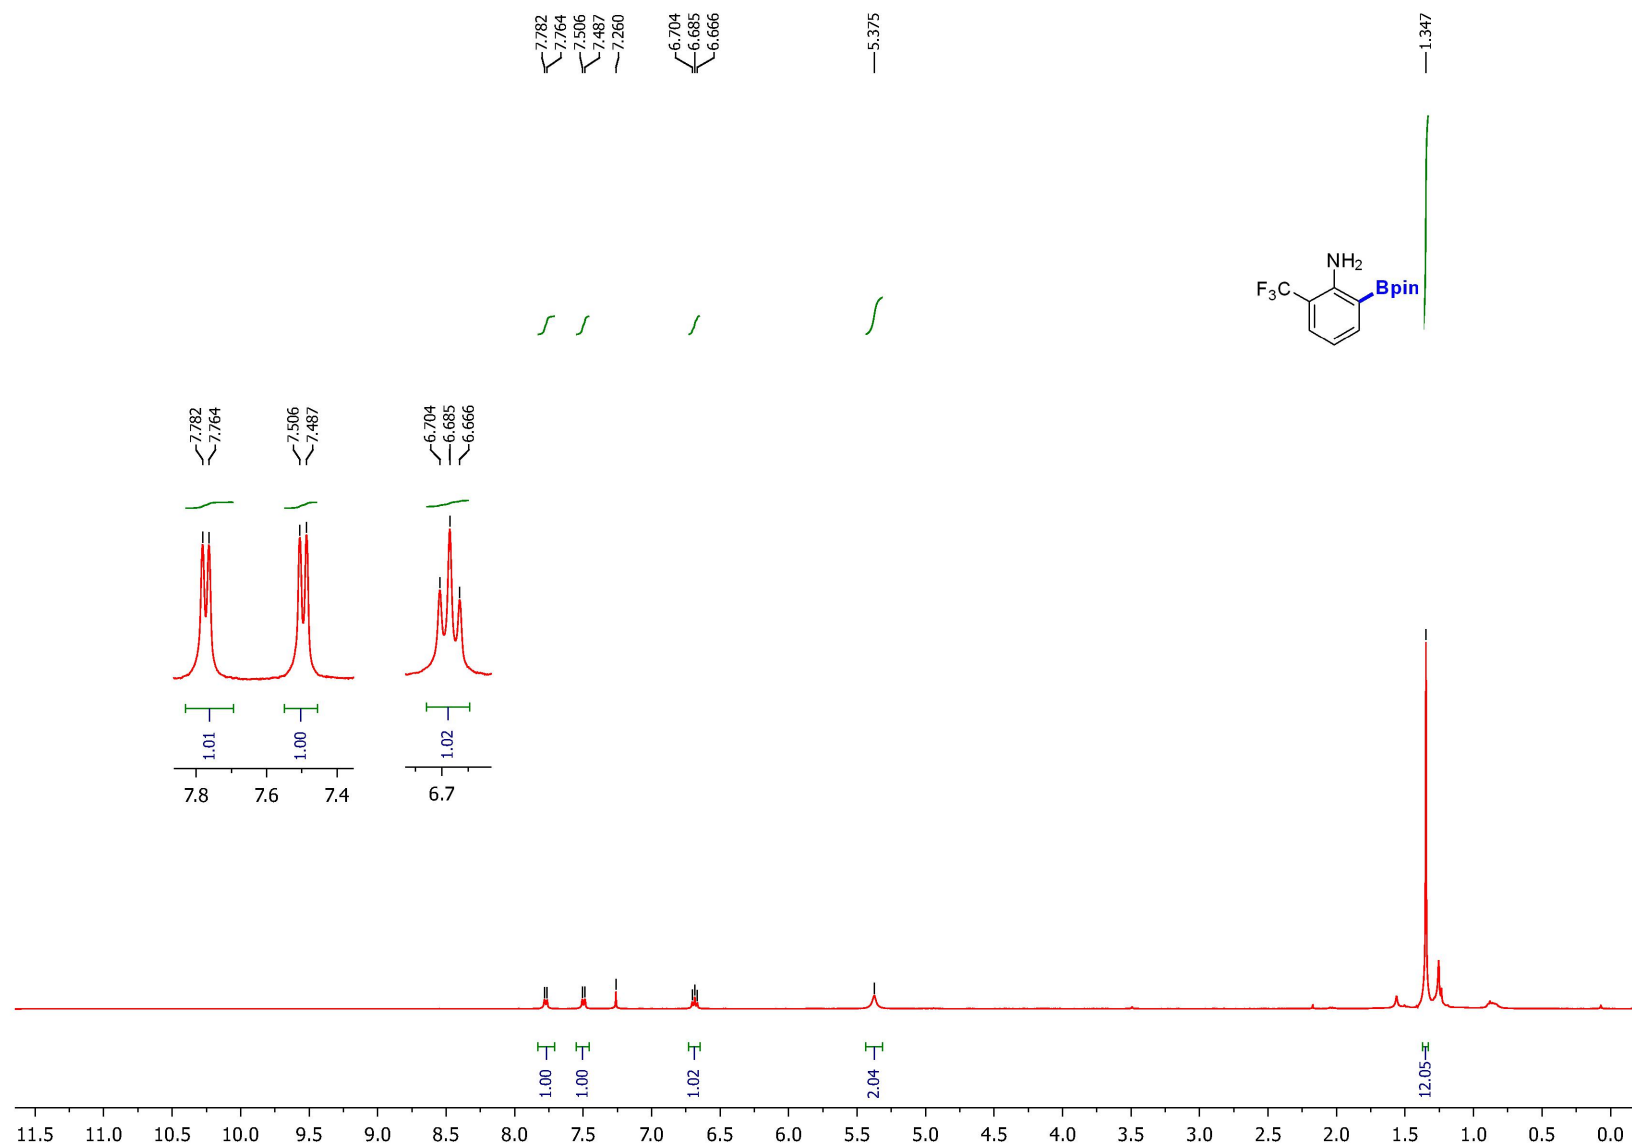

<sup>1</sup>H-NMR (25 °C, 400 MHz, CDCl<sub>3</sub>)

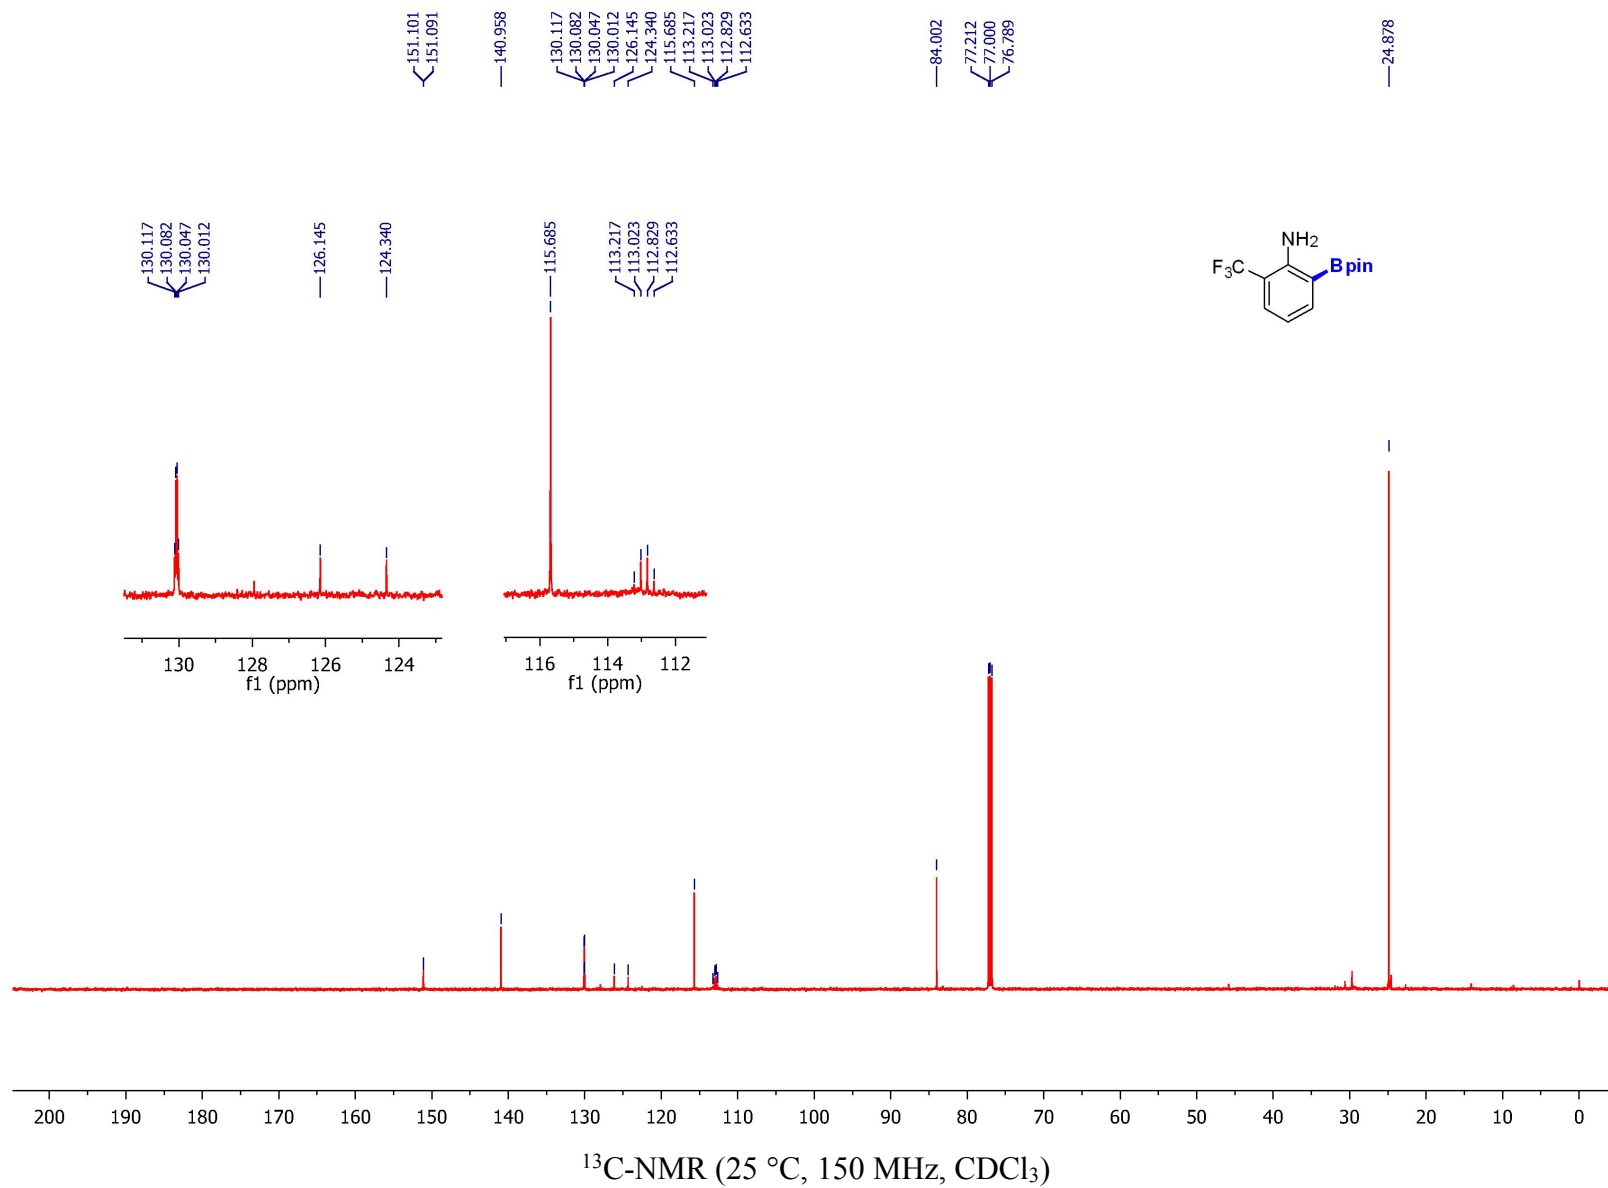

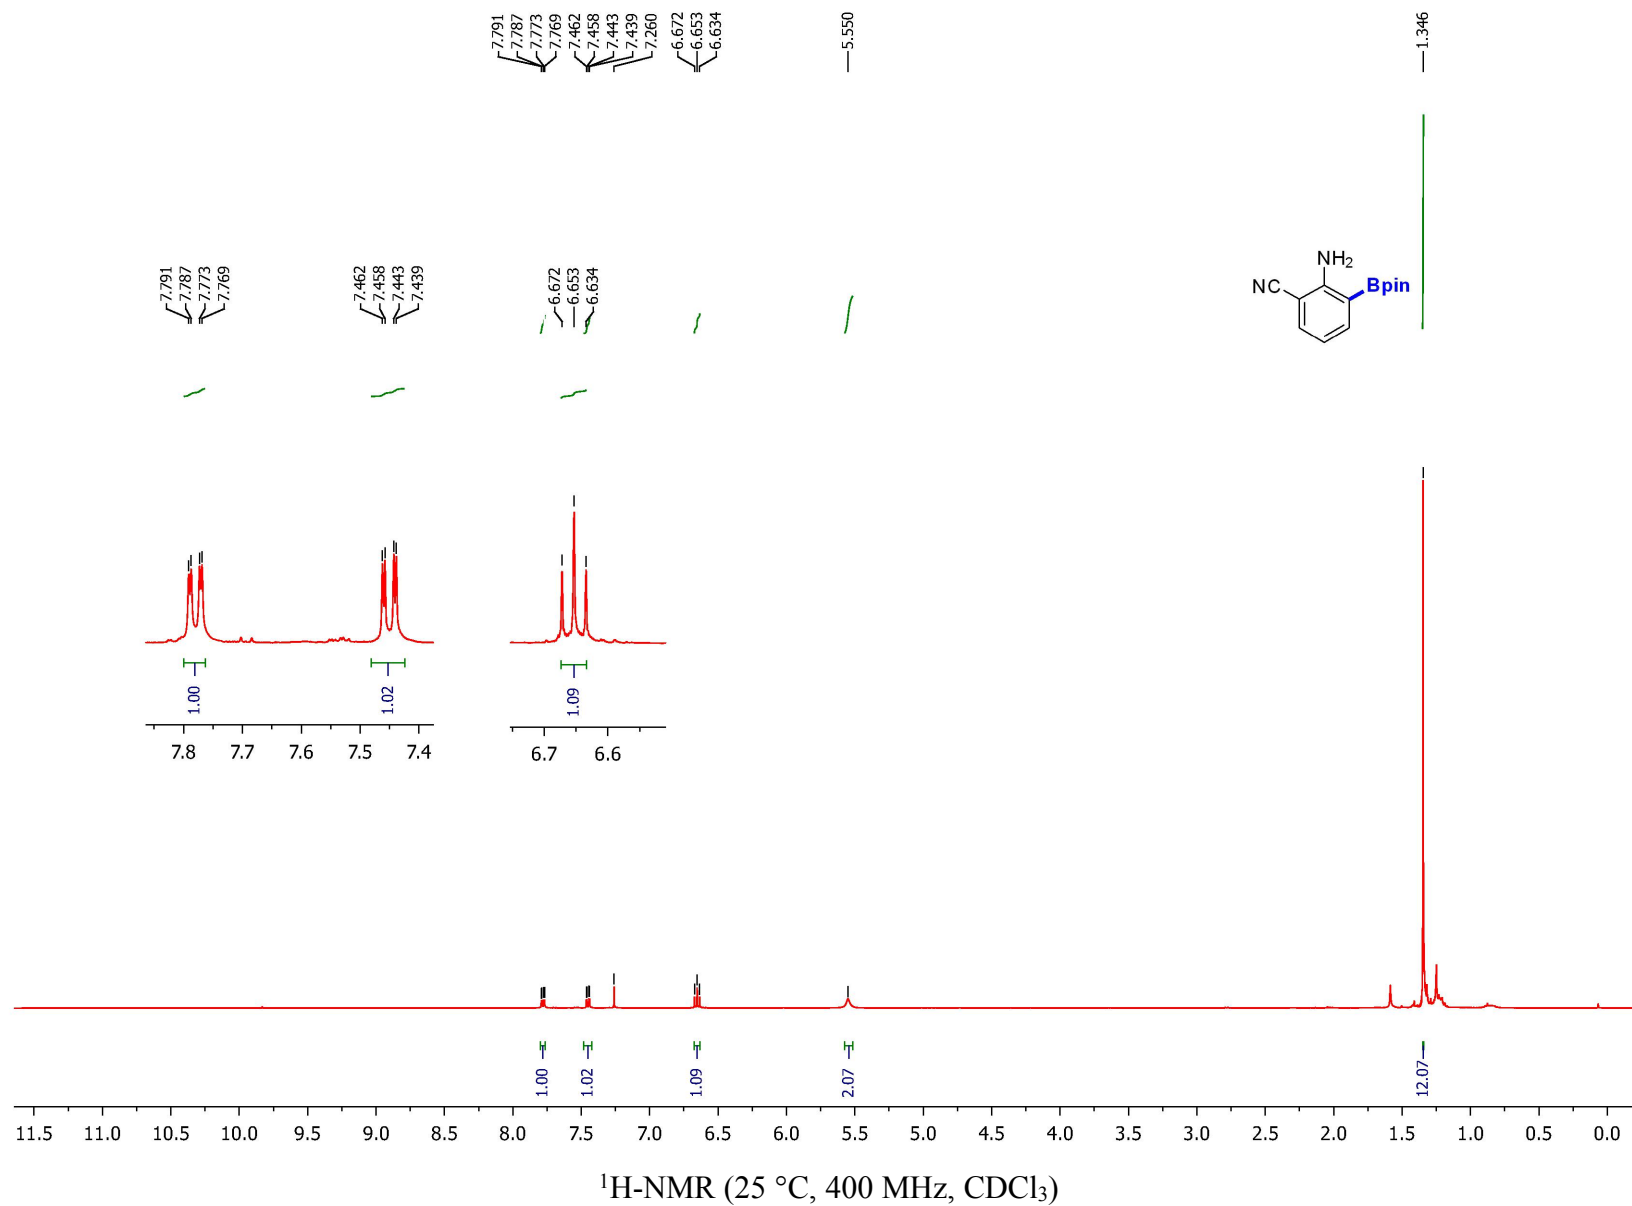

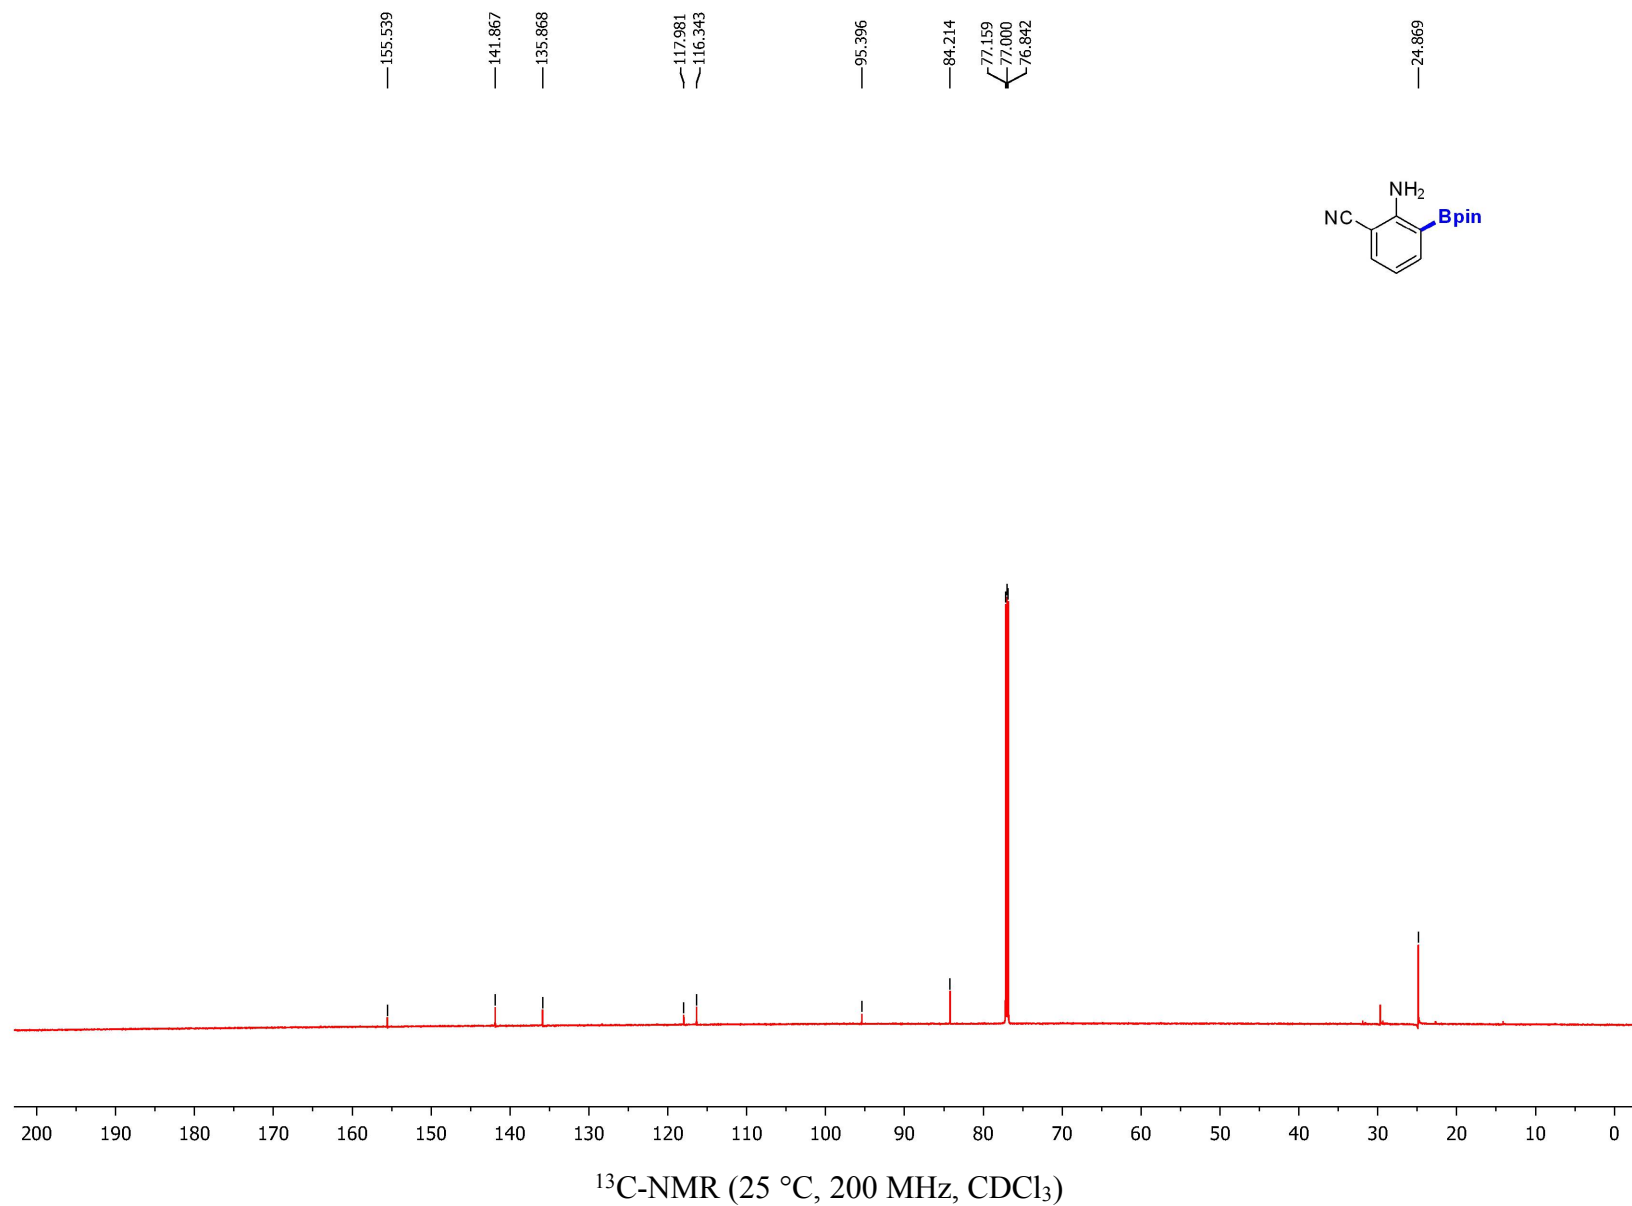

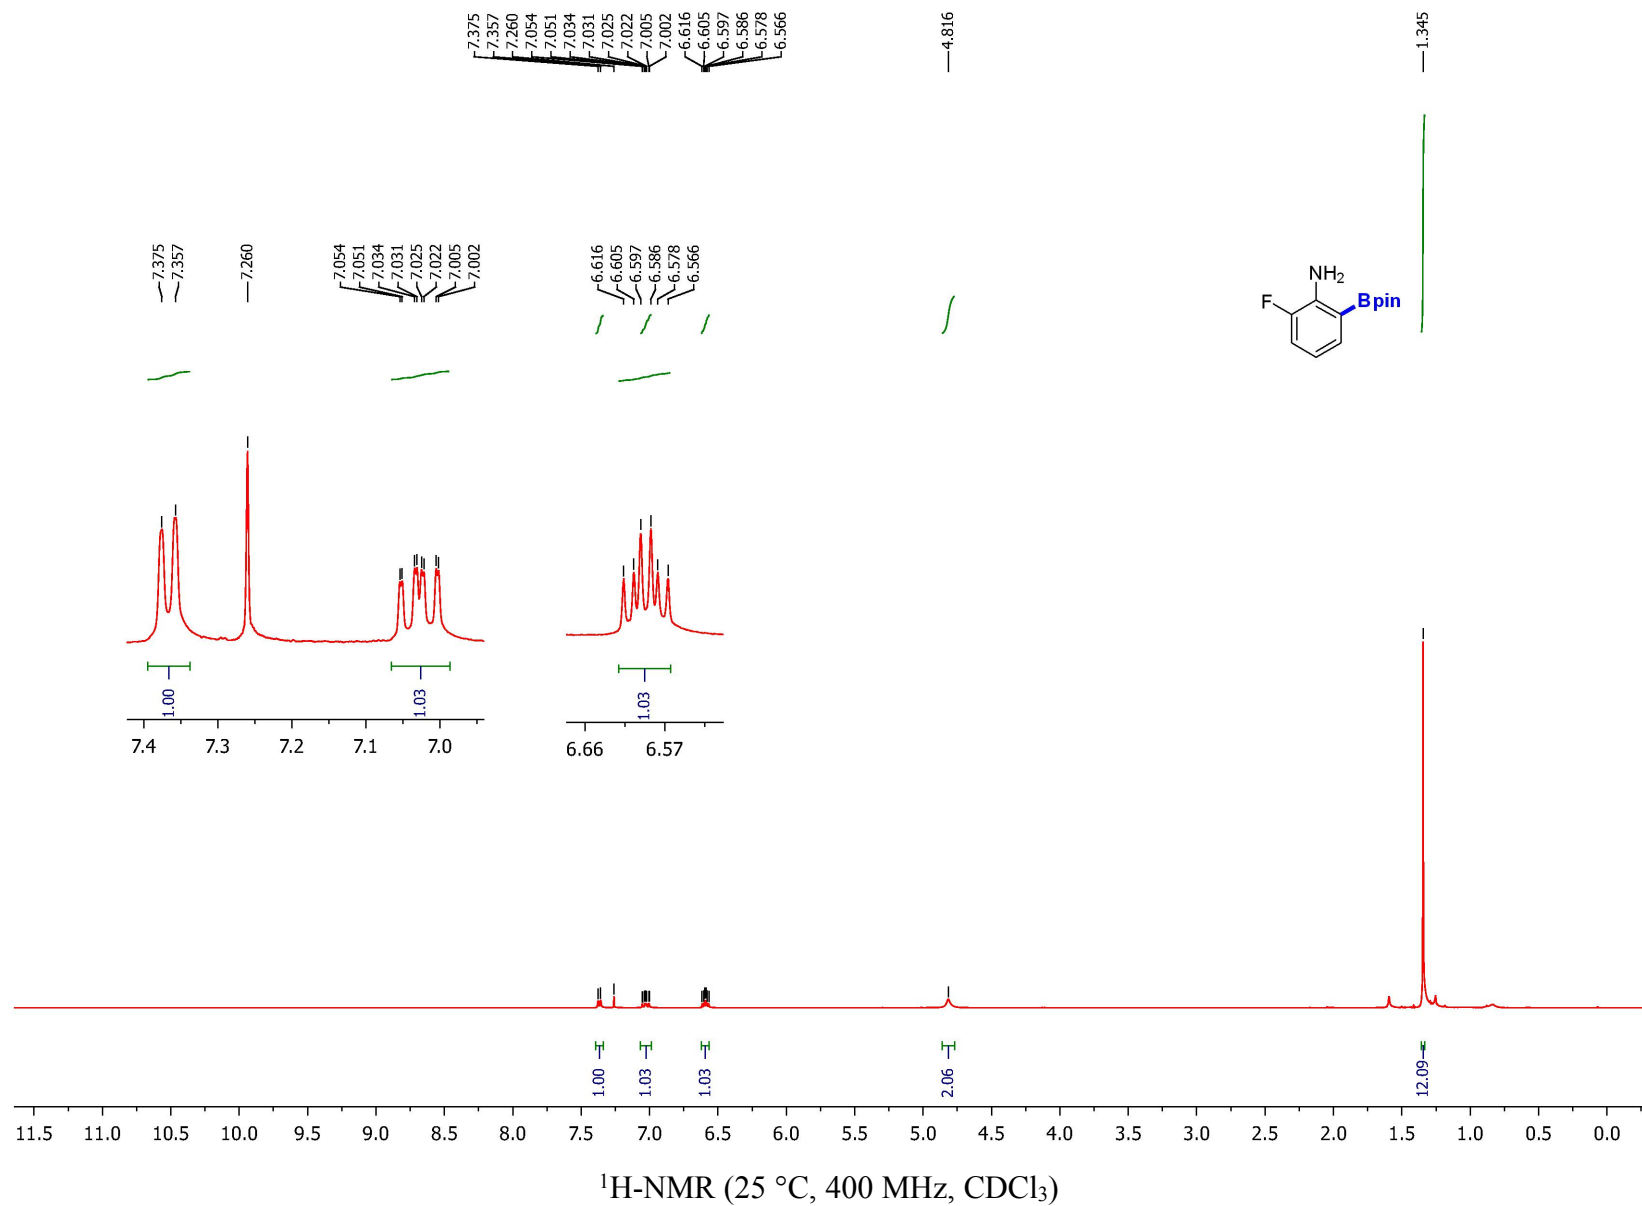





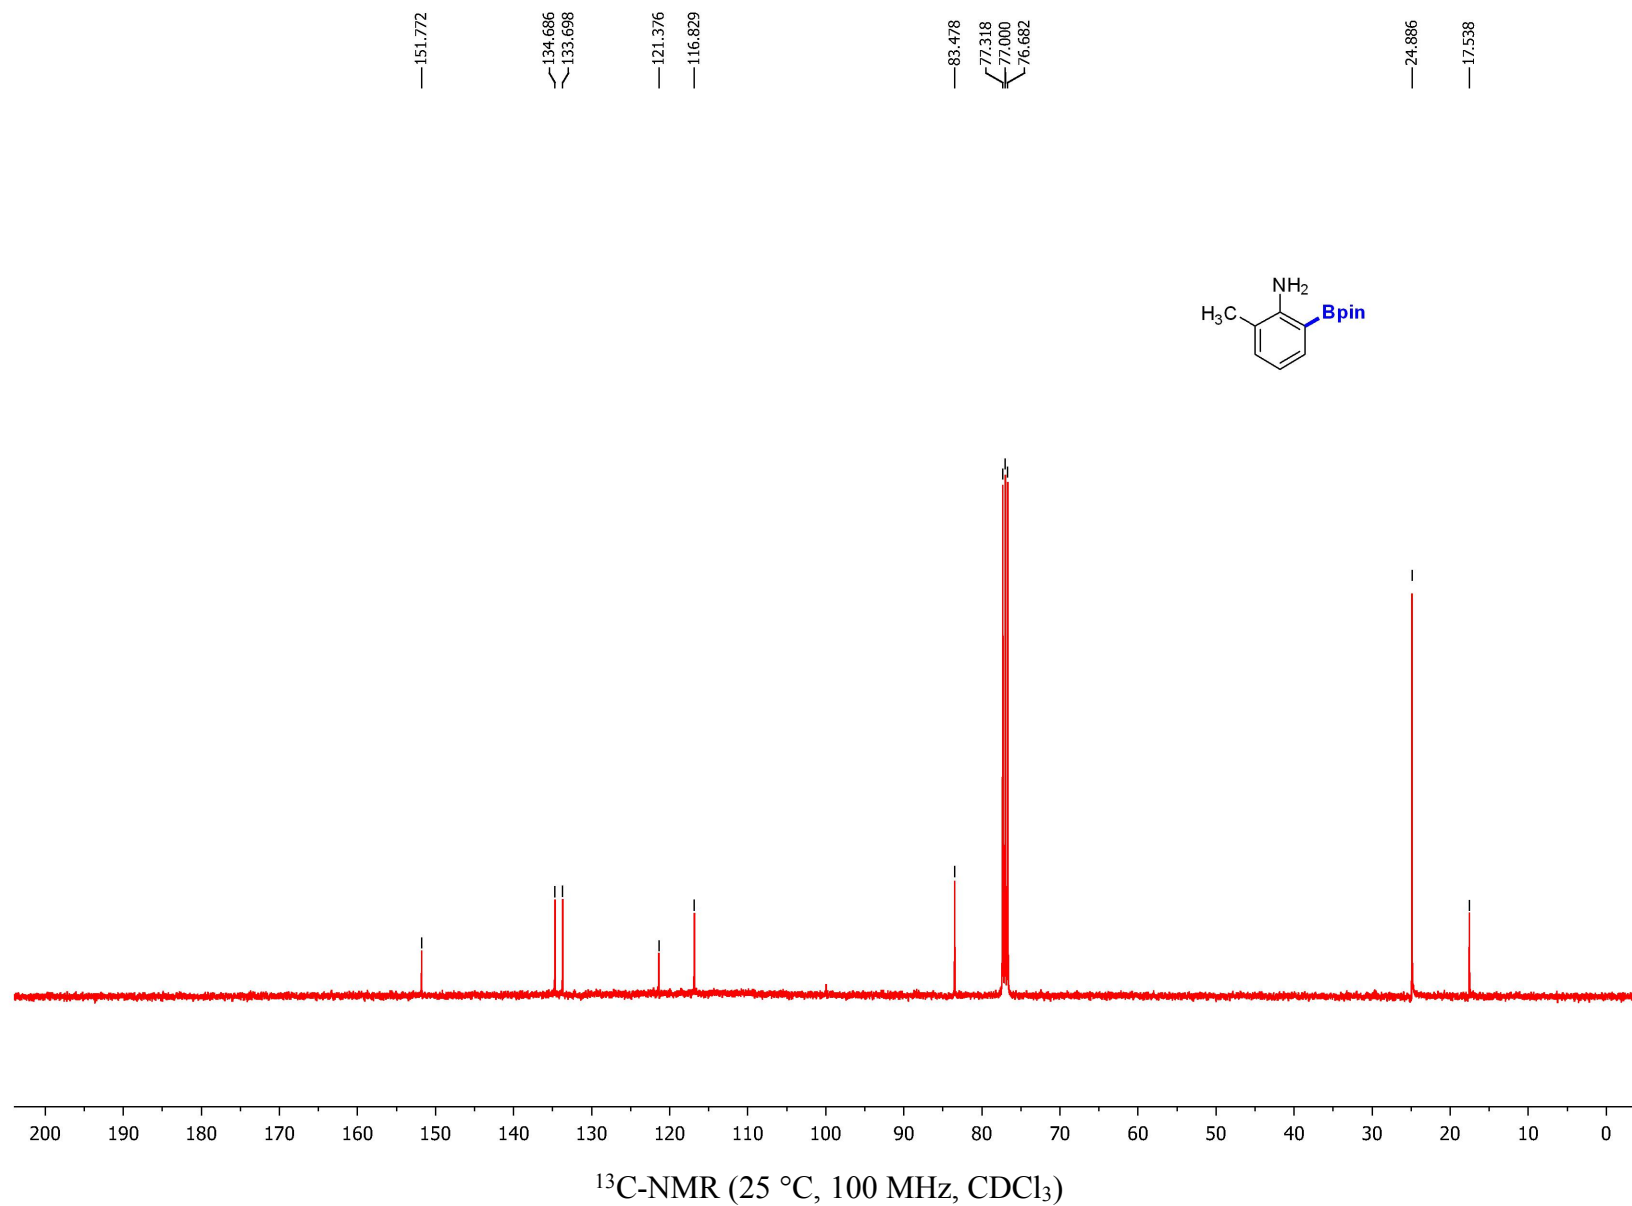

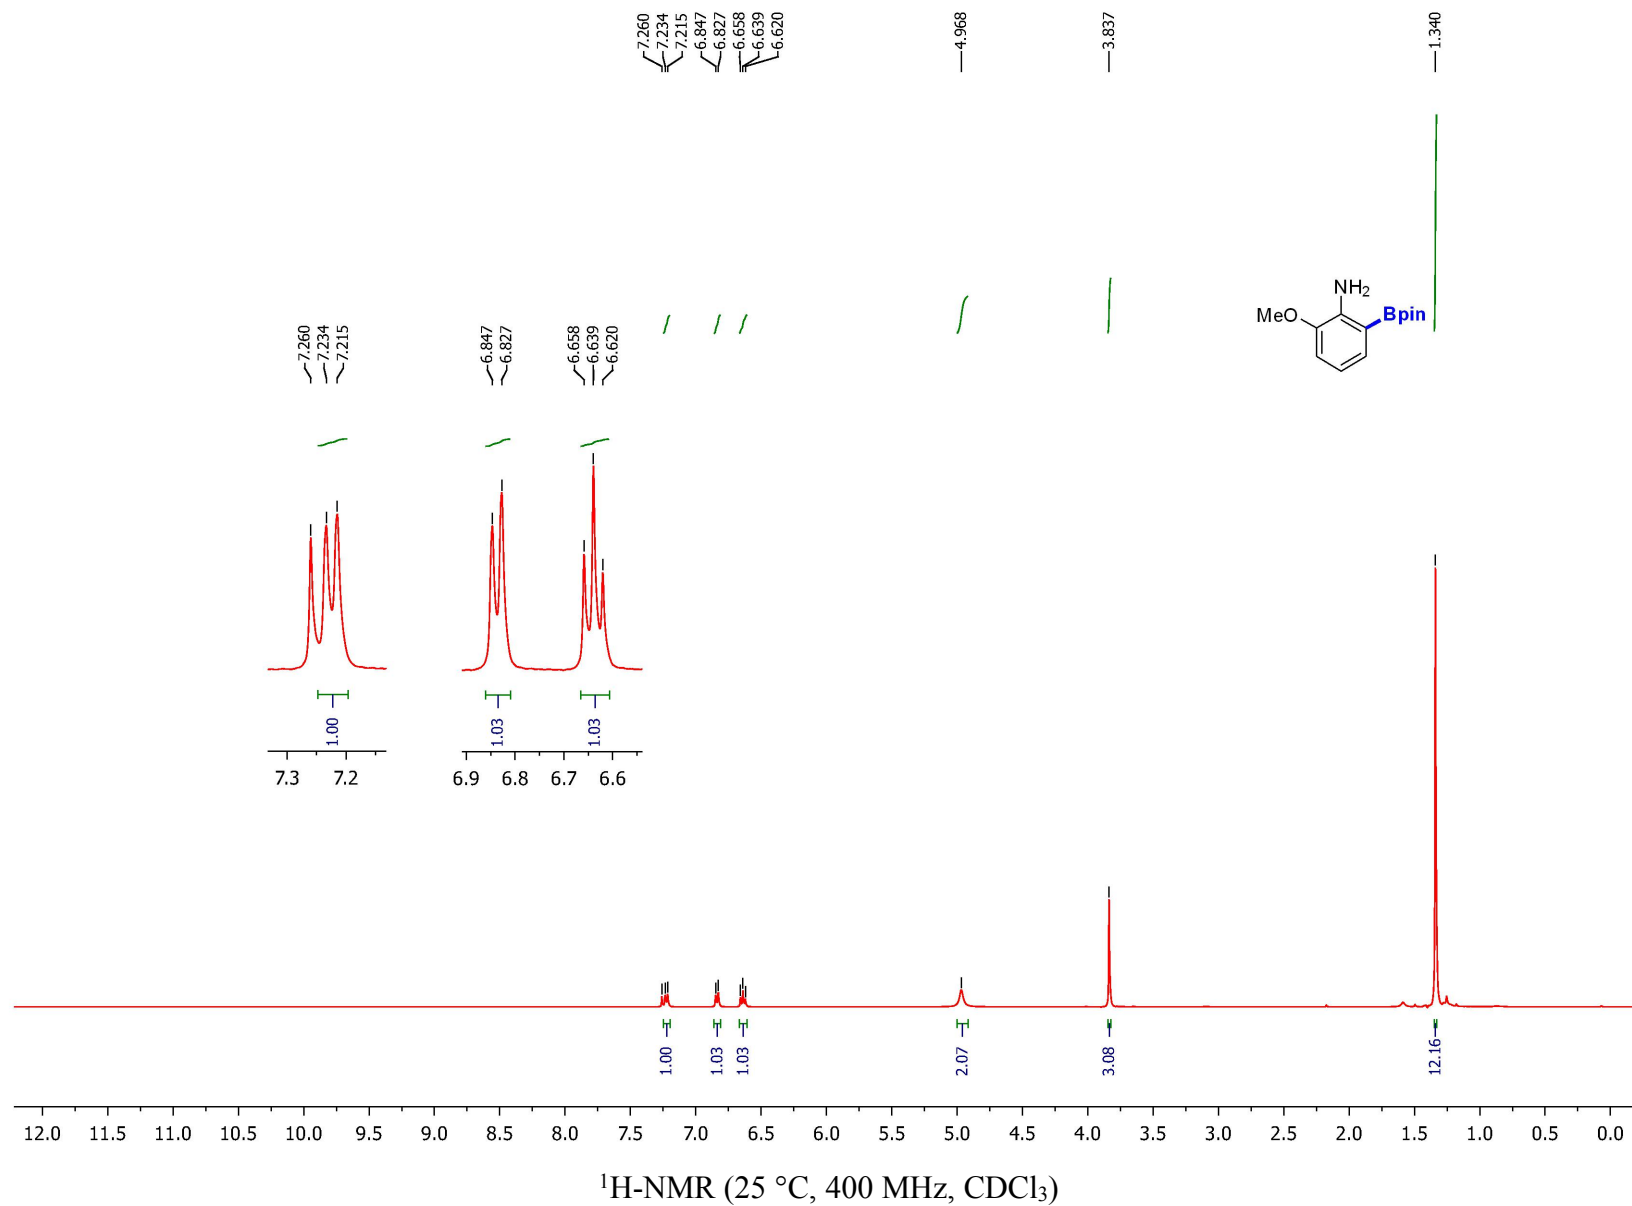

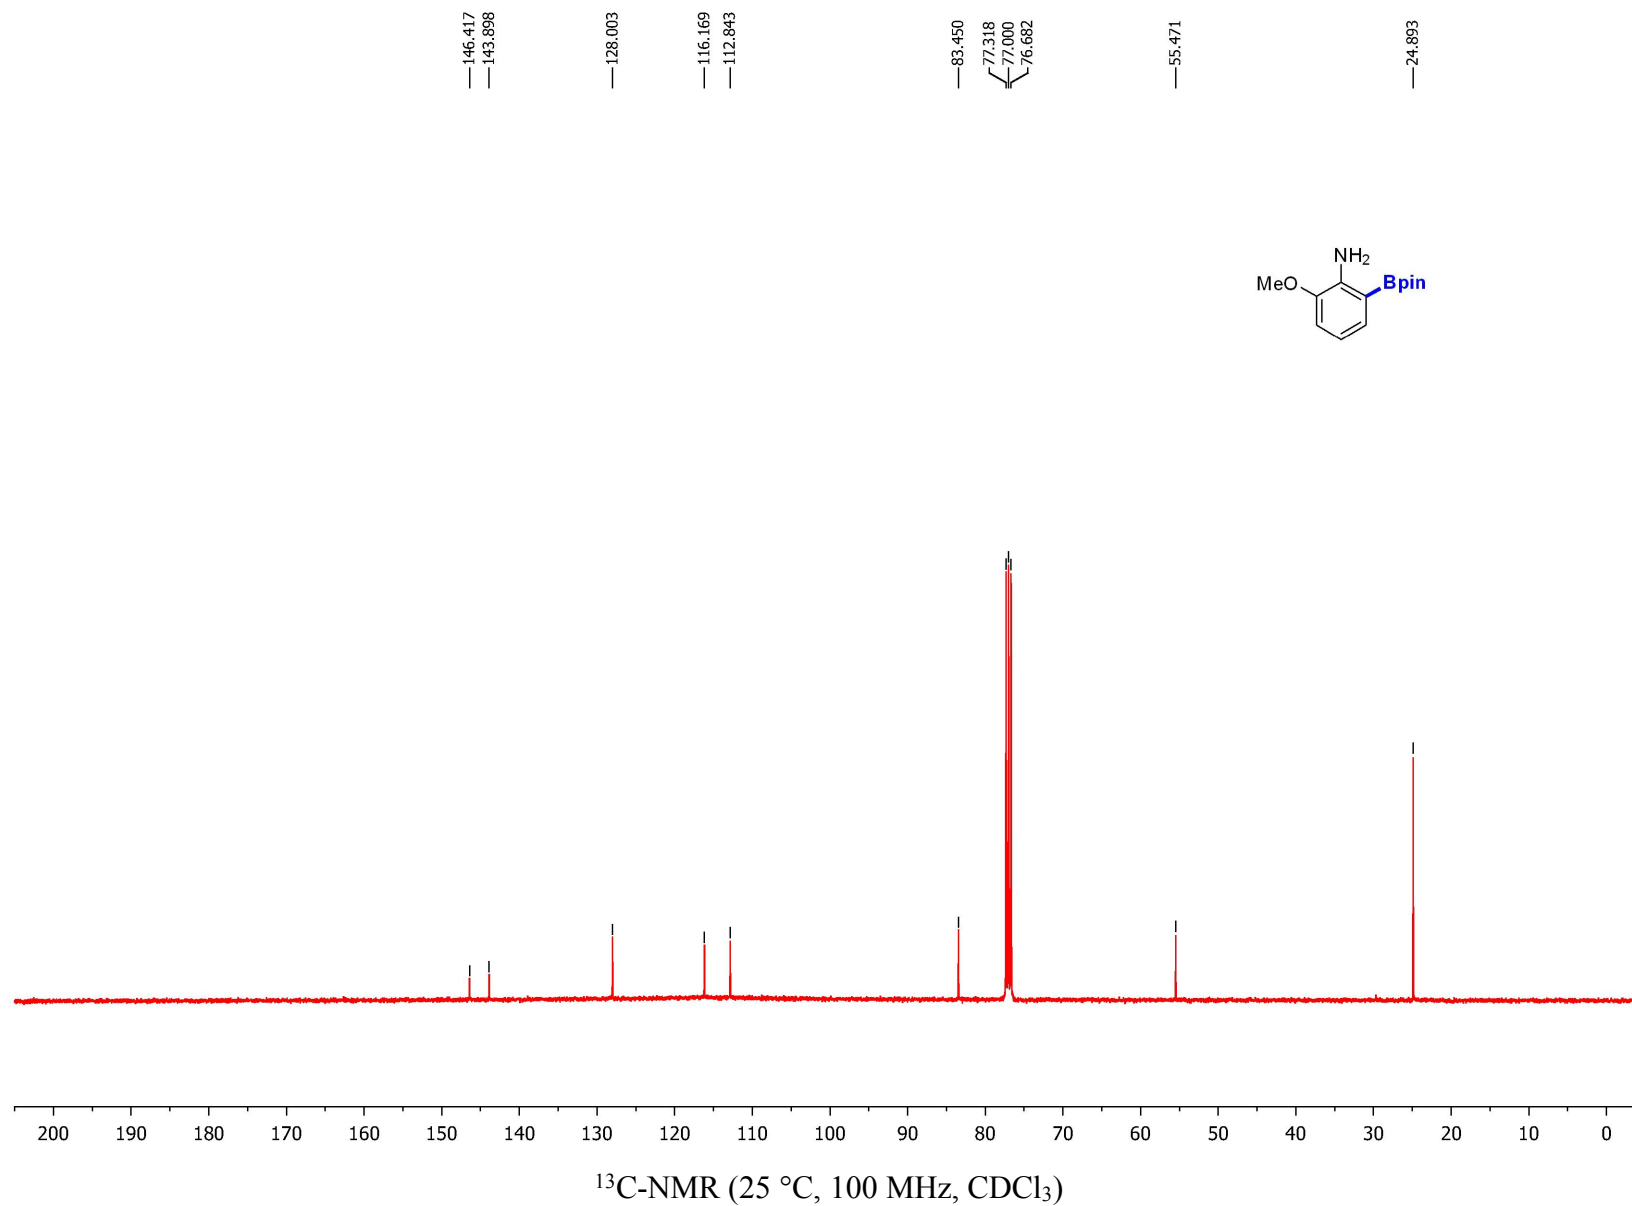

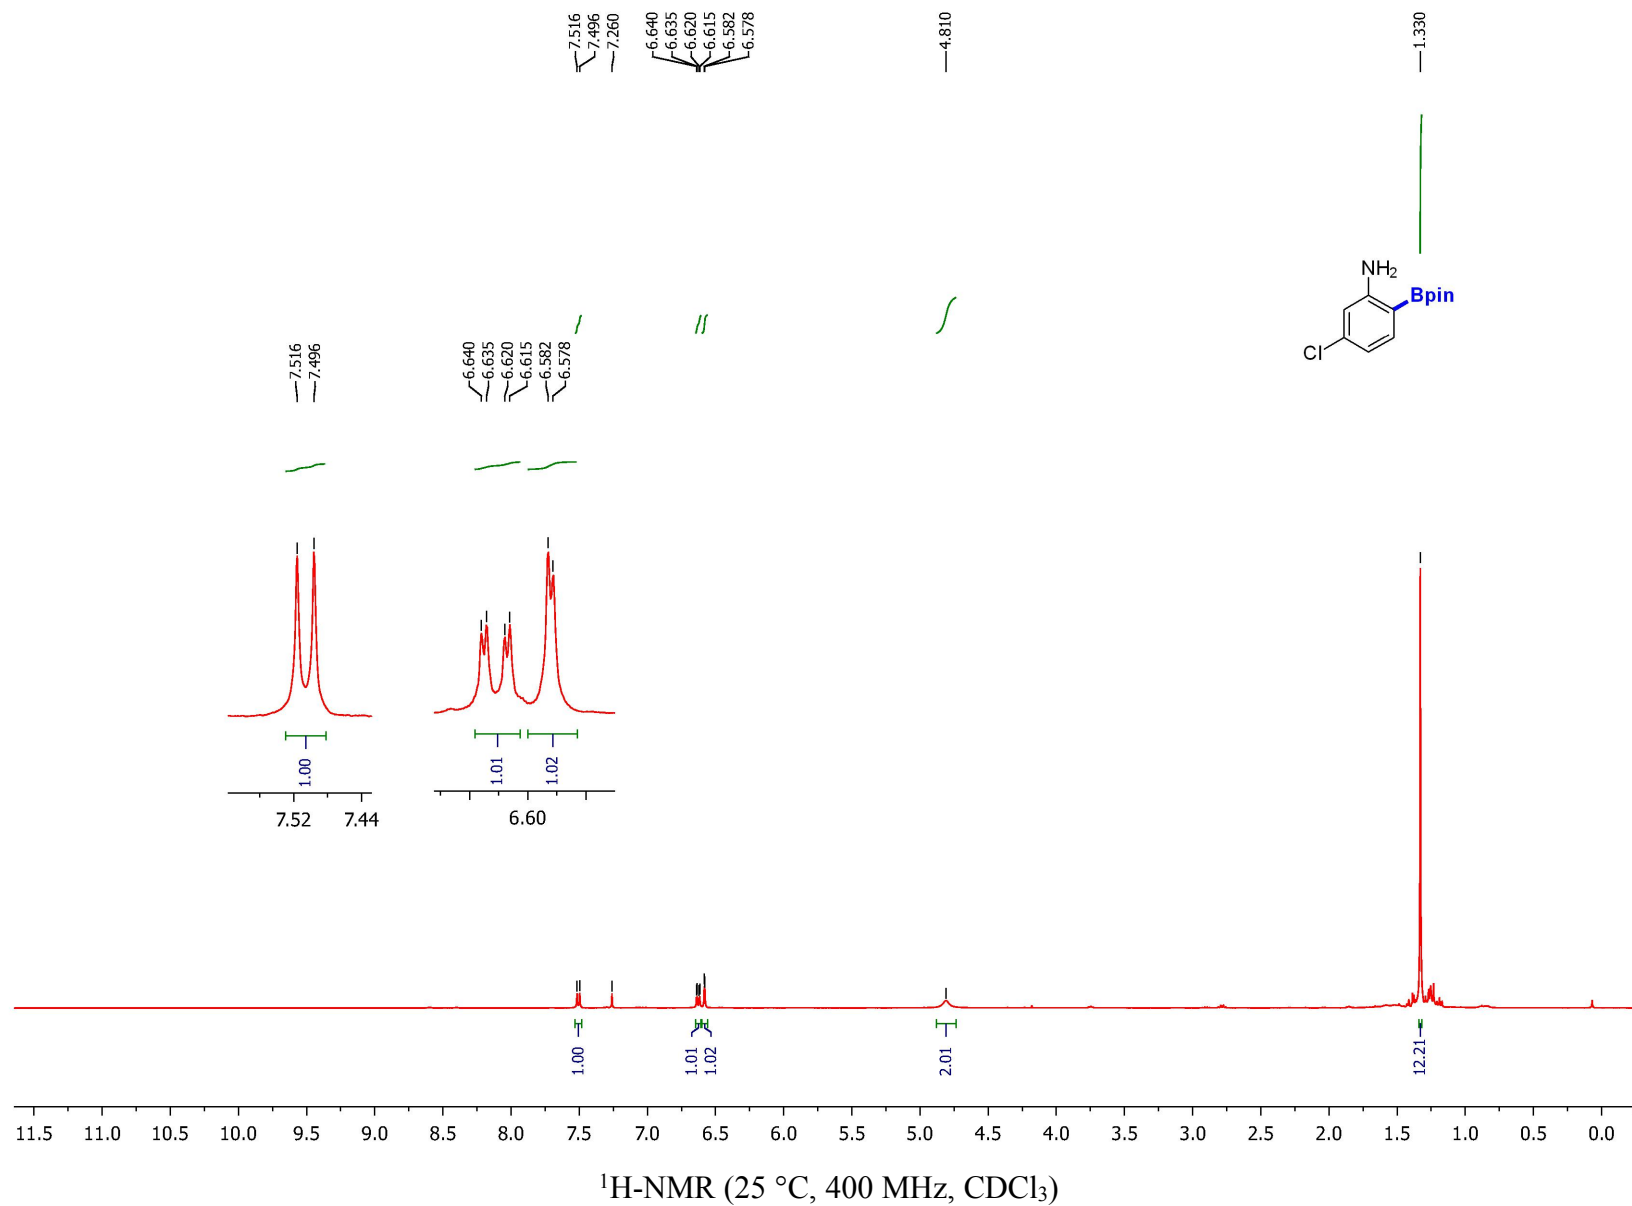

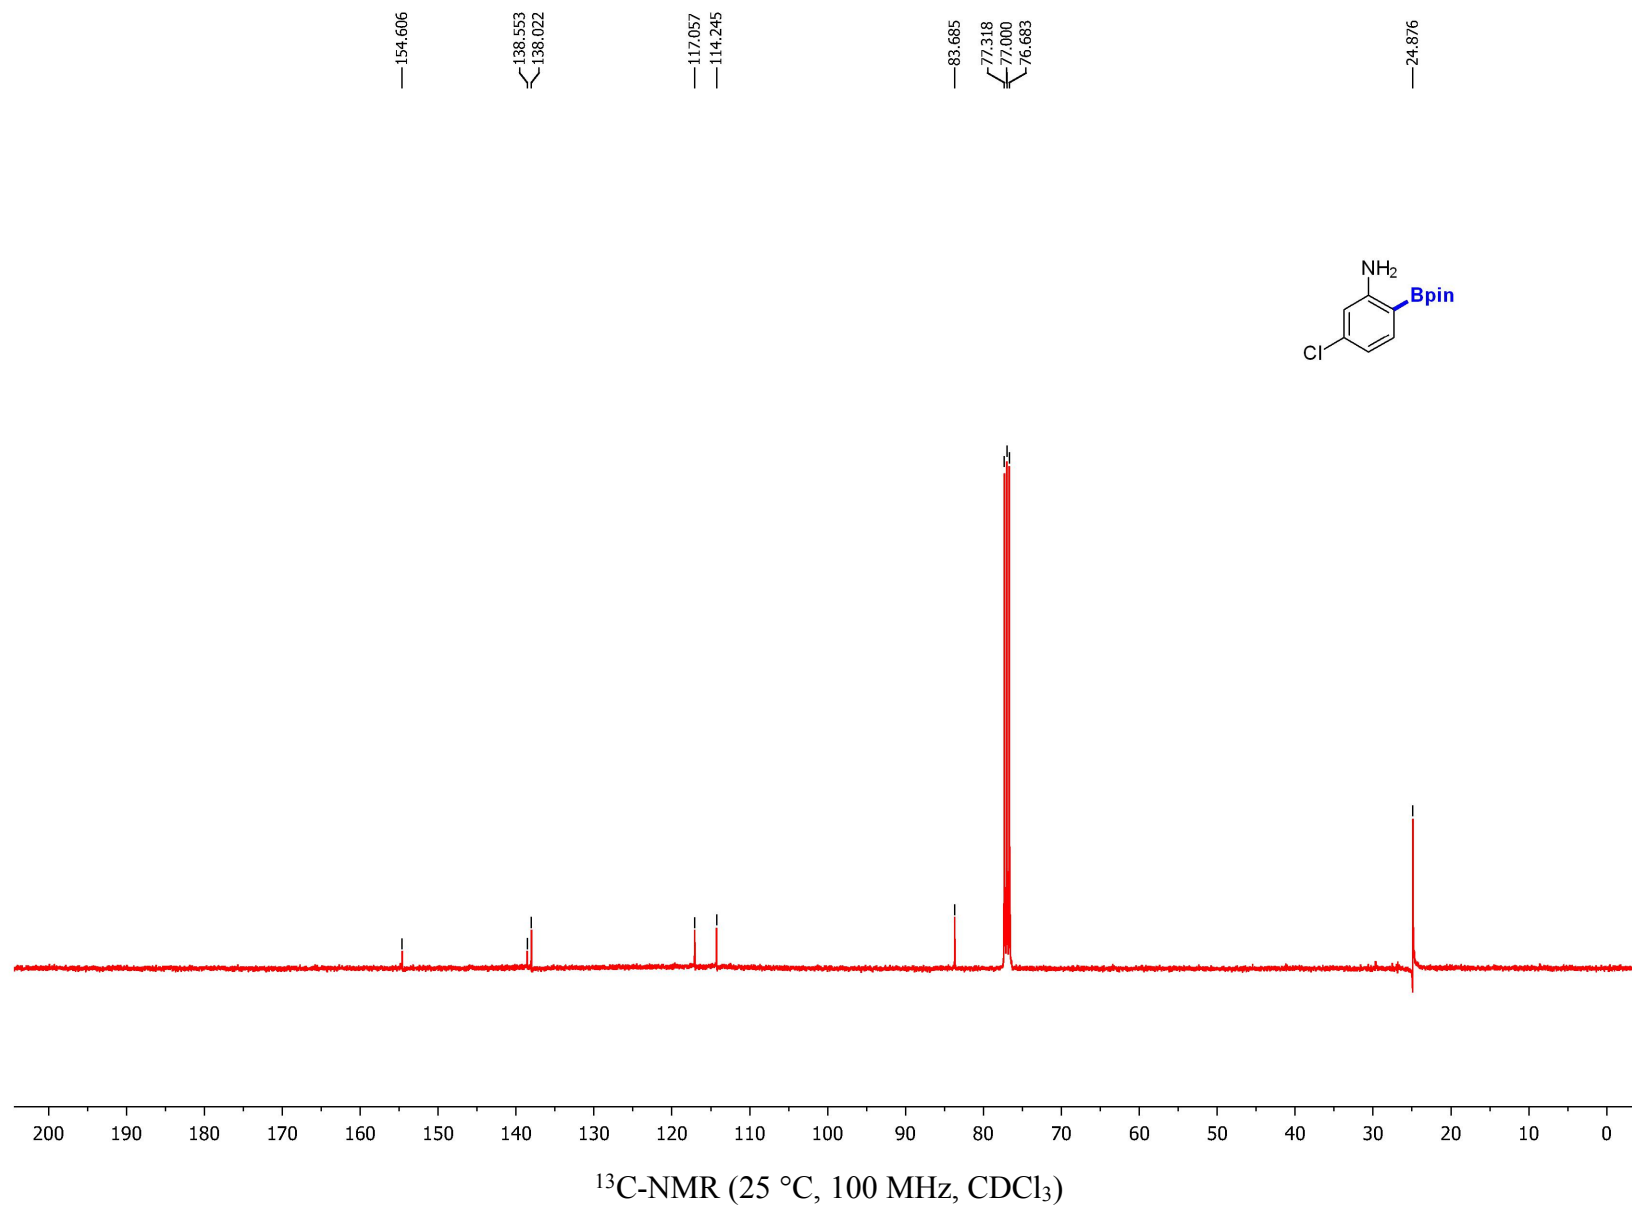

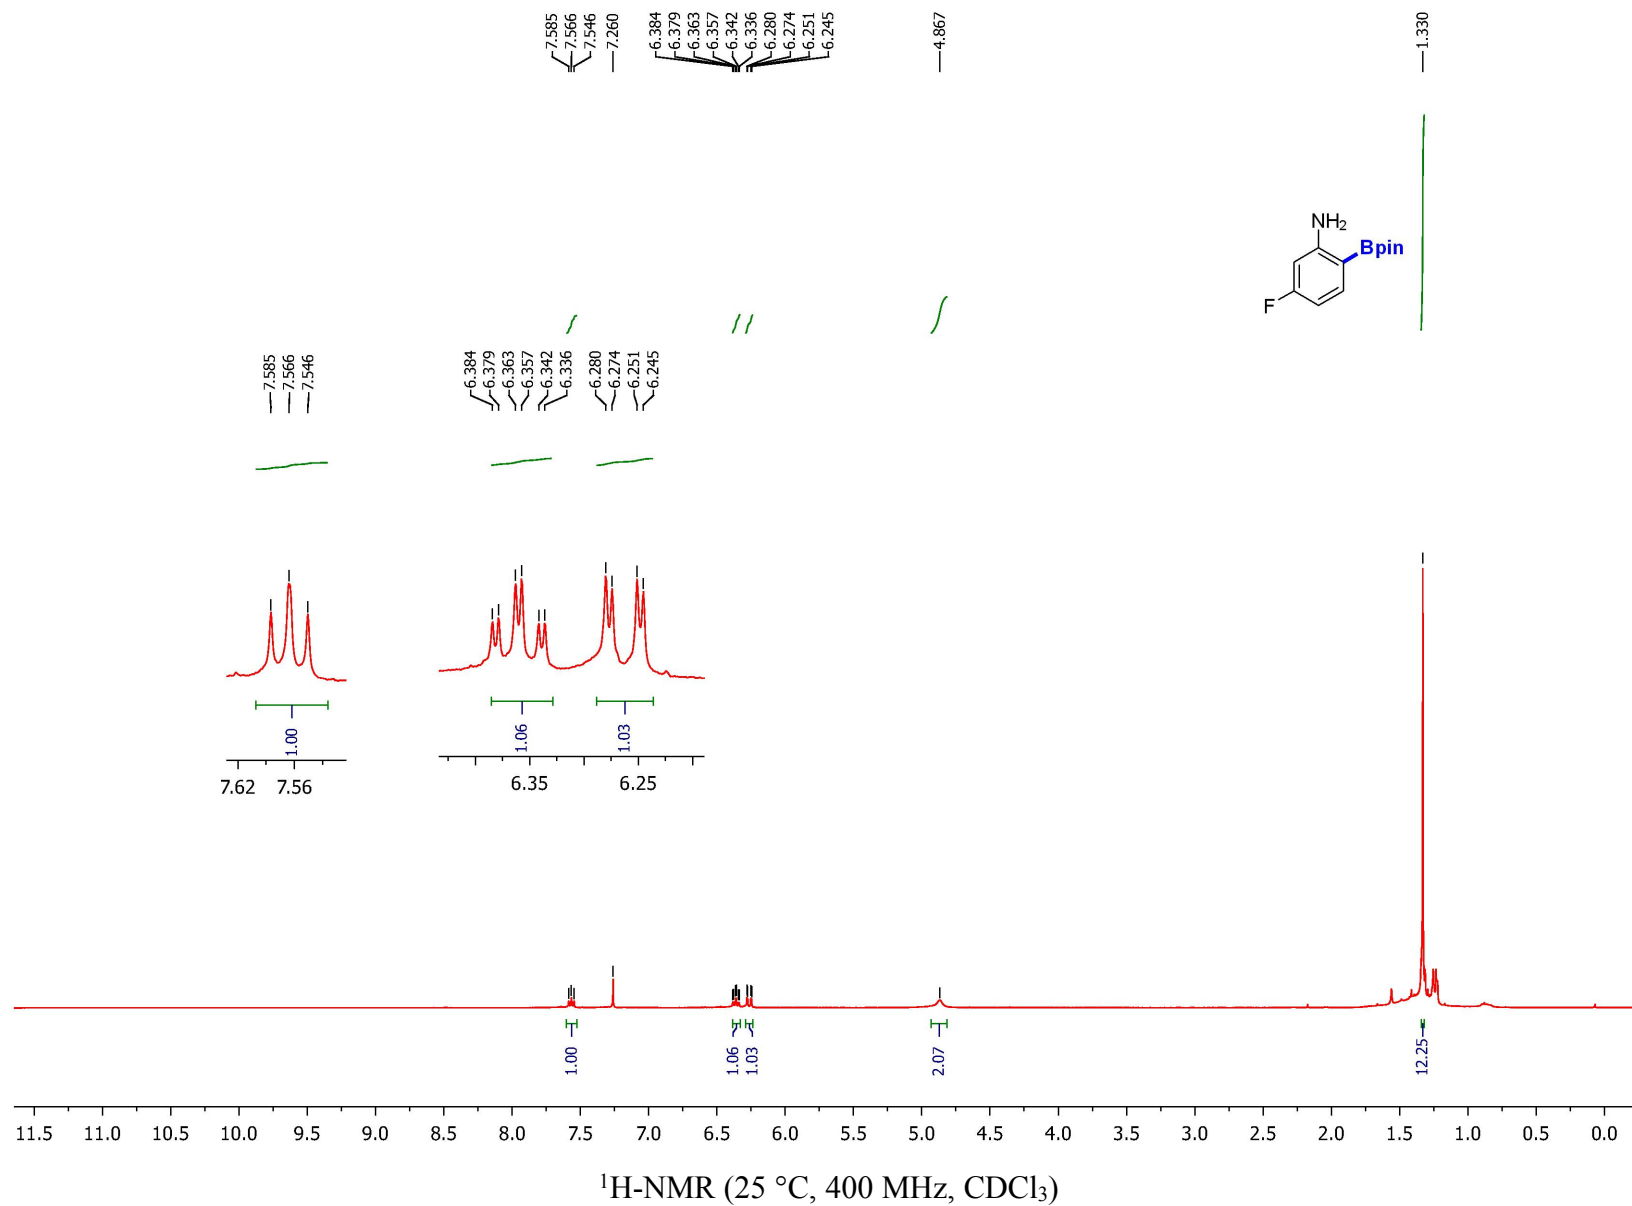

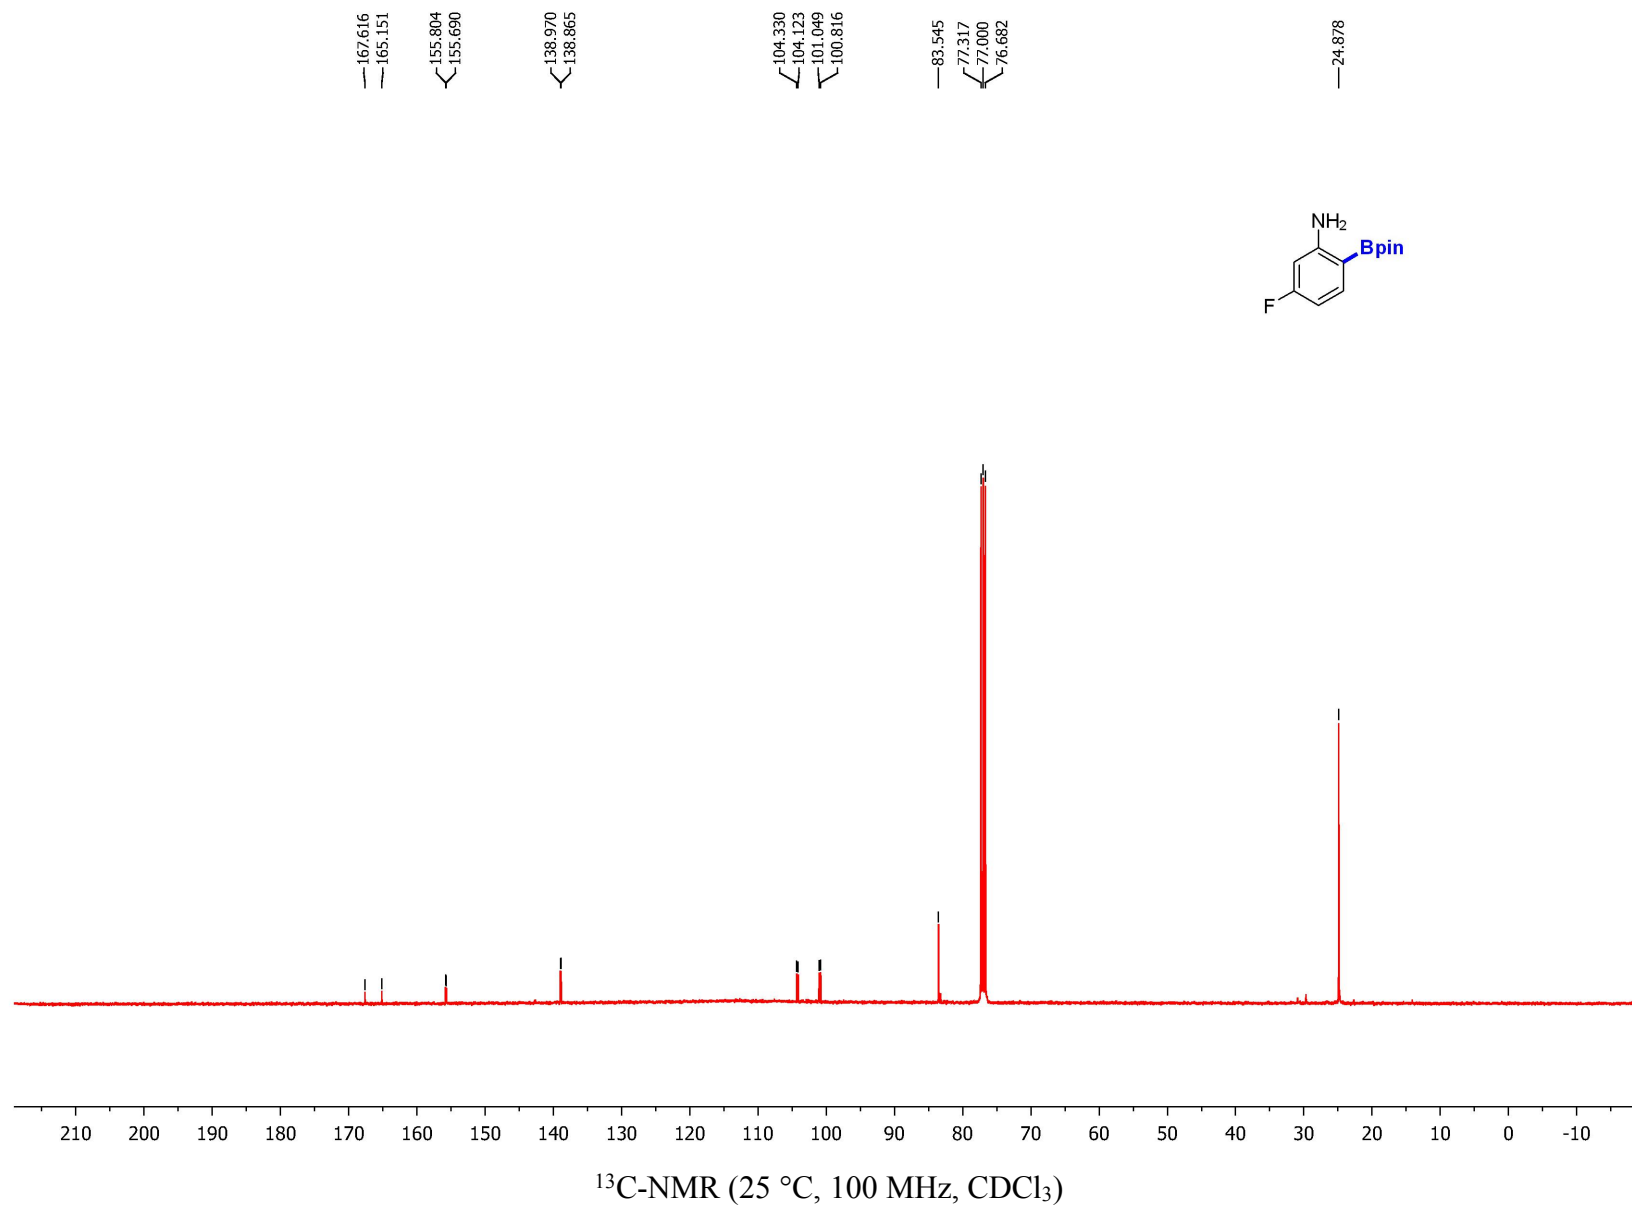

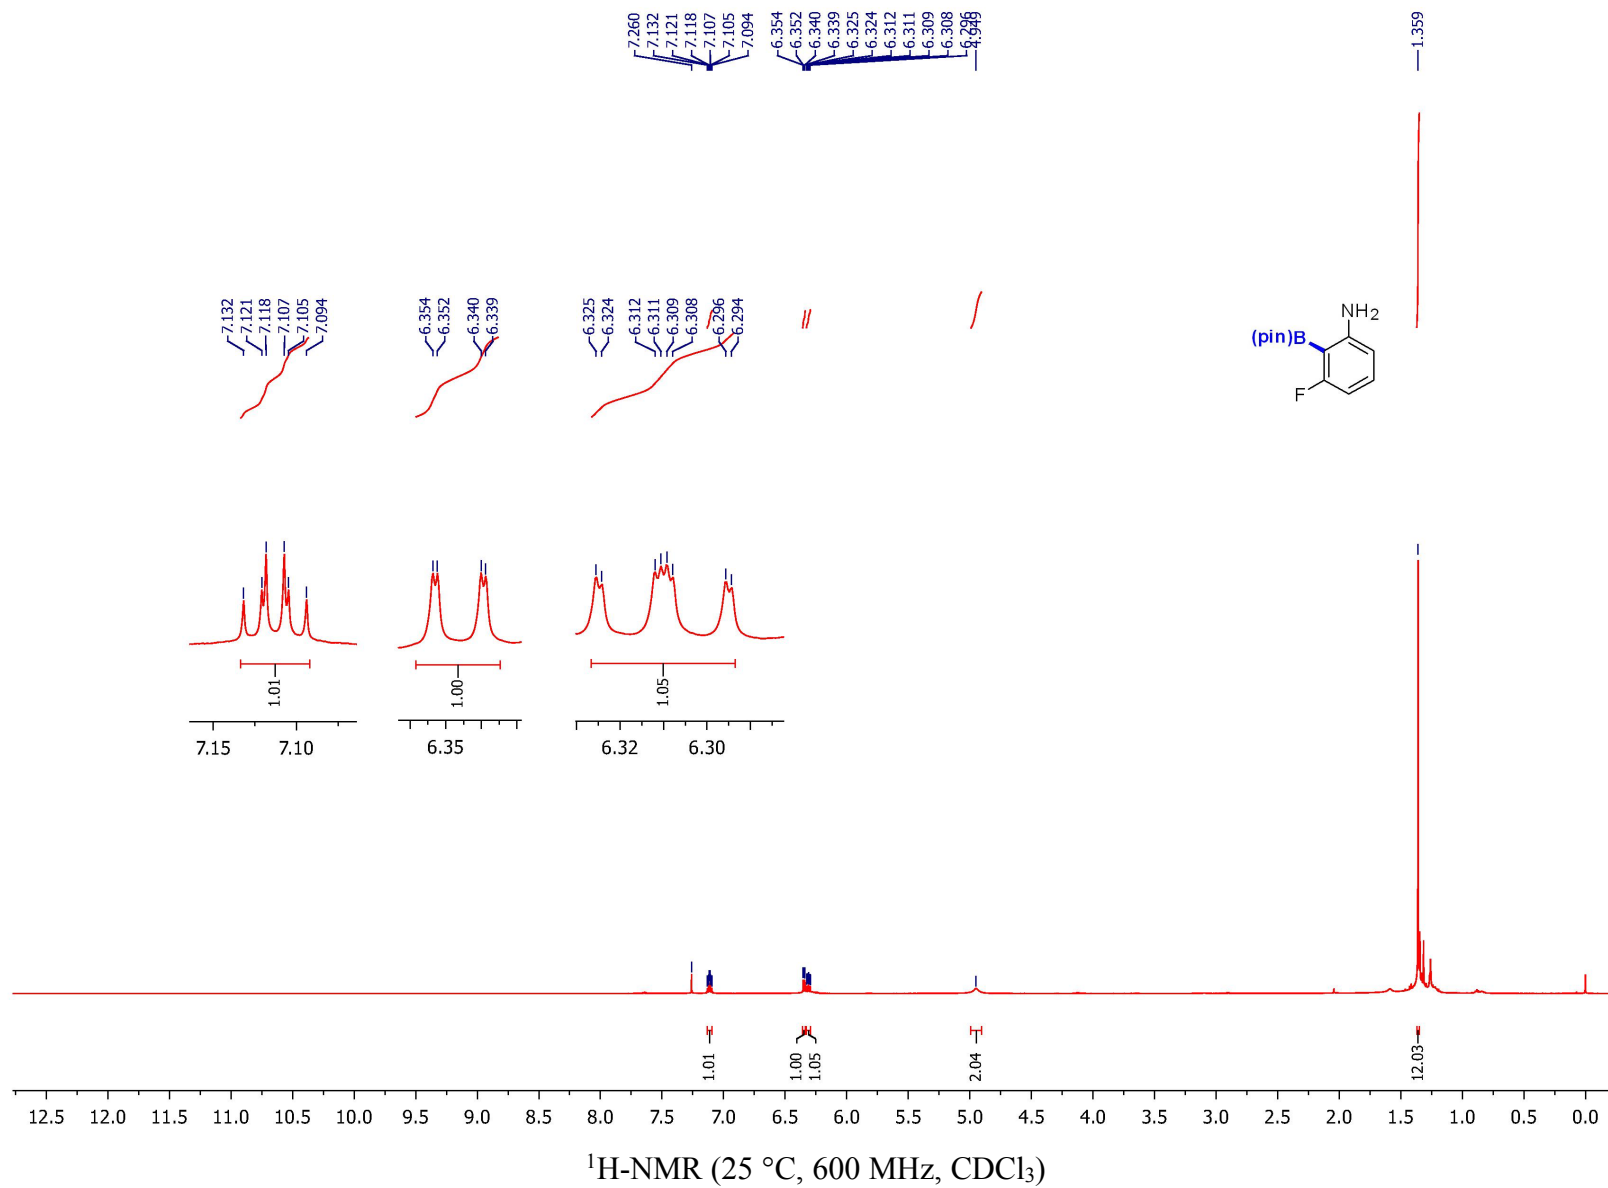

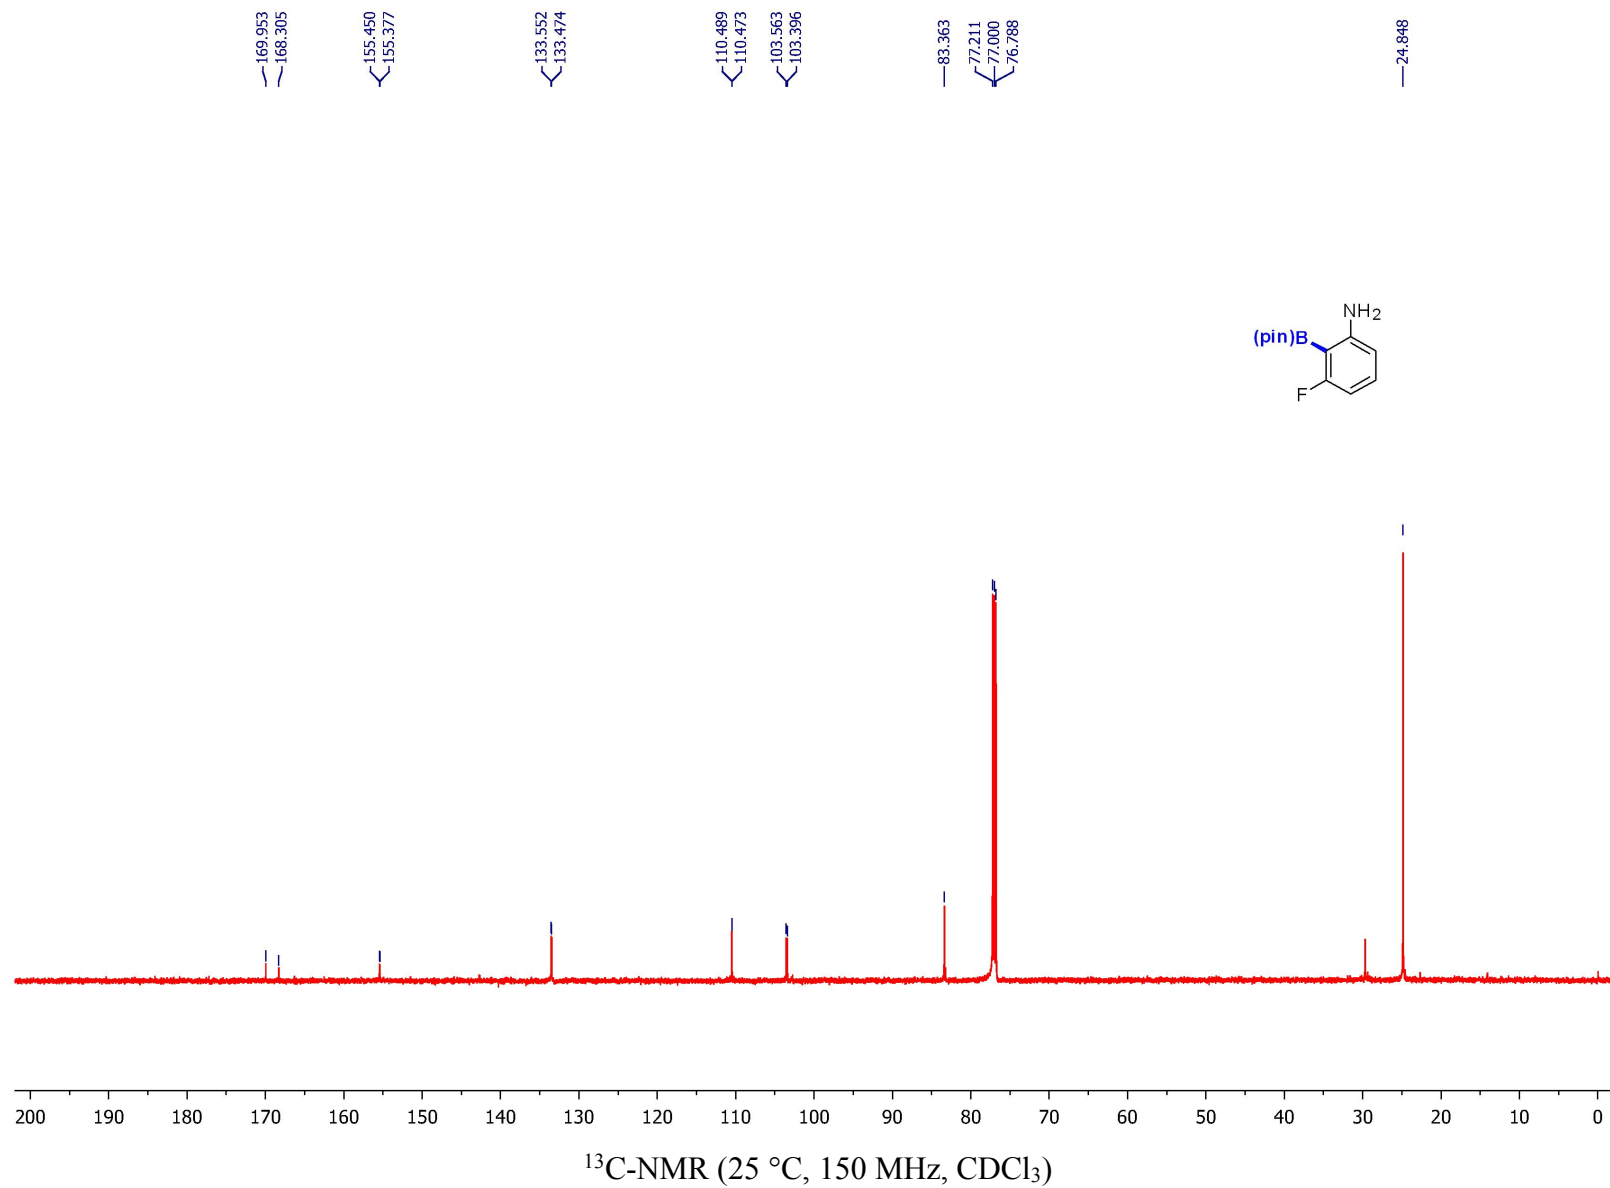

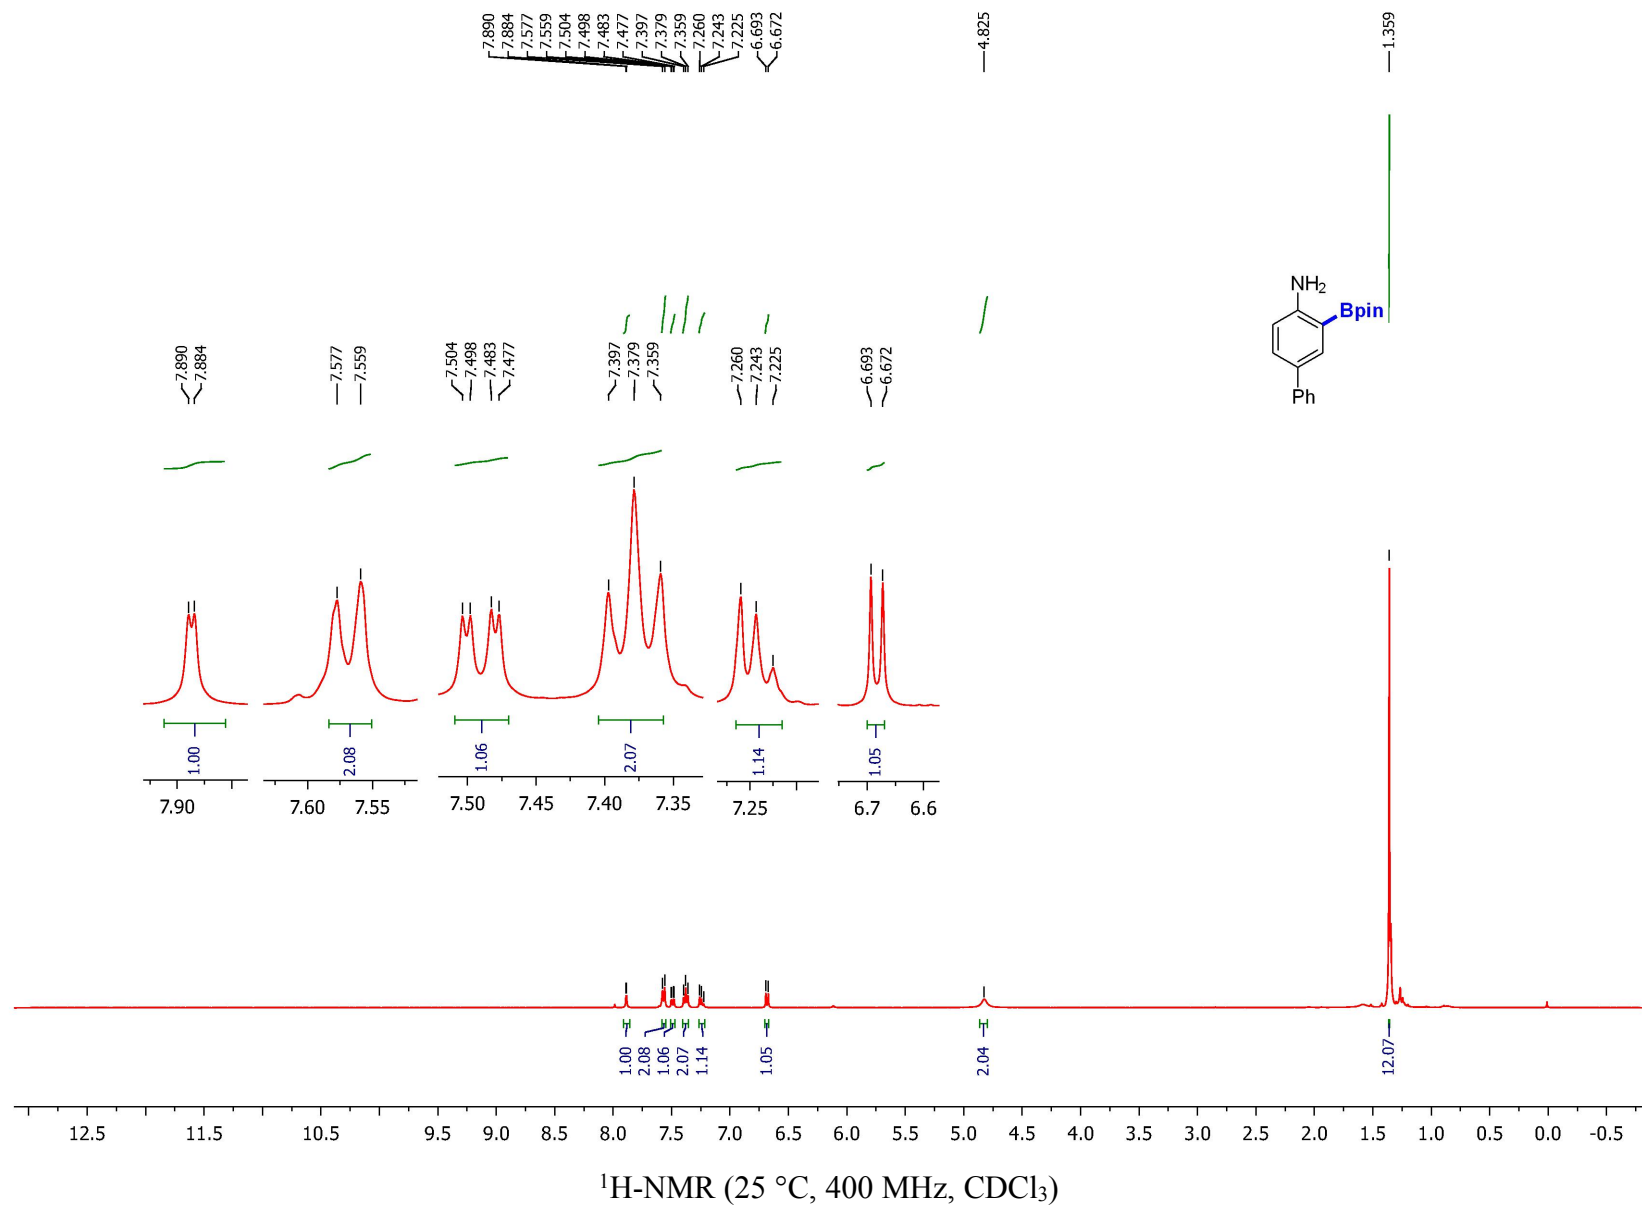

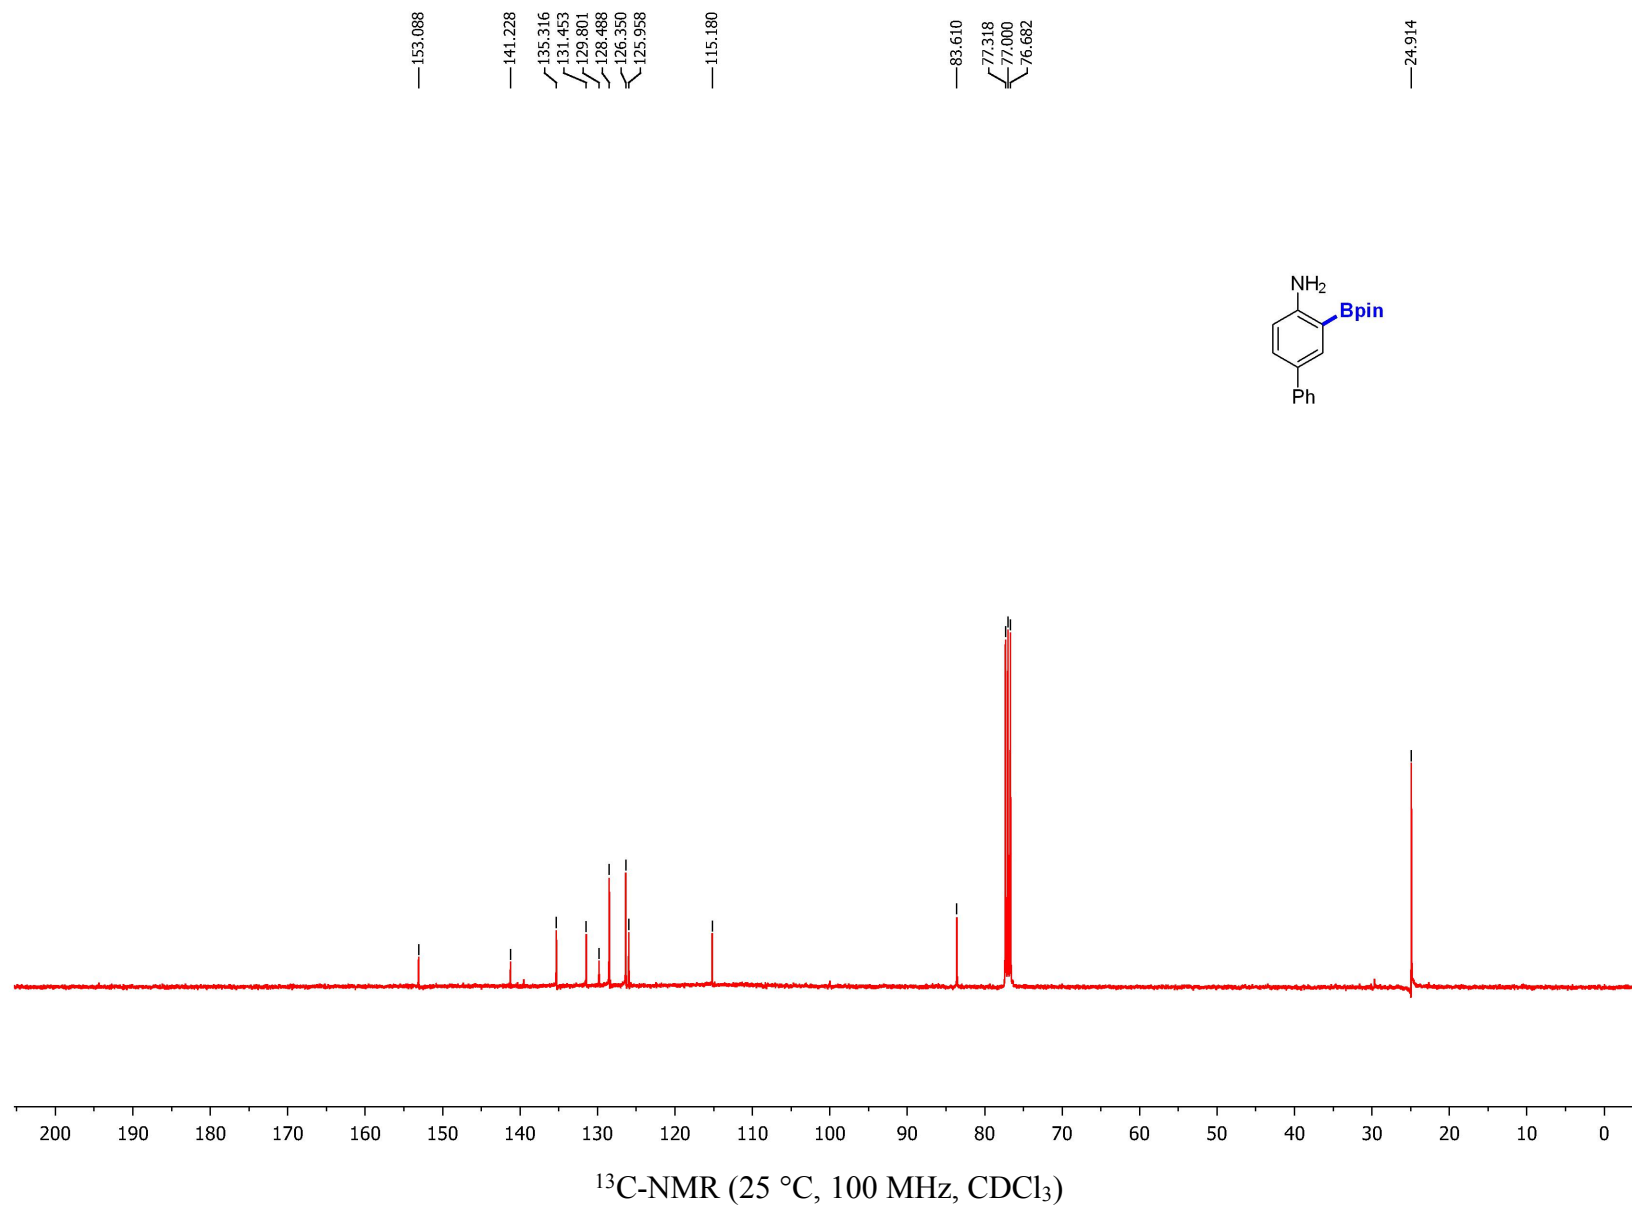

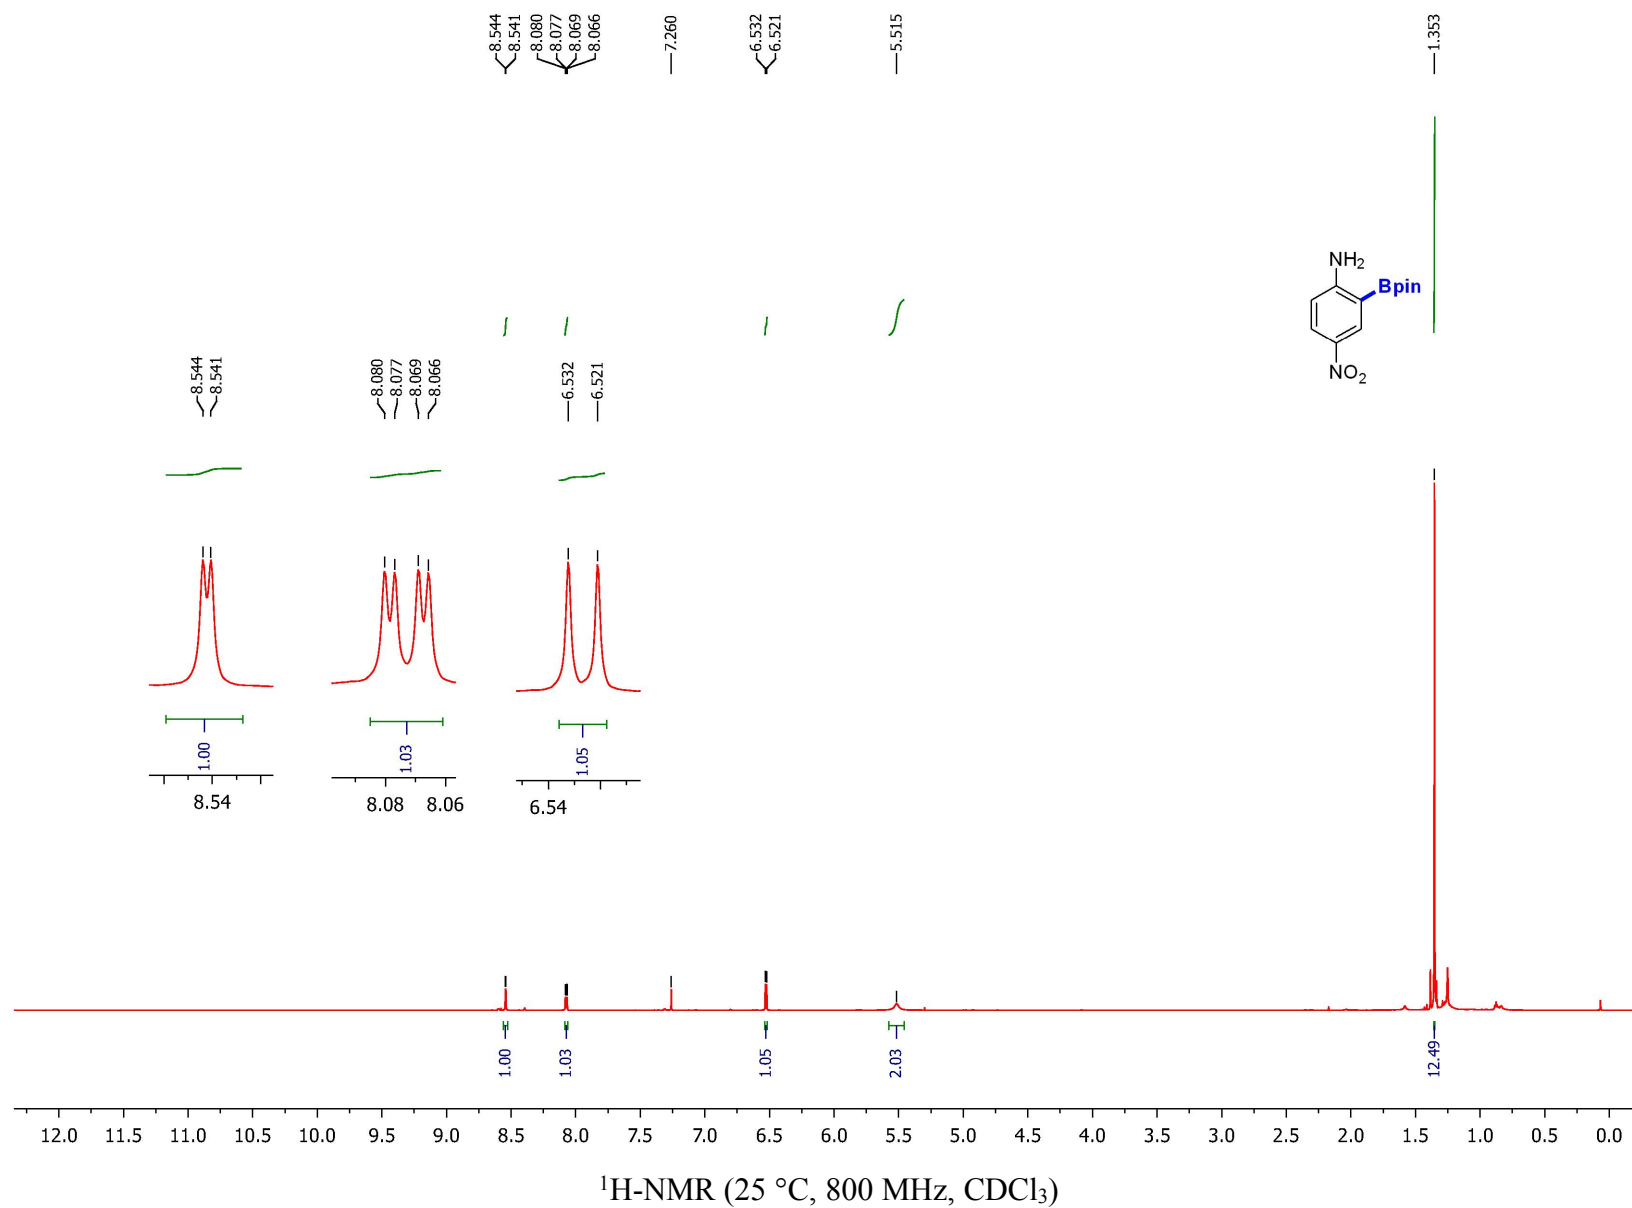

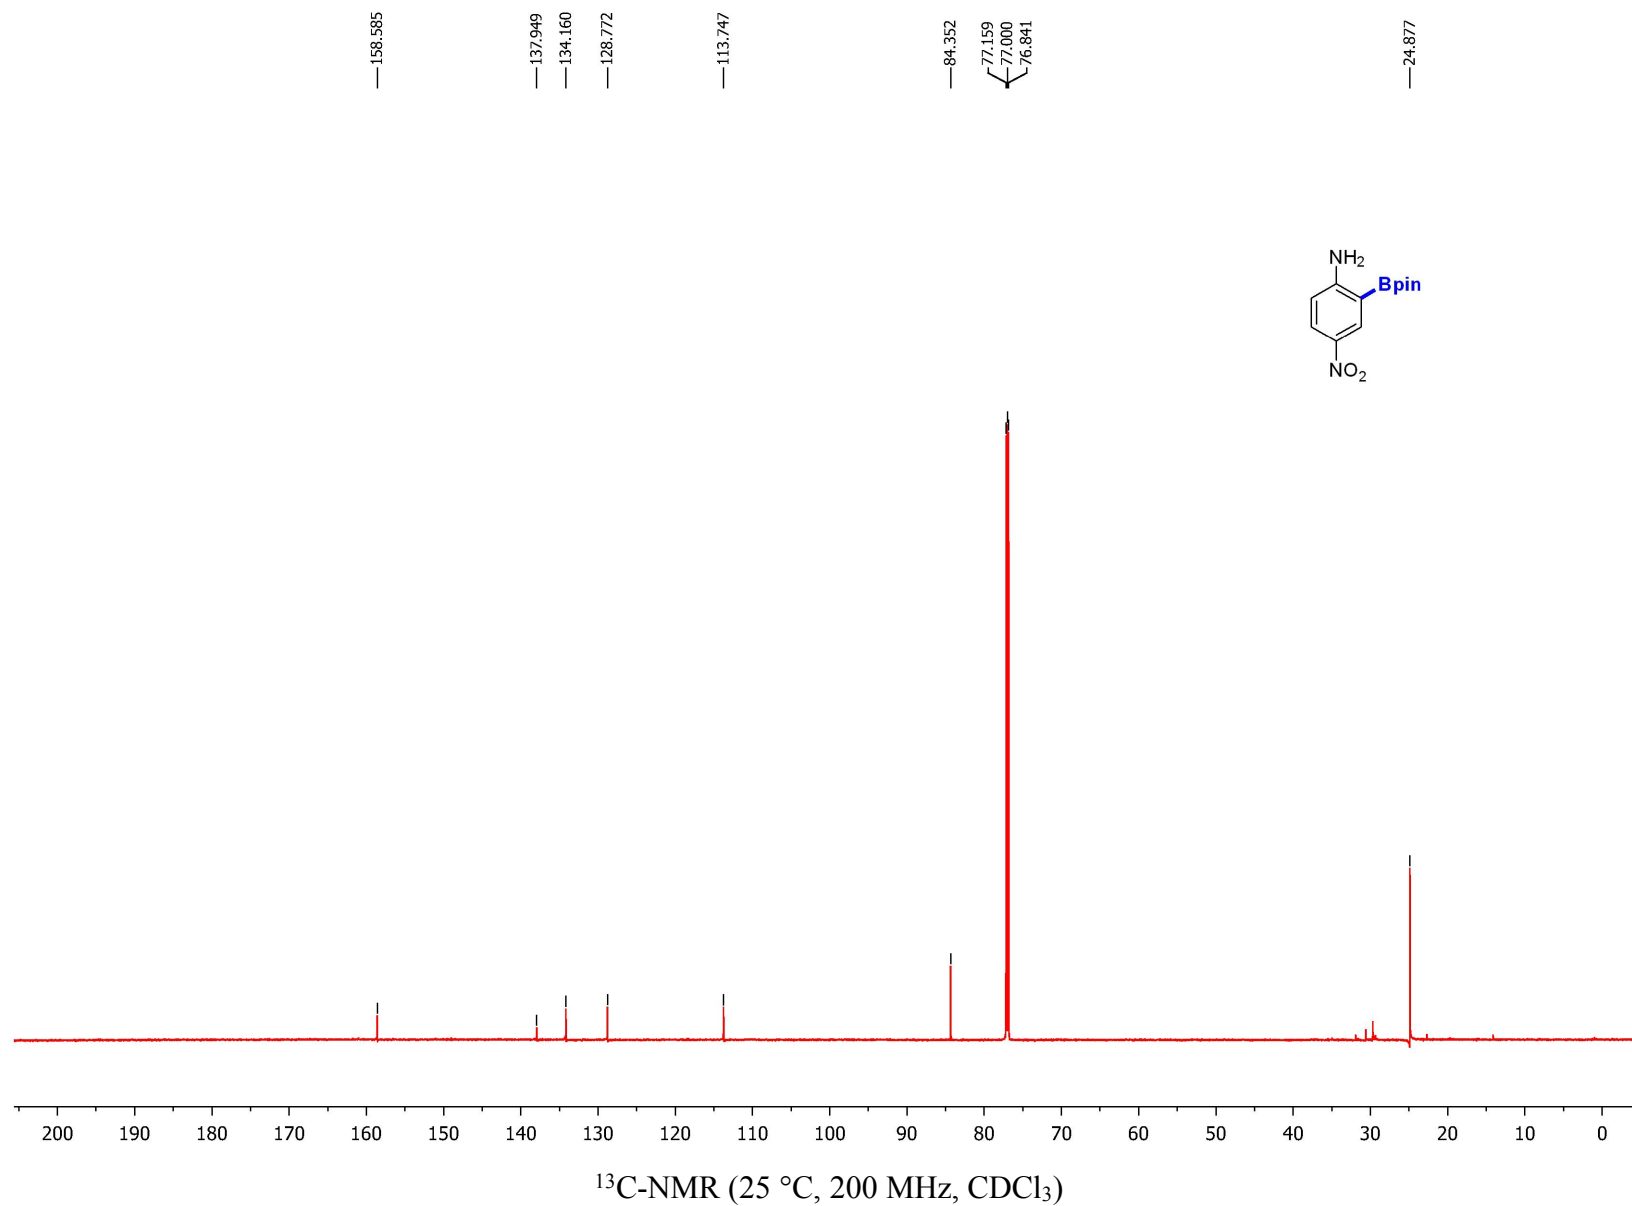

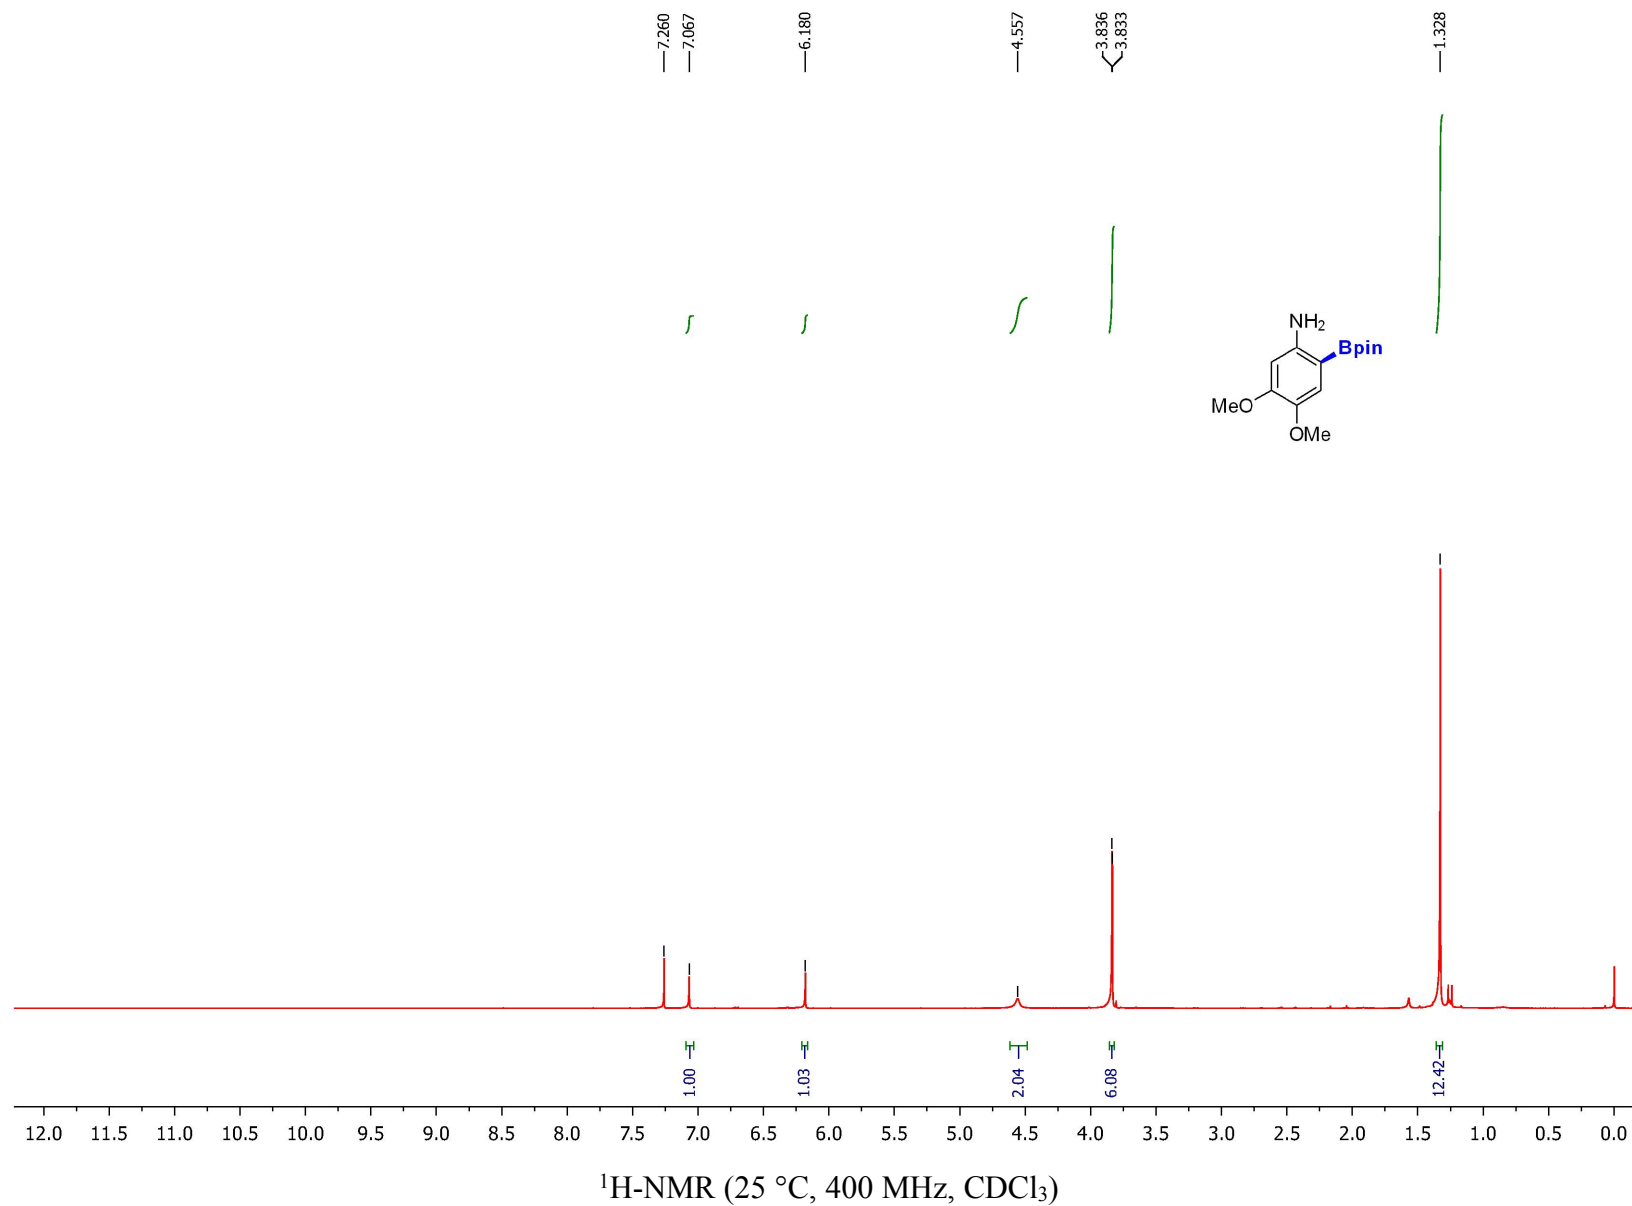

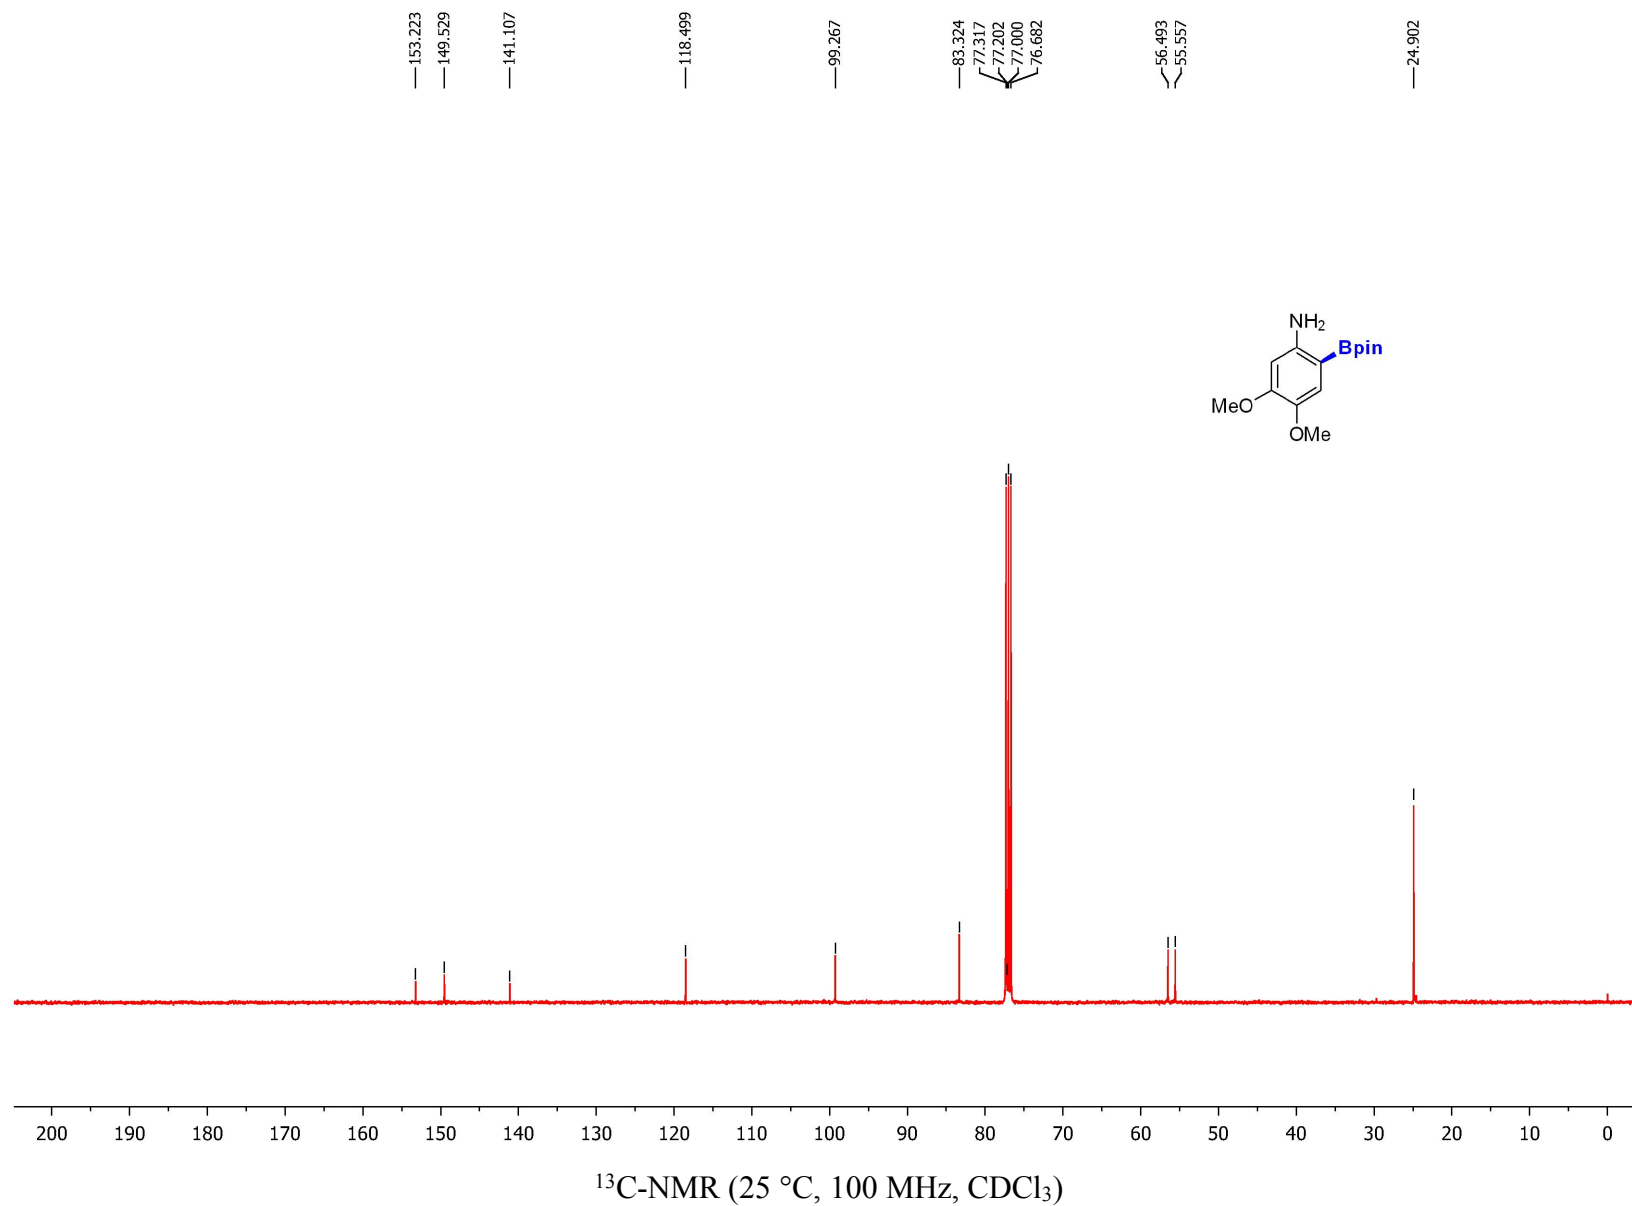

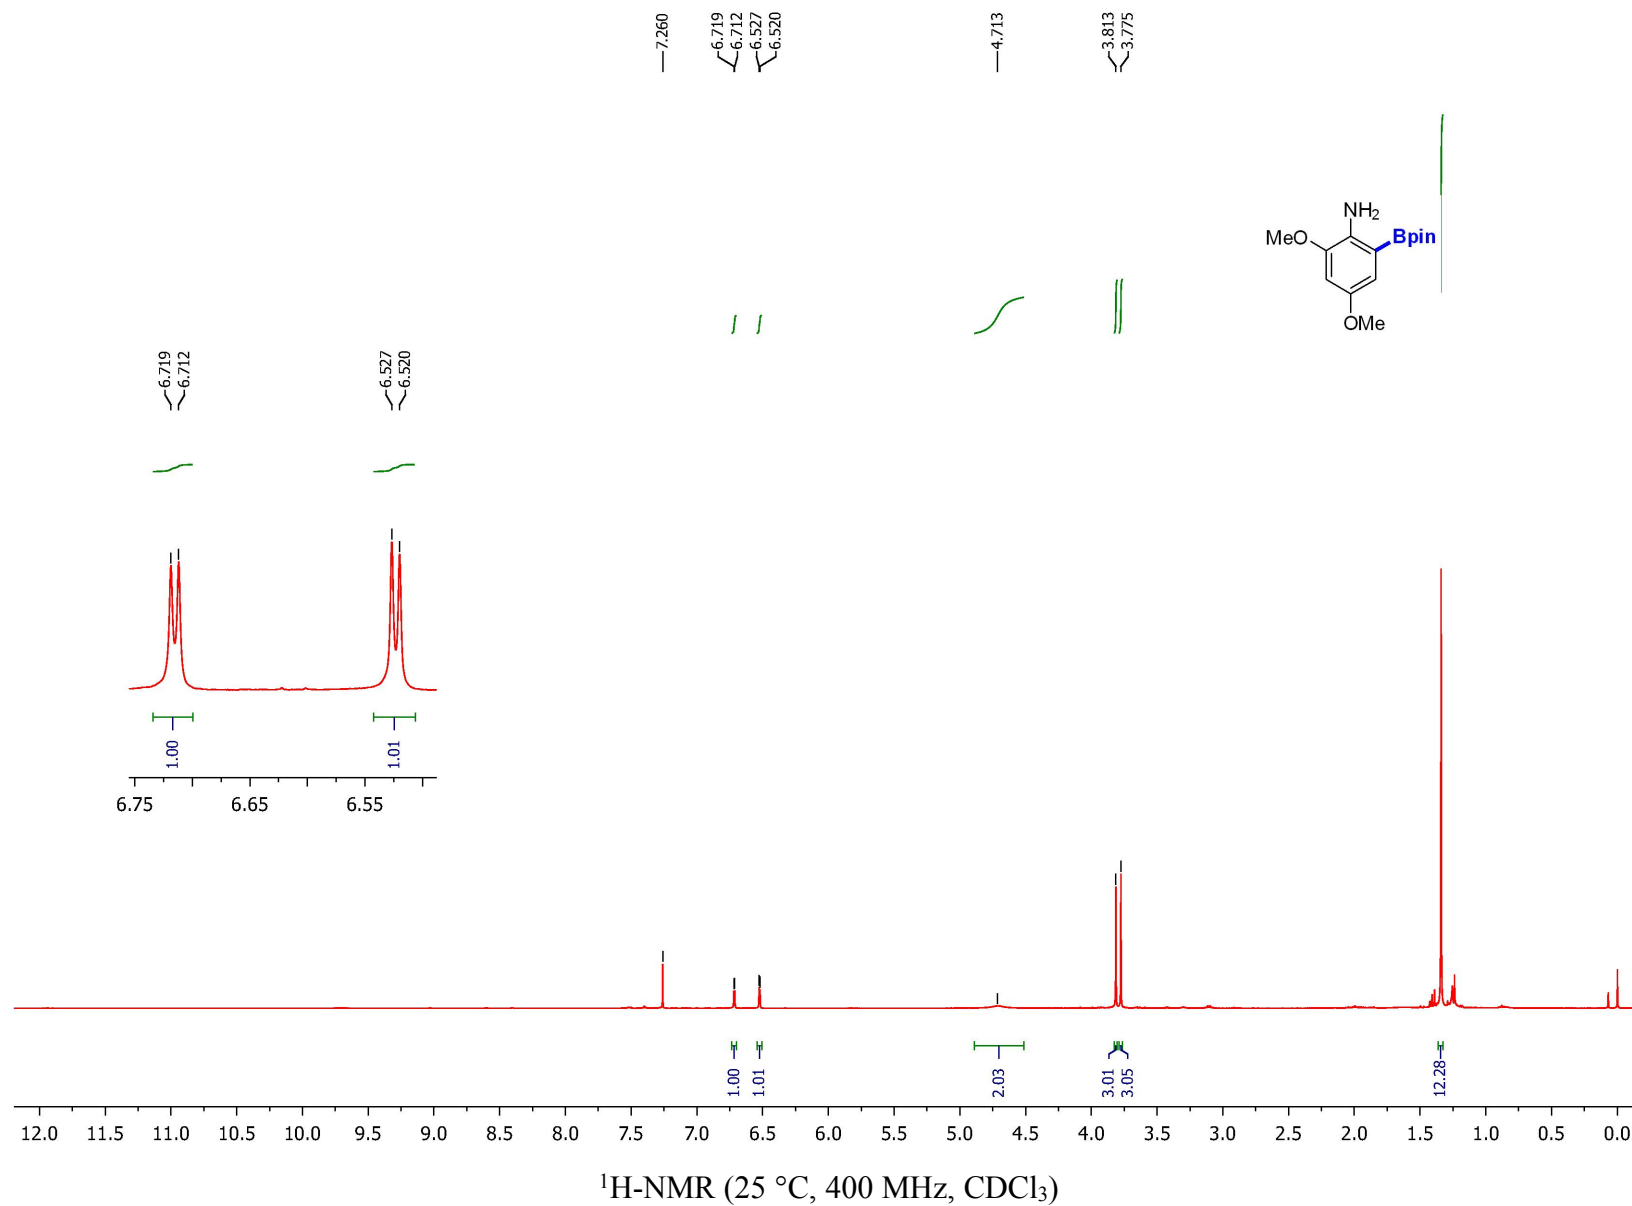

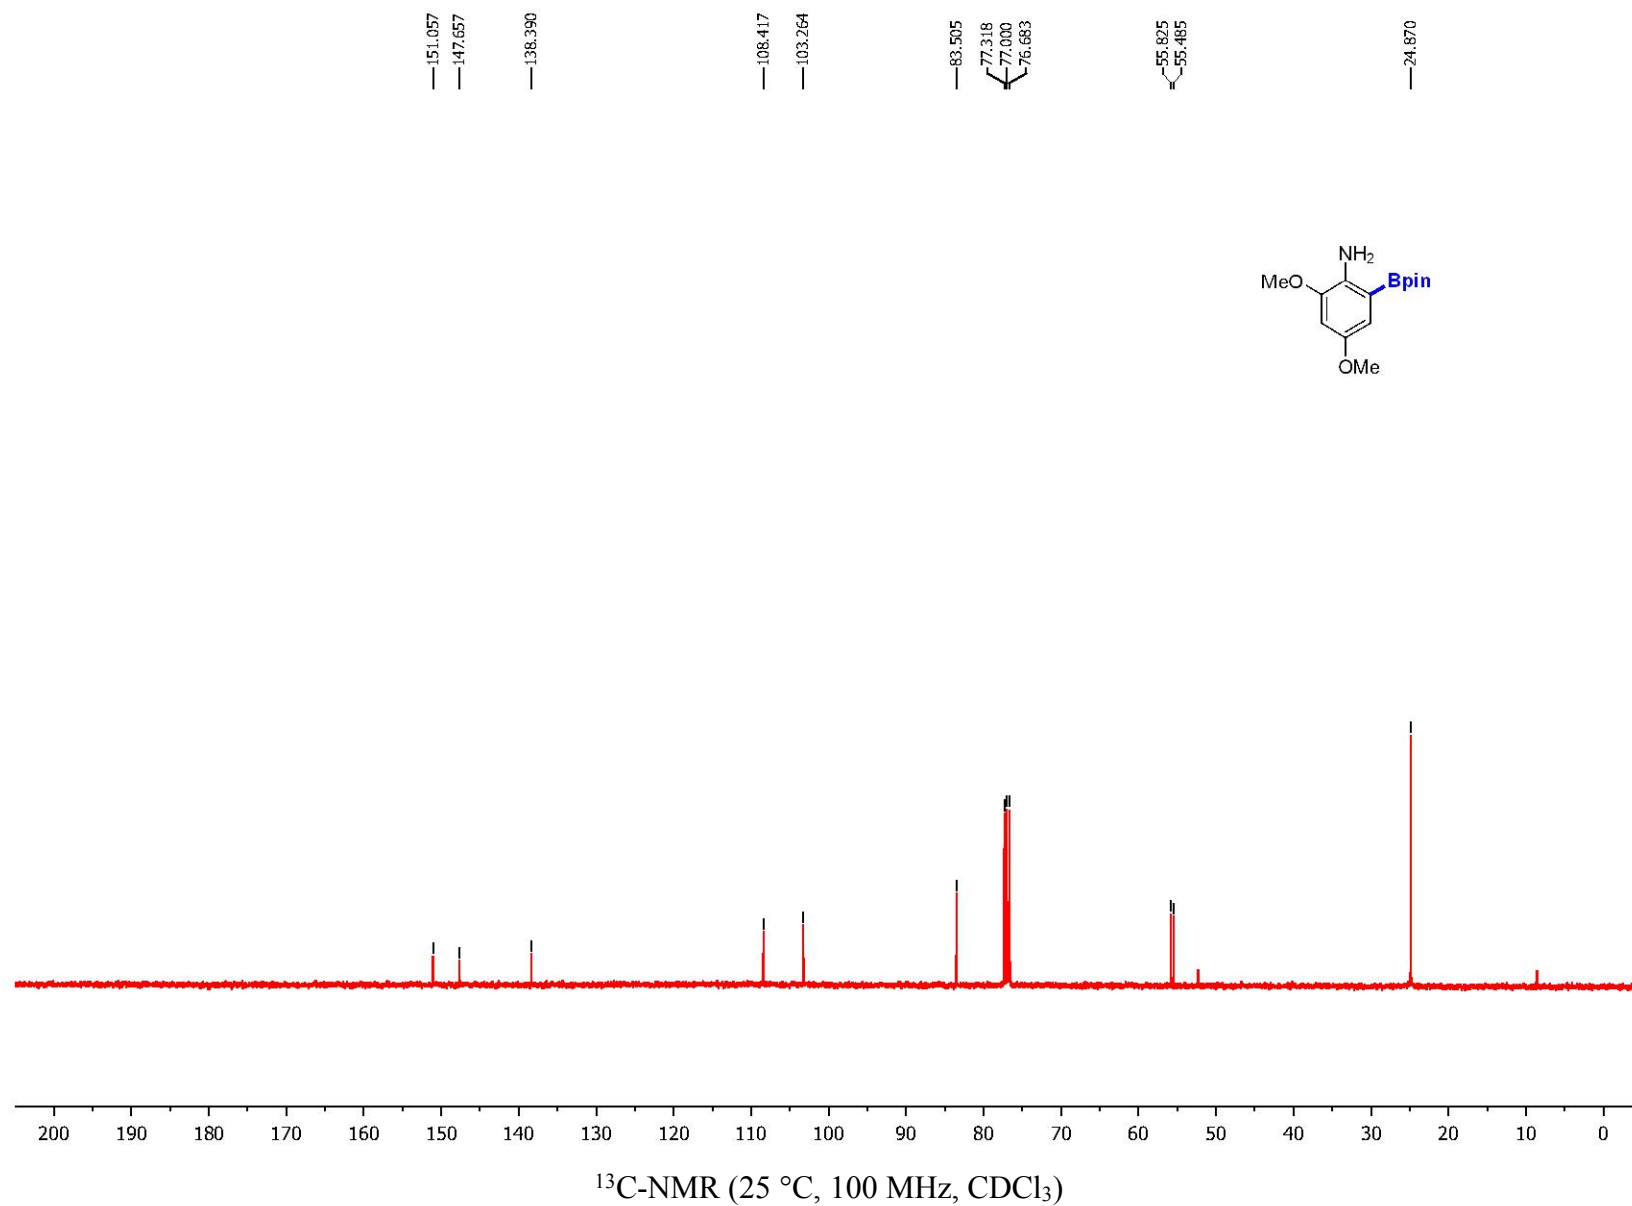

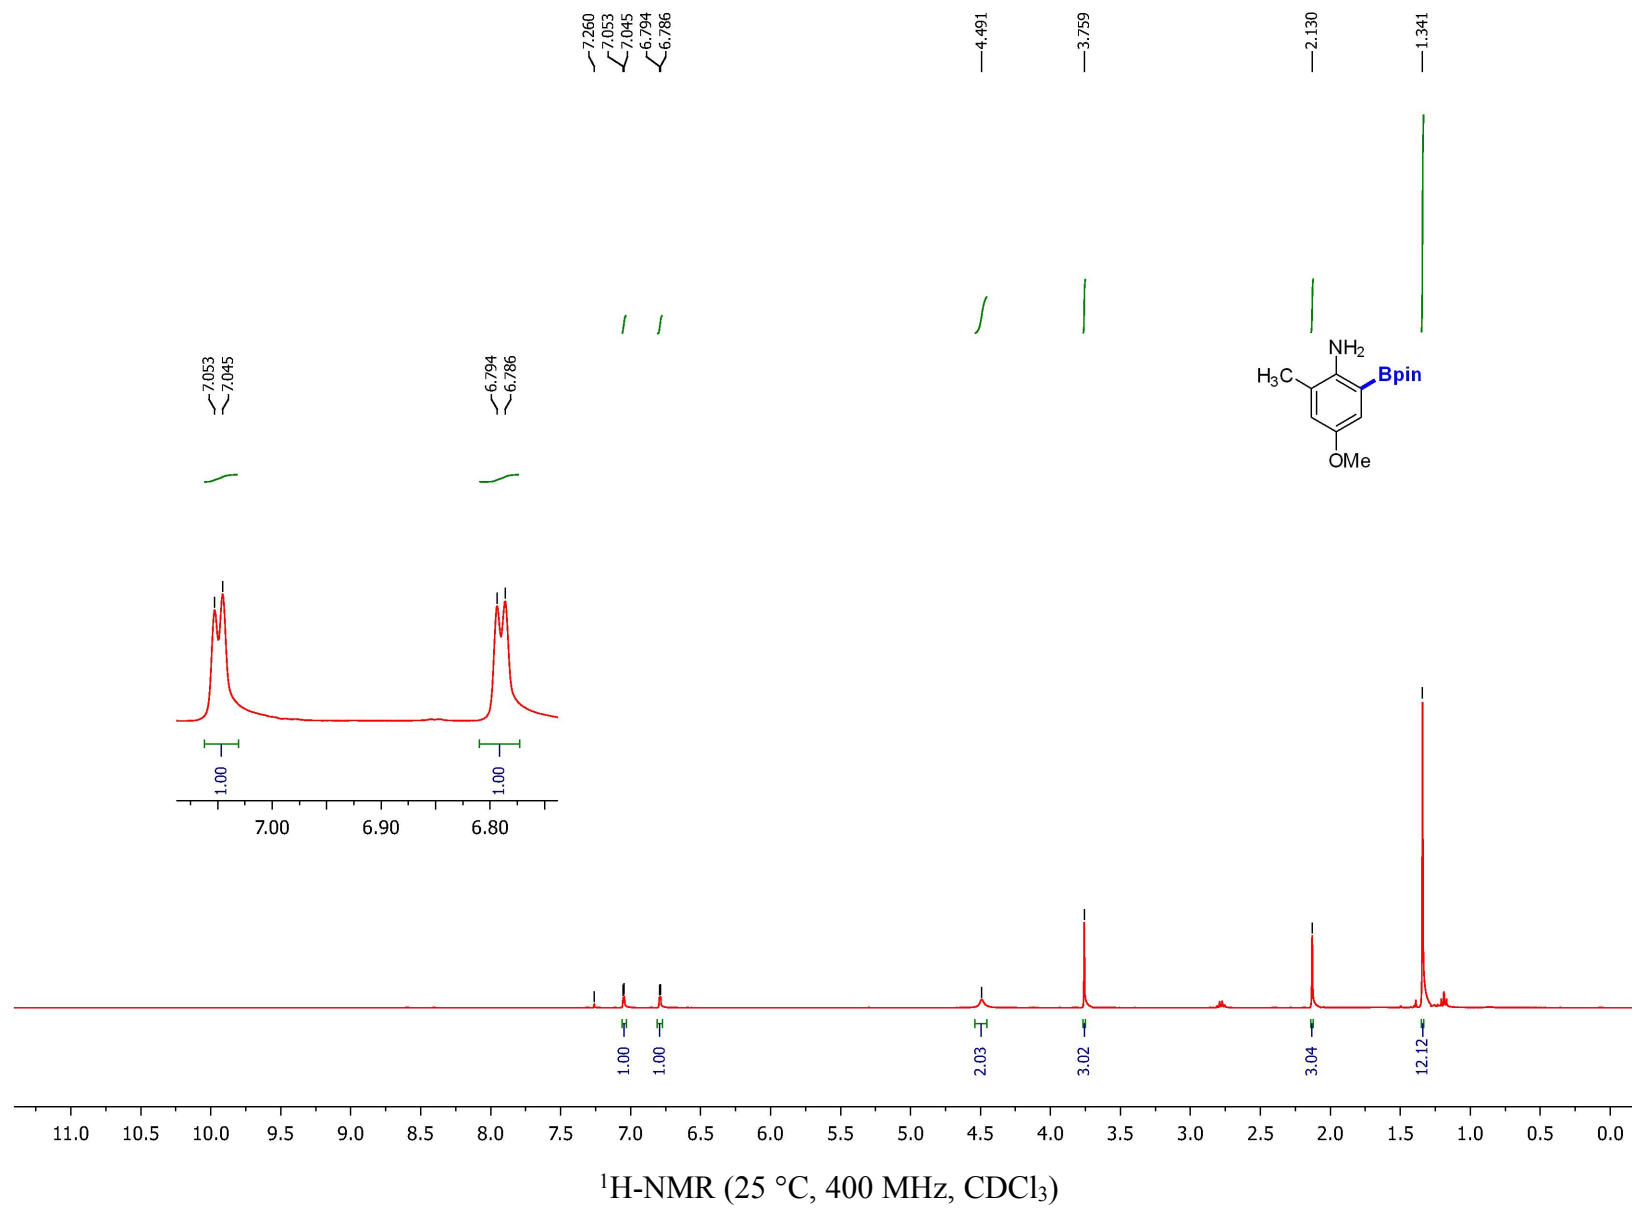

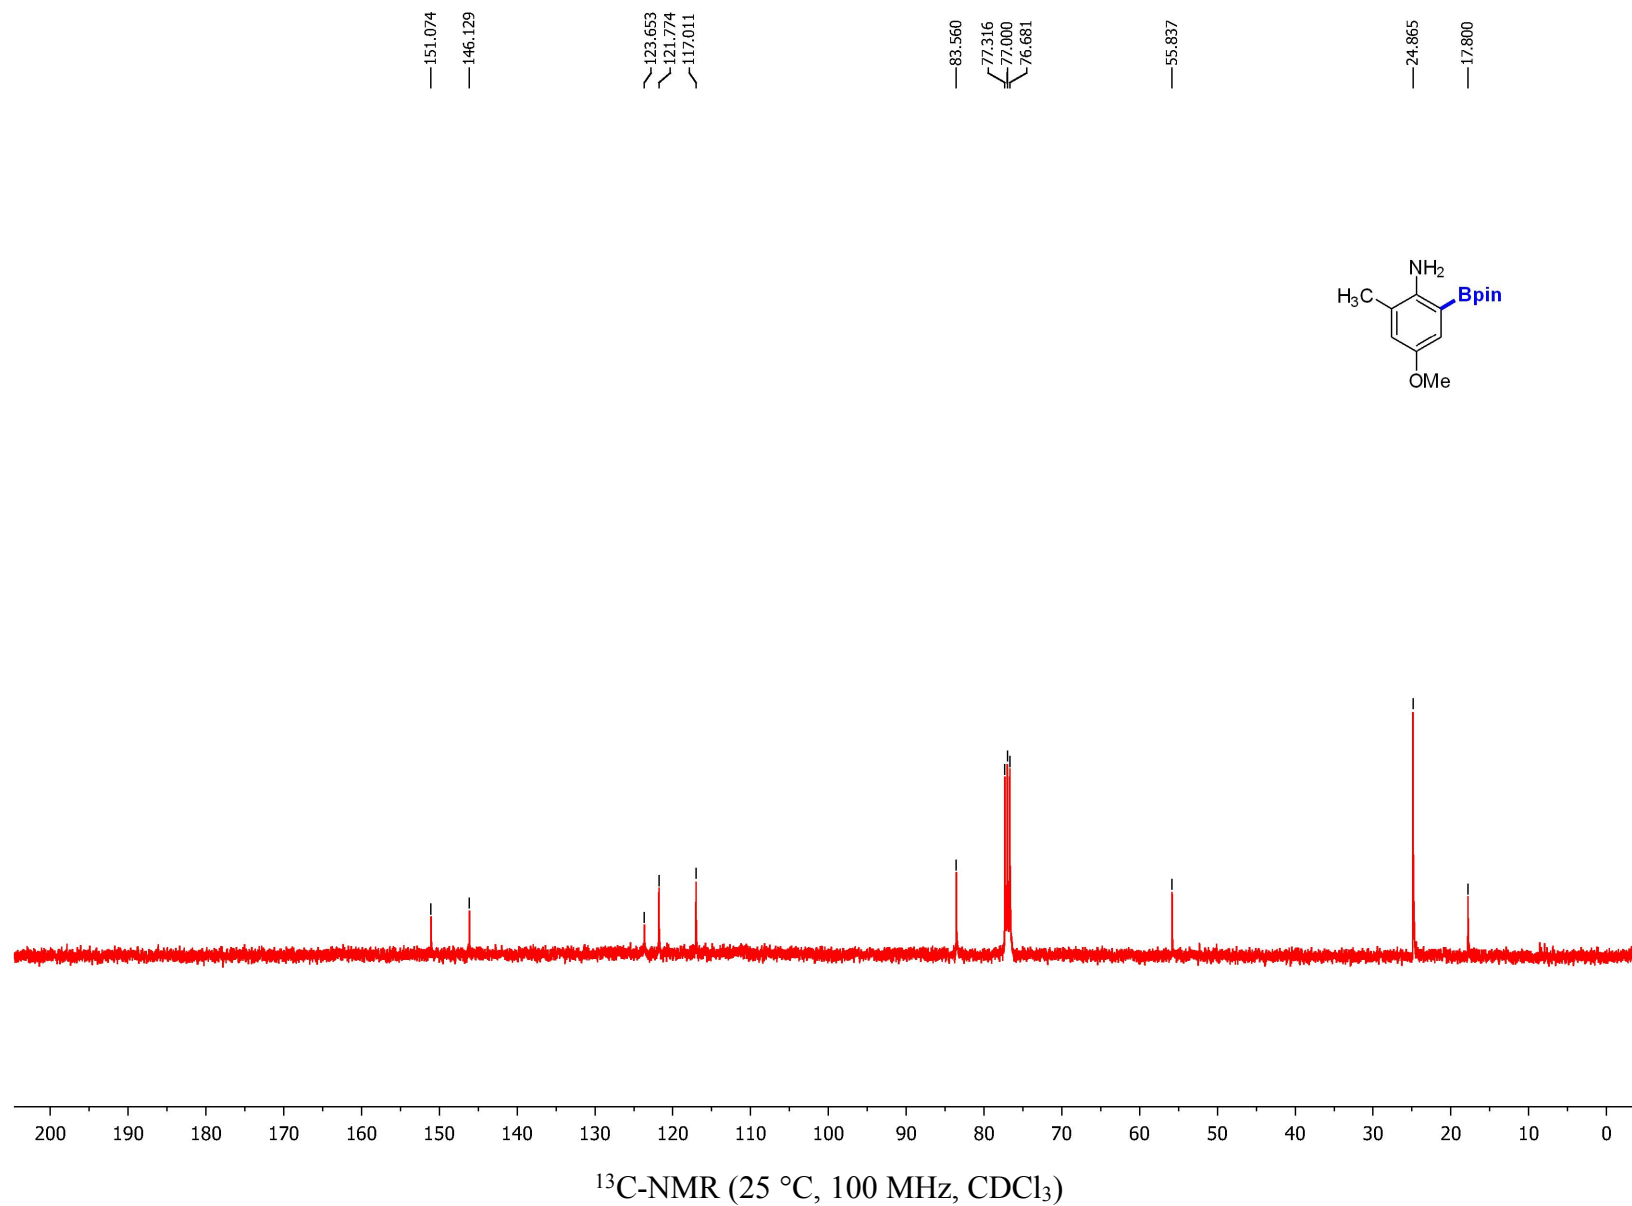

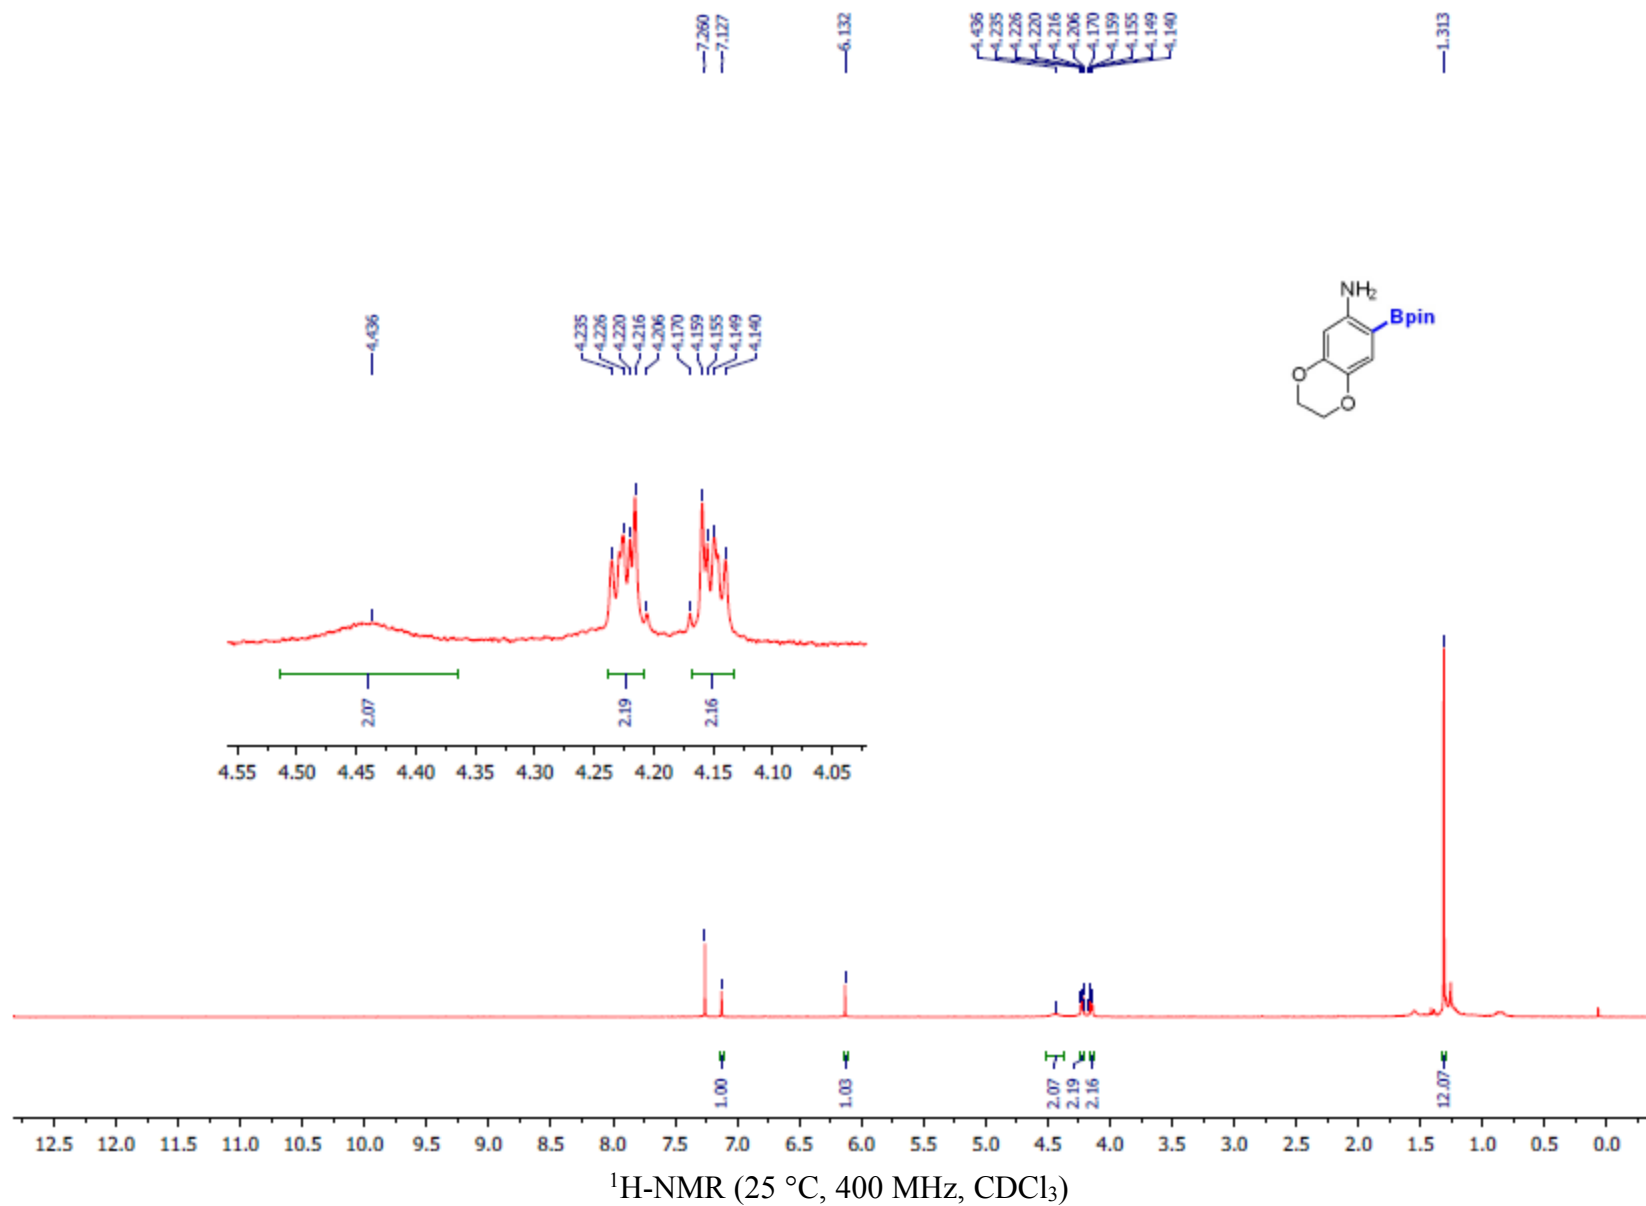

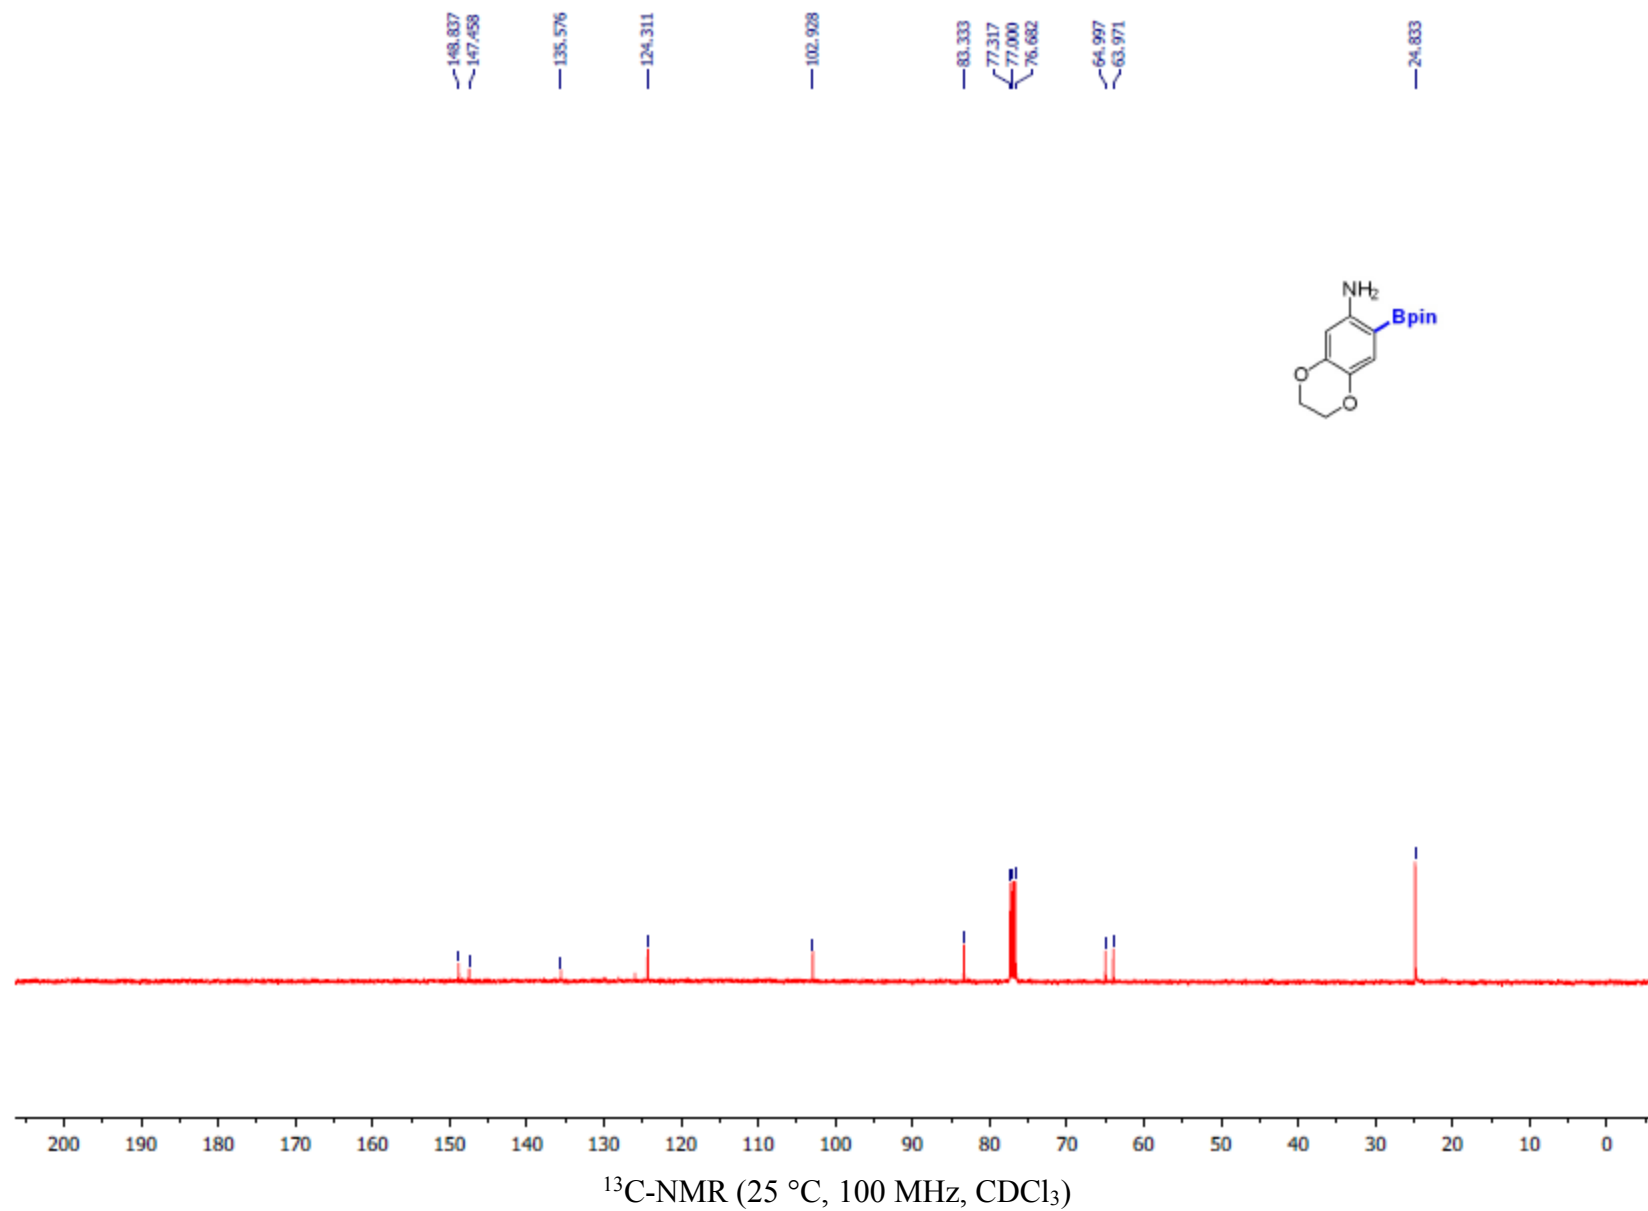

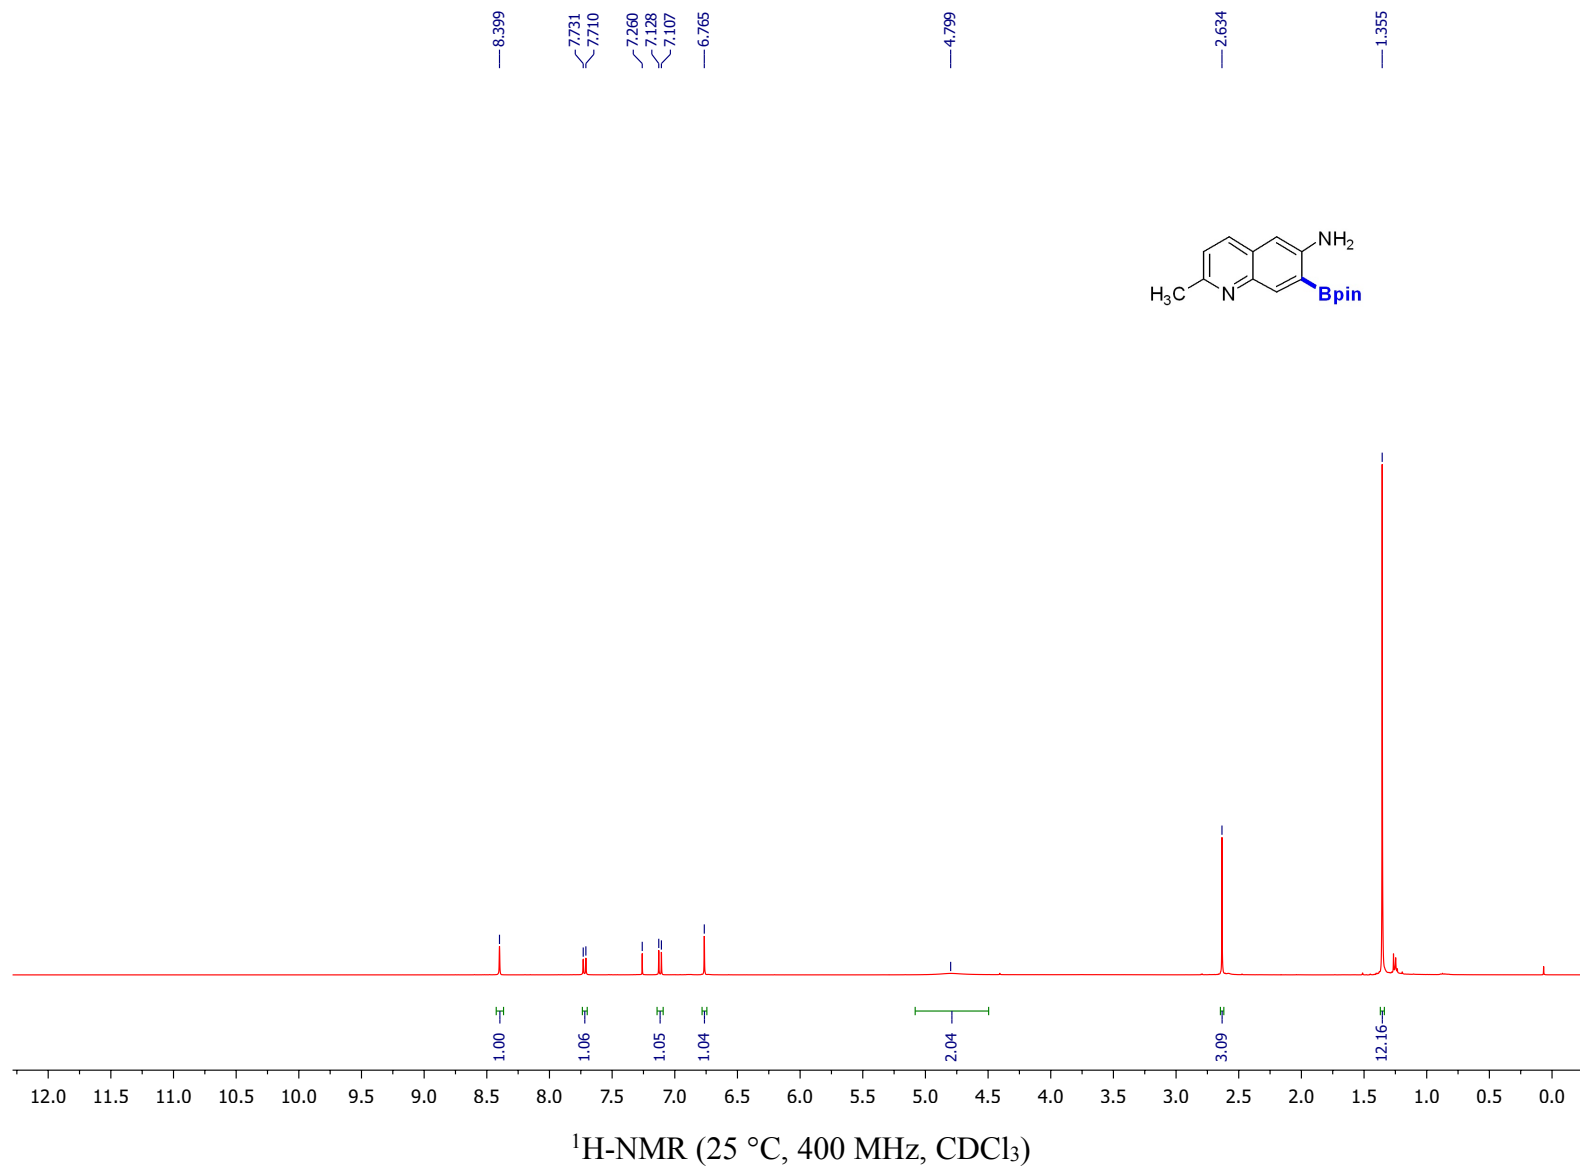

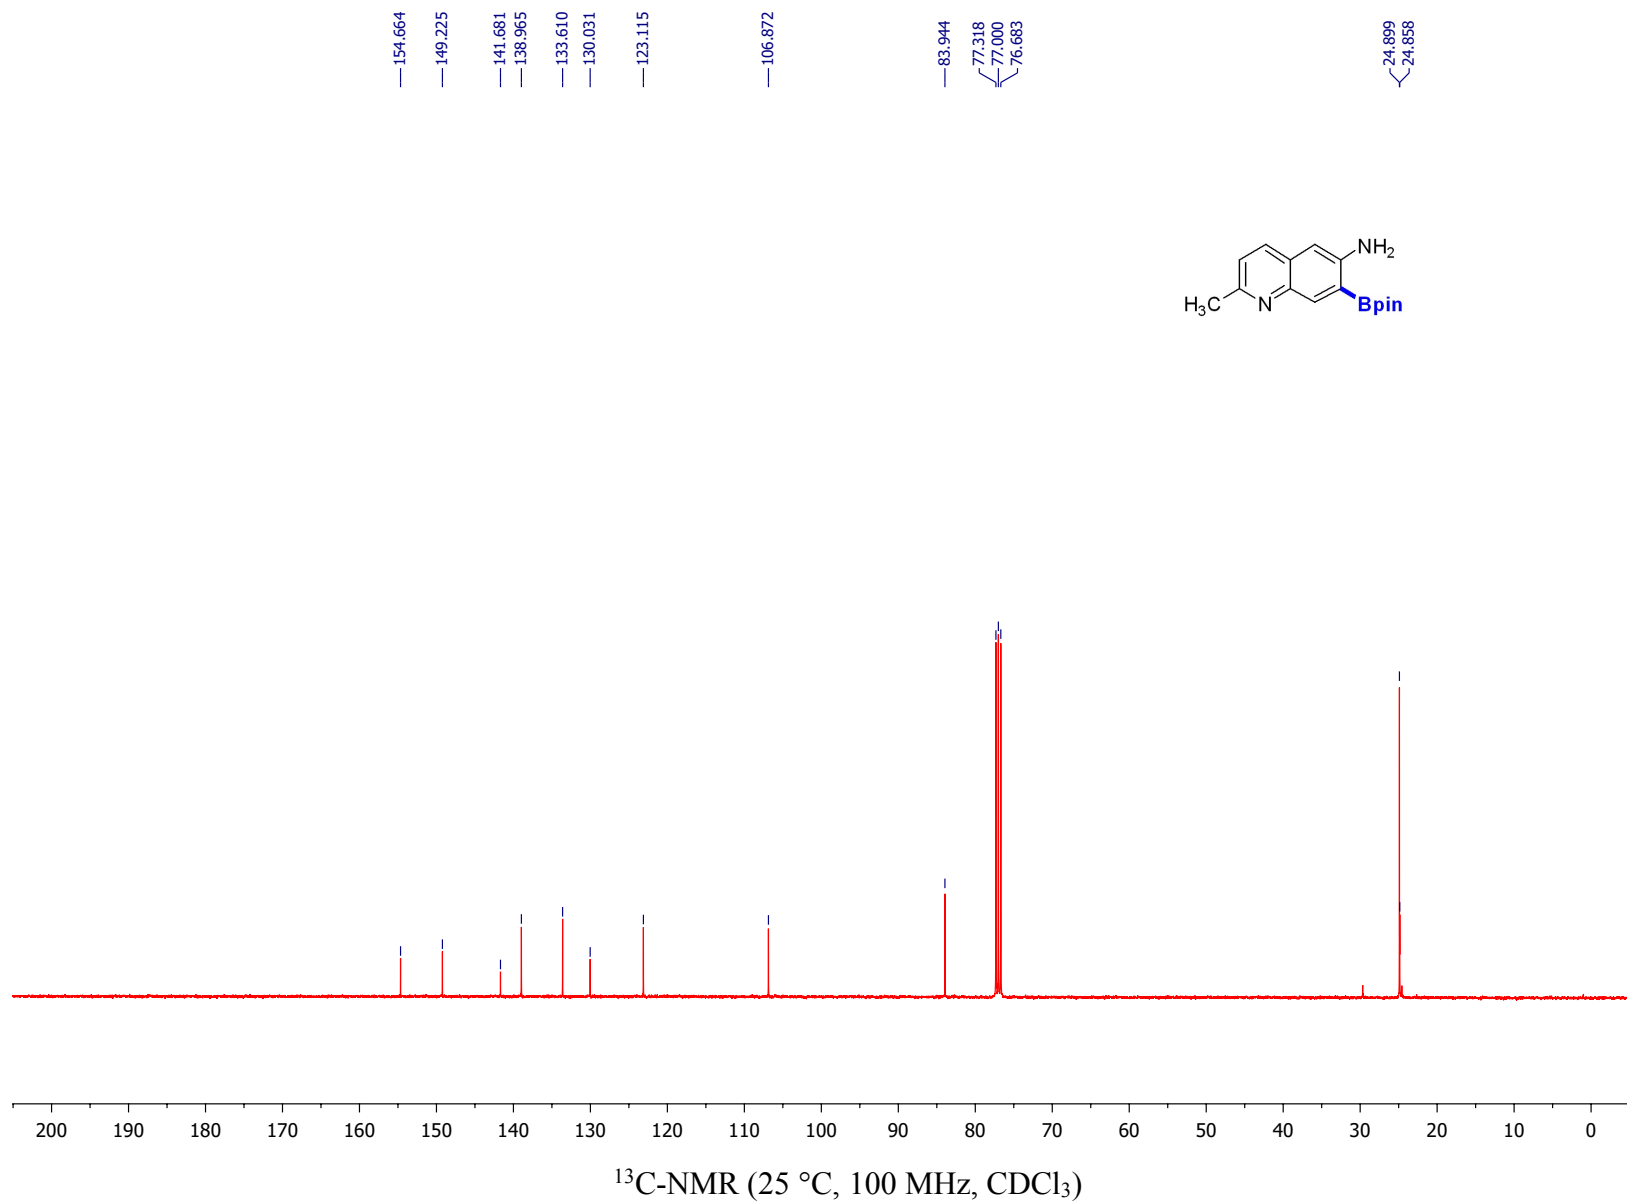

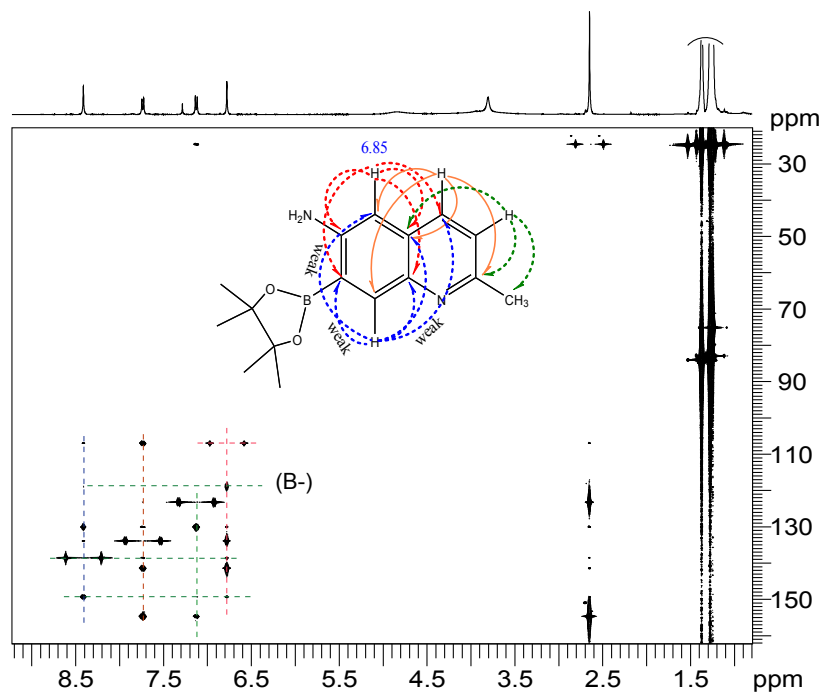

2-D NMR HMBC (25° C, 400 MHz,  $\text{CDCl}_3$ )

## References

- 1) Chattopadhyay, B.; Dannatt, J. E.; Andujar-De Sanctis, I. L.; Gore, K. A.; Maleczka, R. E., Jr.; Singleton, D. A.; Smith, M. R., III *J. Am. Chem. Soc.* **2017**, *139*, 7864.
- 2) Kong, C.; Jana, N.; Jones, C.; Driver, T. G. *J. Am. Chem. Soc.* **2016**, *138*, 13271.
- 3) Preshlock, S. M.; Plattner, D. L.; Maligres, P. E.; Krska, S. W.; Maleczka, R. E.; Smith, M. R. *Angew. Chem. Int. Ed.* **2013**, *52*, 12915.
- 4) Manna, K.; Zhang, T.; Greene, F. X.; Lin, W. *J. Am. Chem. Soc.* **2015**, *137*, 2665.
- 5) Kong, C.; Jana, N.; Jones, C.; Driver, T. G. *J. Am. Chem. Soc.* **2016**, *138*, 13271.
- 6) Lam, H.; Tsoung, J.; Lautens, M. *J. Org. Chem.*, **2017**, *82*, 6089.
- 7) Romero, E. A.; Peltier, J. L.; Jazzar, R.; Bertrand, G. *Chem. Commun.* **2016**, *52*, 10563.
- 8) Gaussian 09, Revision A.02, Frisch, M. J.; Trucks, G. W.; Schlegel, H. B.; Scuseria, G. E.; Robb, M. A.; Cheeseman, J. R.; Scalmani, G.; Barone, V.; Mennucci, B.; Petersson, G. A.; Nakatsuji, H.; Caricato, M.; Li, X.; Hratchian, H. P.; Izmaylov, A. F.; Bloino, J.; Zheng, G.; Sonnenberg, J. L.; Hada, M.; Ehara, M.; Toyota, K.; Fukuda, R.; Hasegawa, J.; Ishida, M.; Nakajima, T.; Honda, Y.; Kitao, O.; Nakai, H.; Vreven, T.; Montgomery, Jr., J. A.; Peralta, J. E.; Ogliaro, F.; Bearpark, M.; Heyd, J. J.; Brothers, E.; Kudin, K. N.; Staroverov, V. N.; Kobayashi, R.; Normand, J.; Raghavachari, K.; Rendell, A.; Burant, J. C.; Iyengar, S. S.; Tomasi, J.; Cossi, M.; Rega, N.; Millam, N. J.; Klene, M.; Knox, J. E.; Cross, J. B.; Bakken, V.; Adamo, C.; Jaramillo, J.; Gomperts, R.; Stratmann, R. E.; Yazyev, O.; Austin, A. J.; Cammi, R.; Pomelli, C.; Ochterski, J. W.; Martin, R. L.; Morokuma, K.; Zakrzewski, V. G.; Voth, G. A.; Salvador, P.; Dannenberg, J. J.; Dapprich, S.; Daniels, A. D.; Farkas, Ö.; Foresman, J. B.; Ortiz, J. V.; Cioslowski, J.; Fox, D. J. Gaussian, Inc., Wallingford CT, 2009.
- 9) Gaussian 09, Revision B.01, Frisch, M. J.; Trucks, G. W.; Schlegel, H. B.; Scuseria, G. E.; Robb, M. A.; Cheeseman, J. R.; Scalmani, G.; Barone, V.; Mennucci, B.; Petersson, G. A.; Nakatsuji, H.; Caricato, M.; Li, X.; Hratchian, H. P.; Izmaylov, A. F.; Bloino, J.; Zheng, G.; Sonnenberg, J. L.; Hada, M.; Ehara, M.; Toyota, K.; Fukuda, R.; Hasegawa, J.; Ishida, M.; Nakajima, T.; Honda, Y.; Kitao, O.; Nakai, H.; Vreven, T.; Montgomery, Jr., J. A.; Peralta, J. E.; Ogliaro, F.; Bearpark, M.; Heyd, J. J.; Brothers, E.; Kudin, K. N.; Staroverov, V. N.; Kobayashi, R.; Normand, J.; Raghavachari, K.; Rendell, A.; Burant, J. C.; Iyengar, S. S.; Tomasi, J.; Cossi, M.; Rega, N.; Millam, N. J.; Klene, M.; Knox, J. E.; Cross, J. B.; Bakken, V.; Adamo, C.; Jaramillo, J.; Gomperts, R.; Stratmann, R. E.; Yazyev, O.; Austin, A. J.; Cammi, R.; Pomelli, C.; Ochterski, J. W.; Martin, R. L.; Morokuma, K.; Zakrzewski, V. G.; Voth, G. A.; Salvador, P.; Dannenberg, J. J.; Dapprich, S.; Daniels, A. D.; Farkas, Ö.; Foresman, J. B.; Ortiz, J. V.; Cioslowski, J.; Fox, D. J. Gaussian, Inc., Wallingford CT, 2009.
- 10) Gaussian 09, Revision D.01, Frisch, M. J.; Trucks, G. W.; Schlegel, H. B.; Scuseria, G. E.; Robb, M. A.; Cheeseman, J. R.; Scalmani, G.; Barone, V.; Mennucci, B.; Petersson, G. A.; Nakatsuji, H.; Caricato, M.; Li, X.; Hratchian, H. P.; Izmaylov, A. F.; Bloino, J.; Zheng, G.; Sonnenberg, J. L.; Hada, M.; Ehara, M.; Toyota, K.; Fukuda, R.; Hasegawa, J.; Ishida, M.; Nakajima, T.; Honda, Y.; Kitao, O.; Nakai, H.; Vreven, T.; Montgomery, Jr., J. A.; Peralta, J. E.; Ogliaro, F.; Bearpark, M.; Heyd, J. J.; Brothers, E.; Kudin, K. N.; Staroverov, V. N.; Kobayashi, R.; Normand, J.; Raghavachari, K.; Rendell, A.; Burant, J. C.; Iyengar, S. S.; Tomasi, J.; Cossi, M.; Rega, N.; Millam, N. J.; Klene, M.; Knox, J. E.; Cross, J. B.; Bakken, V.; Adamo, C.; Jaramillo, J.; Gomperts, R.; Stratmann, R. E.; Yazyev, O.; Austin, A. J.; Cammi, R.; Pomelli, C.; Ochterski, J. W.; Martin, R. L.; Morokuma, K.; Zakrzewski, V. G.;

---

Voth, G. A.; Salvador, P.; Dannenberg, J. J.; Dapprich, S.; Daniels, A. D.; Farkas, Ö.;  
Foresman, J. B.; Ortiz, J. V.; Cioslowski, J.; Fox, D. J. Gaussian, Inc., Wallingford CT, 2009.
